# Supplementary material for: Palladium catalyzed decarboxylative β-C-glycosylation of glycals with oxazol-5-(4H)-ones as acceptors
Source: Royal Society of Chemistry journal article supplement (doi:10.1039/d2qo01308h), 2022-01-01
Supplement: d2qo01308h1.pdf [file d2qo01308h1.pdf]

## Supporting Information

### Palladium catalyzed decarboxylative $\beta$ -C-glycosylation of glycals with oxazol-5-(4*H*)-ones as acceptors

Wei-Yi Ding,<sup>‡a</sup> Huan-Huan Liu,<sup>‡a</sup> Jun Kee Cheng,<sup>a</sup> Hui Yao,<sup>\*b</sup> Shao-Hua Xiang<sup>\*a</sup> and Bin Tan<sup>a</sup>

<sup>a</sup> Key Laboratory of Catalysis, Southern University of Science and Technology, Shenzhen, 518055, China. Email: xiangsh@sustech.edu.cn

<sup>b</sup> Hubei Key Laboratory of Natural Products Research and Development, College of Biological and Pharmaceutical Sciences, China Three Gorges University, Yichang, 443002, China. Email: yaohui@ctgu.edu.cn

<sup>‡</sup> These authors contributed equally

#### Table of Contents

|                                                                              |      |
|------------------------------------------------------------------------------|------|
| 1. General information.....                                                  | S2   |
| 2. Substrates involved in the manuscript.....                                | S3   |
| 3. Procedures for the preparation of substrates.....                         | S4   |
| 4. $\beta$ -C-glycosylation of glycals with oxazol-5-(4 <i>H</i> )-ones..... | S7   |
| 5. Synthetic transformations of $\beta$ -C-glycoside 3a.....                 | S30  |
| 6. Crystal data and structure refinement for $\beta$ -( <i>S</i> )-9a.....   | S34  |
| 7. Copies of NMR spectra.....                                                | S51  |
| 8. $\beta$ -selectivity at anomeric center determined by 2D-NMR.....         | S100 |
| 9. Supplementary references.....                                             | S108 |



## 1. General information

Chemicals were purchased from commercial suppliers and used without further purification unless otherwise stated. Analytical thin layer chromatography (TLC) was performed on precoated silica gel 60 GF254 plates. Flash column chromatography was performed using Tsingdao silica gel (60, particle size 0.040-0.063 mm). Visualization on TLC was achieved by use of UV light (254 nm).  $^1\text{H}$  and  $^{13}\text{C}$  NMR spectra were recorded on Bruker 400 MHz or 500 MHz spectrometer in  $\text{CDCl}_3$ , acetone- $d_6$  or DMSO- $d_6$  with tetramethylsilane (TMS) as internal standard. The chemical shifts are expressed in ppm and coupling constants are given in Hz. Data for  $^1\text{H}$  NMR are recorded as follows: chemical shift ( $\delta$ , ppm), multiplicity (s = singlet; d = doublet; t = triplet; q = quartet; p = pentet; m = multiplet; brs = broad singlet), coupling constant (Hz), integration. Data for  $^{13}\text{C}$  NMR are reported in terms of chemical shift ( $\delta$ , ppm). The enantiomeric excess values were determined by chiral HPLC with an Agilent instrument and a Daicel CHIRALCEL and CHIRALPAK column. High resolution mass spectroscopy (HRMS) analyses were performed at a Q-Exactive (Thermo Scientific) Inc mass instrument.

## 2. Substrates involved in the manuscript

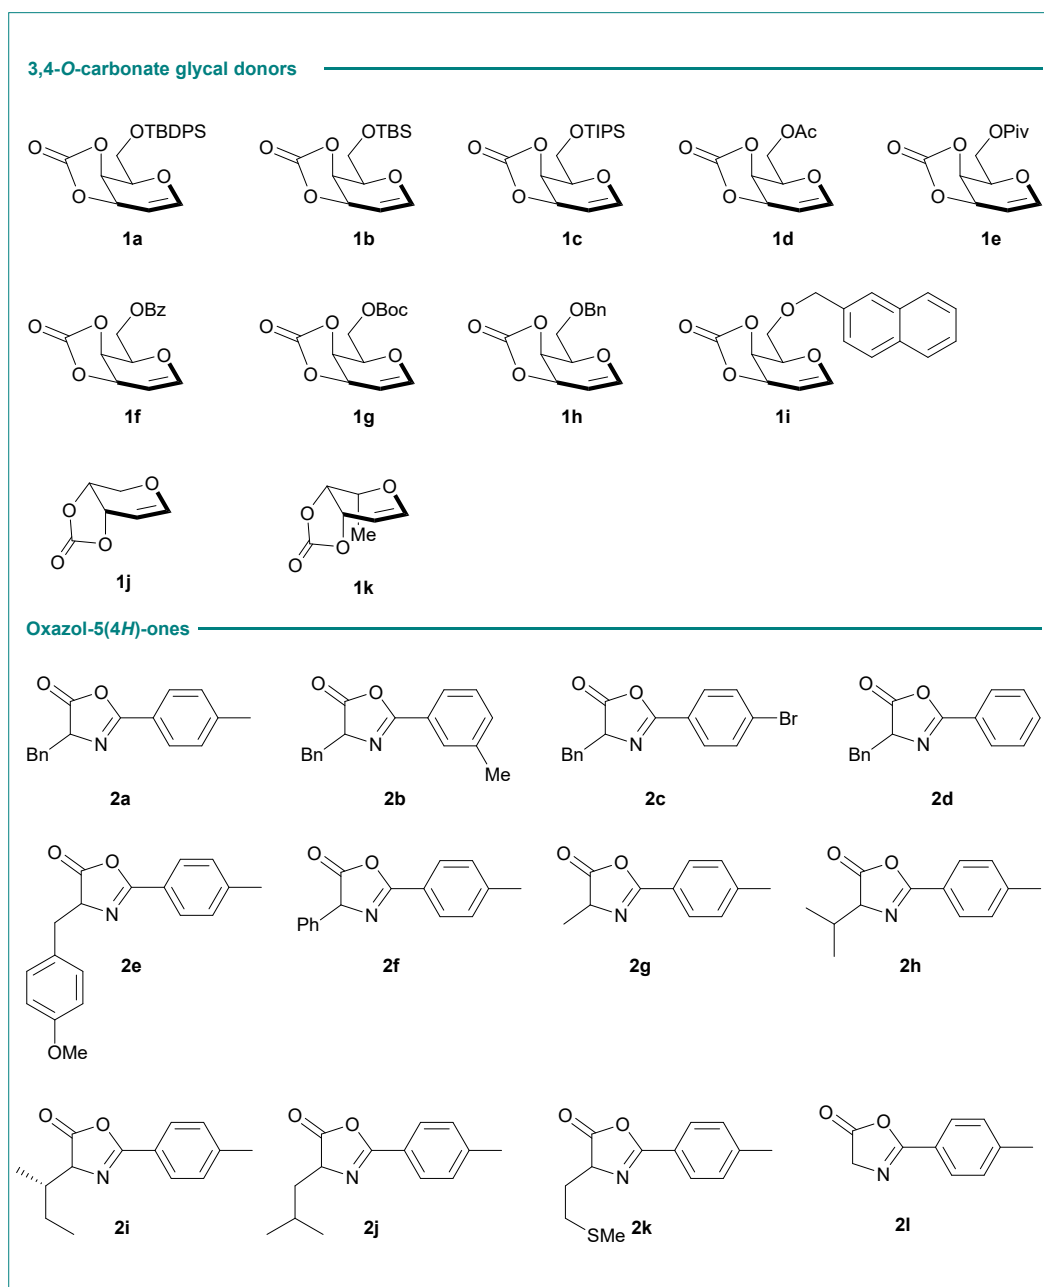

**Figure S1.** Substrates were investigated in the manuscript

### 3. Procedures for the preparation of substrates 1 and 2

#### 3.1 Procedures for the preparation of 3,4-*O*-carbonate glycal donor 1

Galactal donors **1a-1h** were prepared according to the corresponding literatures<sup>1</sup> and **1i** was obtained as the following procedure.

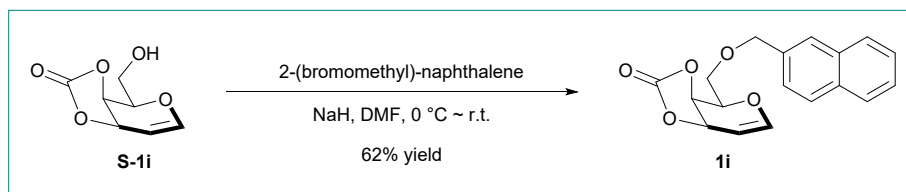

A solution of carbonate derivative **S-1i**<sup>1b</sup> (226 mg, 1.3 mmol) in anhydrous DMF (2 mL) was slowly treated with sodium hydride (78 mg, 1.95 mmol) at 0 °C (ice bath). Ten minutes later, 2-(Bromomethyl)-naphthalene (431 mg, 1.95 mmol) was added, and the resulting mixture was stirred at room temperature overnight. The starting material was consumed completely indicated by TLC chromatography. The reaction mixture was cooled to 0 °C and quenched by NH<sub>4</sub>Cl aqueous, then extracted by EtOAc (10 mL × 2), the combined organic phases were washed with water (15 mL) and brine (15 mL). The separated organic phase was dried over Na<sub>2</sub>SO<sub>4</sub> and concentrated to provide the crude product which was purified by silica column chromatography (EtOAc/petroleum ether = 1/3). Galactal donor **1i** could be afforded as a white powder (62% yield), m.p. 69-71 °C.

<sup>1</sup>H NMR (400 MHz, CDCl<sub>3</sub>) δ 7.86 – 7.83 (m, 3H), 7.78 (s, 1H), 7.51 – 7.44 (m, 3H), 6.68 (d, *J* = 6.3 Hz, 1H), 5.15 (ddd, *J* = 7.7, 3.1, 1.1 Hz, 1H), 4.96 – 4.91 (m, 2H), 4.75 (t, *J* = 12.4 Hz, 2H), 4.10 (td, *J* = 6.7, 1.6 Hz, 1H), 3.88 – 3.78 (m, 2H);

<sup>13</sup>C NMR (100 MHz, CDCl<sub>3</sub>) δ 154.0, 149.2, 134.6, 133.2, 133.1, 128.4, 127.9, 127.7, 126.8, 126.3, 126.1, 125.6, 98.0, 73.9, 73.2, 72.5, 68.8, 68.0;

HRMS (ESI) *m/z*: [M+Na] calcd. for C<sub>18</sub>H<sub>16</sub>O<sub>5</sub>Na, 335.0895; found, 335.0891.

#### 3.2 Procedures for the preparation of oxazol-5(4*H*)-ones 2

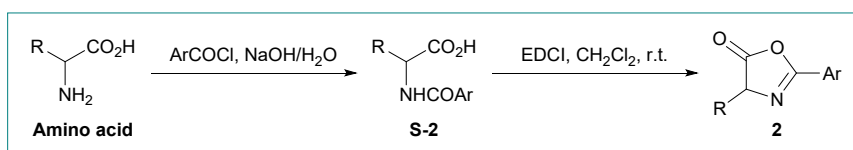

Oxazol-5(4*H*)-ones **2** were prepared according to the literature method.

**Step 1, synthesis of *N*-benzoyl amino acid.**<sup>2</sup> The corresponding commercially available amino acid (40 mmol, 1 equiv) was slowly dissolved in 2 N NaOH (50 mL, 100 mmol, 2.5 equiv) under 0 °C, benzoyl chloride (1.05 equiv) was added dropwise at this temperature. After the addition was complete, the mixture was stirred for additional 30 min at 0 °C. Subsequently, the mixture was allowed to warm to room temperature or 75 °C (for Val, Leu, Ile, Met) and was stirred for two additional hours. After cooling to 0 °C with ice bath, the reaction mixture was acidified with 6 N HCl to give a white precipitation. The total mixture was kept at 0 °C for an hour, after which a solid was collected, washed with cold water, and air-dried. Without further purification, the crude product was used for next step.

**Step 2, synthesis of oxazol-5(4*H*)-ones **2**.**<sup>3</sup> To a suspension of *N*-benzoyl amino acid (10 mmol) in anhydrous CH<sub>2</sub>Cl<sub>2</sub> (30 mL) was added EDCI•HCl (2.5 g, 13 mmol, 1.3 equiv) at room temperature. The reaction mixture was washed with water (20 mL) and brine (20 mL), then dried with Na<sub>2</sub>SO<sub>4</sub>. Removal of the solvent under reduced pressure to give crude product which was purified by silica column chromatography to provide desire oxazolone derivatives **2**. The NMR spectroscopic data of oxazol-5(4*H*)-ones **2a-2g** were identical to those in the previous report.

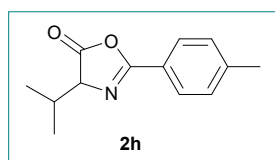

White powder, 79% yield, m.p. 47-49 °C.

<sup>1</sup>H NMR (400 MHz, CDCl<sub>3</sub>) δ 7.92 (d, *J* = 7.9 Hz, 2H), 7.31 (d, *J* = 8.0 Hz, 2H), 4.30 (d, *J* = 4.4 Hz, 1H), 2.45 (s, 3H), 2.45 – 2.36 (m, 1H), 1.16 (d, *J* = 6.9 Hz, 3H), 1.04 (d, *J* = 6.9 Hz, 3H);

<sup>13</sup>C NMR (100 MHz, CDCl<sub>3</sub>) δ 178.0, 161.7, 143.4, 129.5, 127.8, 123.1, 70.6, 31.2, 21.7, 18.7, 17.5;

HRMS (ESI) *m/z*: [M+H] calcd. for C<sub>13</sub>H<sub>16</sub>NO<sub>2</sub>, 218.1181; found, 218.1177.

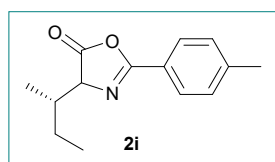

Colorless oil, 95% yield.

<sup>1</sup>H NMR (400 MHz, CDCl<sub>3</sub>) δ 7.91 – 7.88 (m, 2H), 7.29 (d, *J* = 8.4 Hz, 2H), 4.40 (dz, *J* = 3.9 Hz, 0.54 H), 4.35 (d, *J* = 4.3 Hz, 0.46 H),

2.43 (s, 3H), 2.18 – 2.08 (m, 1H), 1.74 – 1.33 (m, 2H), 1.17 – 0.90 (m, 6H);

<sup>13</sup>C NMR (100 MHz, CDCl<sub>3</sub>) δ 178.7, 177.9, 161.7, 161.6, 143.3, 129.5, 129.5, 127.8, 127.8,

123.1, 69.7, 69.1, 37.7, 26.2, 25.0, 21.7, 15.4, 14.4, 11.8, 11.7;

**HRMS (ESI)  $m/z$ :**  $[M+H]$  calcd. for  $C_{14}H_{18}NO_2$ , 232.1338; found, 232.1332.

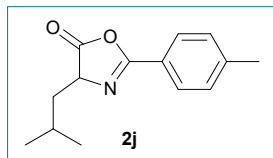

White powder, 87% yield, m.p. 58-60 °C.

**$^1H$  NMR (400 MHz,  $CDCl_3$ )**  $\delta$  7.88 (d,  $J = 8.3$  Hz, 2H), 7.28 (d,  $J = 8.0$  Hz, 2H), 4.40 (dd,  $J = 8.9, 5.7$  Hz, 1H), 2.43 (s, 3H), 2.11 – 2.01 (m, 1H), 1.83 (ddd,  $J = 13.6, 7.8, 5.7$  Hz, 1H), 1.71 – 1.64 (m, 1H), 1.03 (d,  $J = 6.7$  Hz, 3H), 1.01 (d,  $J = 6.7$  Hz, 3H);

**$^{13}C$  NMR (100 MHz,  $CDCl_3$ )**  $\delta$  179.2, 161.4, 143.3, 129.5, 127.8, 123.2, 63.9, 40.8, 25.2, 22.7, 22.0, 21.7;

**HRMS (ESI)  $m/z$ :**  $[M+H]$  calcd. for  $C_{14}H_{18}NO_2$ , 232.1338; found, 232.1333.

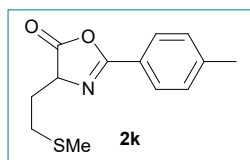

White powder, 79% yield, m.p. 139-141 °C.

**$^1H$  NMR (400 MHz,  $CDCl_3$ )**  $\delta$  7.88 (d,  $J = 8.0$  Hz, 2H), 7.29 (d,  $J = 8.0$  Hz, 2H), 4.58 (dd,  $J = 7.2, 5.8$  Hz, 1H), 2.73 (t,  $J = 7.1$  Hz, 2H), 2.43 (s, 3H), 2.30 (dtd,  $J = 14.1, 7.0, 5.8$  Hz, 1H), 2.18 – 2.09 (m, 4H);

**$^{13}C$  NMR (100 MHz,  $CDCl_3$ )**  $\delta$  178.6, 162.1, 143.5, 129.5, 127.9, 123.0, 63.6, 30.5, 30.0, 21.7, 15.1;

**HRMS (ESI)  $m/z$ :**  $[M+H]$  calcd. for  $C_{13}H_{16}NO_2S$ , 250.0902; found, 250.0897.

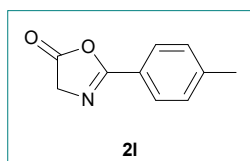

White powder, 75% yield, m.p. 92-94 °C.

**$^1H$  NMR (400 MHz,  $CDCl_3$ )**  $\delta$  7.88 (d,  $J = 8.3$  Hz, 2H), 7.29 (d,  $J = 8.0$  Hz, 2H), 4.41 (s, 2H), 2.43 (s, 3H);

**$^{13}C$  NMR (100 MHz,  $CDCl_3$ )**  $\delta$  176.1, 163.5, 143.6, 129.5, 127.8, 123.0, 55.0, 21.7;

**HRMS (ESI)  $m/z$ :**  $[M+H]$  calcd. for  $C_{10}H_{10}NO_2$ , 176.0712; found, 176.0707.

#### 4. $\beta$ -C-glycosylation of glycols with oxazol-5-(4H)-ones

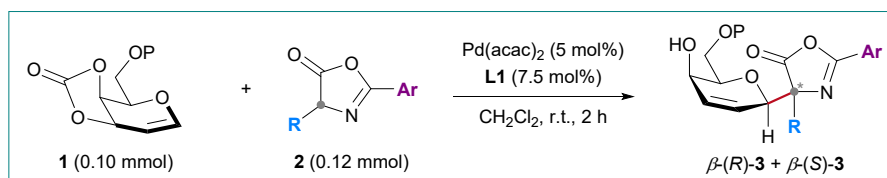

Under argon atmosphere, a resealable Schlenk tube equipped with a magnetic stir bar was charged with Pd(acac)<sub>2</sub> (1.5 mg, 5 mol%), ligand **L1** (4.1 mg, 7.5 mol%) and 3,4-*O*-carbonate glycol donor **1** (0.1 mmol) and oxazol-5(4*H*)-ones **2** (0.12 mmol). Then anhydrous CH<sub>2</sub>Cl<sub>2</sub> (2 mL) was added and the resulting mixture was degassed and refilled in three cycles. The reaction mixture was stirred at room temperature and monitored by TLC until the glycol donor was consumed completely in two hours. The solvent was removed under reduced pressure to afford a crude product which was purified by preparative TLC (EtOAc/petroleum ether or CH<sub>2</sub>Cl<sub>2</sub>/MeOH) to yield 4-hydroxyl 2,3-unsaturated C-glycoside  $\beta$ -(*R*)-**3** and  $\beta$ -(*S*)-**3**. (*Note*: DABCO (1.2 equiv) was needed for substrates **2g-2i**).



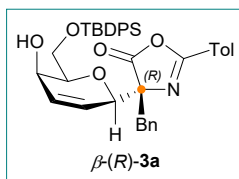

Compound  $\beta$ -(*R*)-**3a** was obtained as colorless syrup in 29% yield.

**$^1\text{H}$  NMR (400 MHz, acetone- $d_6$ )**  $\delta$  7.76 – 7.70 (m, 6H), 7.45 – 7.37 (m, 6H), 7.27 (d,  $J$  = 7.9 Hz, 2H), 7.20 – 7.12 (m, 5H), 6.26 (ddd,  $J$  = 10.4, 5.7, 2.0 Hz, 1H), 6.08 (dd,  $J$  = 10.3, 1.5 Hz, 1H), 4.60 (d,  $J$  = 2.0 Hz, 1H), 4.00 – 3.93 (m, 2H), 3.87 – 3.79 (m, 2H), 3.42 (d,  $J$  = 13.5 Hz, 1H), 3.31 (d,  $J$  = 13.5 Hz, 1H), 3.22 (d,  $J$  = 9.5 Hz, 1H), 2.36 (s, 3H), 0.99 (s, 9H);

**$^{13}\text{C}$  NMR (100 MHz, acetone- $d_6$ )**  $\delta$  177.5, 161.4, 144.3, 136.3, 136.3, 135.4, 134.4, 134.2, 131.9, 131.2, 130.5, 130.2, 128.8, 128.6, 128.5, 127.8, 123.7, 79.6, 78.0, 77.6, 64.5, 62.4, 39.5, 27.1, 21.5, 19.7;

**HRMS (ESI)  $m/z$ :** [M+Na] calcd. for  $\text{C}_{39}\text{H}_{41}\text{NO}_5\text{SiNa}$ , 654.2652; found, 654.2662.

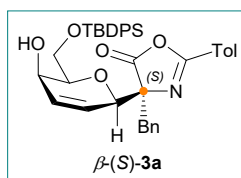

Compound  $\beta$ -(*S*)-**3a** was obtained as colorless syrup in 63% yield.

**$^1\text{H}$  NMR (400 MHz, acetone- $d_6$ )**  $\delta$  7.76 – 7.71 (m, 6H), 7.46 – 7.38 (m, 6H), 7.30 – 7.27 (m, 2H), 7.21 – 7.11 (m, 5H), 6.30 (ddd,  $J$  = 10.2, 5.8, 2.0 Hz, 1H), 6.14 (dd,  $J$  = 10.3, 1.8 Hz, 1H), 4.70 (d,  $J$  = 1.9 Hz, 1H), 3.96 (ddt,  $J$  = 7.5, 5.7, 1.7 Hz, 1H), 3.90 – 3.79 (m, 3H), 3.40 (d,  $J$  = 13.3 Hz, 1H), 3.31 (d,  $J$  = 13.3 Hz, 1H), 2.84 (d,  $J$  = 9.9 Hz, 1H), 2.37 (s, 3H), 1.04 (s, 9H);

**$^{13}\text{C}$  NMR (100 MHz, acetone- $d_6$ )**  $\delta$  177.9, 162.0, 144.4, 136.3, 136.2, 135.1, 134.3, 134.1, 131.8, 131.8, 131.2, 130.5, 130.3, 128.8, 128.6, 128.5, 128.5, 127.9, 127.8, 123.7, 79.3, 78.0, 77.8, 64.5, 62.4, 39.5, 27.1, 21.5, 19.7.;

**HRMS (ESI)  $m/z$ :** [M+Na] calcd. for  $\text{C}_{39}\text{H}_{41}\text{NO}_5\text{SiNa}$ , 654.2652; found, 654.2660.

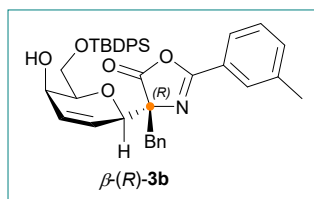

Compound  $\beta$ -(R)-**3b** was obtained as colorless syrup in 30% yield.

**$^1\text{H}$  NMR (400 MHz, acetone- $d_6$ )**  $\delta$  7.75 (dd,  $J = 7.4, 1.8$  Hz, 2H), 7.71 – 7.69 (m, 2H), 7.65 – 7.62 (m, 2H), 7.45 – 7.31 (m, 8H), 7.22 – 7.11 (m, 5H), 6.28 (ddd,  $J = 10.3, 5.7, 2.0$  Hz, 1H), 6.14 (dd,  $J = 10.3, 1.6$  Hz, 1H), 4.61 (d,  $J = 2.2$  Hz, 1H), 4.00 – 3.92 (m, 2H), 3.87 – 3.78 (m, 2H), 3.41 (d,  $J = 13.5$  Hz, 1H), 3.34 (d,  $J = 13.5$  Hz, 1H), 3.08 (d,  $J = 9.2$  Hz, 1H), 2.33 (s, 3H), 0.98 (s, 9H);

**$^{13}\text{C}$  NMR (100 MHz, acetone- $d_6$ )**  $\delta$  177.5, 161.4, 139.4, 136.3, 136.3, 135.4, 134.4, 134.2, 134.1, 131.9, 131.2, 130.5, 130.5, 129.5, 128.9, 128.8, 128.6, 127.9, 126.5, 125.7, 79.6, 78.1, 77.7, 64.5, 62.4, 39.5, 27.0, 21.1, 19.6;

**HRMS (ESI)  $m/z$ :** [M+Na] calcd. for  $\text{C}_{39}\text{H}_{41}\text{NO}_5\text{SiNa}$ , 654.2652; found, 654.2658.

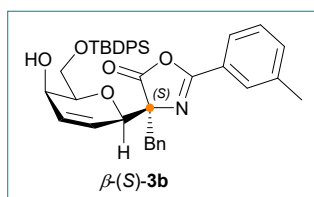

Compound  $\beta$ -(S)-**3b** was obtained as colorless syrup in 63% yield.

**$^1\text{H}$  NMR (400 MHz, acetone- $d_6$ )**  $\delta$  7.76 – 7.73 (m, 4H), 7.65 – 7.63 (m, 2H), 7.44 – 7.34 (m, 8H), 7.22 – 7.14 (m, 5H), 6.30 (ddd,  $J = 10.3, 5.8, 1.9$  Hz, 1H), 6.15 (dd,  $J = 10.3, 1.6$  Hz, 1H), 4.70 (d,  $J = 2.0$  Hz, 1H), 3.99 – 3.95 (m, 1H), 3.91 – 3.79 (m, 3H), 3.41 (d,  $J = 13.3$  Hz, 1H), 3.32 (d,  $J = 13.3$  Hz, 1H), 2.81 (d,  $J = 9.9$  Hz, 1H), 2.35 (s, 3H), 1.04 (s, 9H);

**$^{13}\text{C}$  NMR (100 MHz, acetone- $d_6$ )**  $\delta$  177.9, 162.0, 139.5, 136.3, 136.3, 135.1, 134.4, 134.3, 134.2, 131.8, 131.2, 130.5, 130.5, 129.6, 128.9, 128.8, 128.6, 128.6, 127.9, 127.8, 126.5, 125.7, 79.4, 78.1, 77.9, 64.6, 62.4, 39.5, 27.1, 21.1, 19.7;

**HRMS (ESI)  $m/z$ :** [M+Na] calcd. for  $\text{C}_{39}\text{H}_{41}\text{NO}_5\text{SiNa}$ , 654.2652; found, 654.2657.

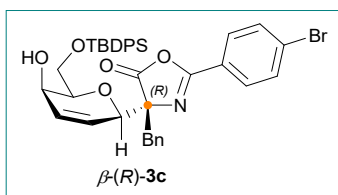

Compound  $\beta$ -(R)-3c was obtained as colorless syrup in 40% yield.

**$^1\text{H}$  NMR (400 MHz, acetone- $d_6$ )**  $\delta$  7.76 – 7.64 (m, 8H), 7.45 – 7.36 (m, 6H), 7.21 – 7.11 (m, 5H), 6.27 (ddd,  $J$  = 10.4, 5.6, 2.0 Hz, 1H), 6.16 (dd,  $J$  = 10.3, 1.5 Hz, 1H), 4.62 (d,  $J$  = 2.2 Hz, 1H), 4.00 – 3.91 (m, 2H), 3.88 – 3.75 (m, 2H), 3.42 (d,  $J$  = 13.5 Hz, 1H), 3.35 (d,  $J$  = 13.5 Hz, 1H), 3.13 (d,  $J$  = 9.0 Hz, 1H), 0.97 (s, 9H);

**$^{13}\text{C}$  NMR (100 MHz, acetone- $d_6$ )**  $\delta$  177.1, 160.6, 136.3, 136.3, 135.2, 134.3, 134.1, 132.9, 131.9, 131.1, 130.5, 130.5, 130.2, 128.8, 128.5, 127.9, 127.7, 127.7, 125.7, 79.7, 77.9, 77.8, 64.6, 62.4, 39.4, 27.0, 19.6;

**HRMS (ESI)  $m/z$ :** [M+Na] calcd. for  $\text{C}_{38}\text{H}_{38}\text{BrNO}_5\text{SiNa}$ , 718.1600; found, 718.1602.

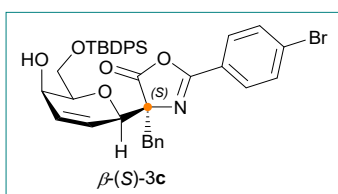

Compound  $\beta$ -(S)-3c was obtained as colorless syrup in 32% yield.

**$^1\text{H}$  NMR (400 MHz, acetone- $d_6$ )**  $\delta$  7.77 – 7.68 (m, 8H), 7.46 – 7.38 (m, 6H), 7.20 – 7.12 (m, 5H), 6.29 (ddd,  $J$  = 10.4, 5.7, 1.9 Hz, 1H), 6.18 (dd,  $J$  = 10.2, 1.6 Hz, 1H), 4.70 (d,  $J$  = 2.0 Hz, 1H), 3.98 – 3.95 (m, 1H), 3.89 – 3.77 (m, 3H), 3.43 (d,  $J$  = 13.4 Hz, 1H), 3.31 (d,  $J$  = 13.4 Hz, 1H), 2.87 (d,  $J$  = 8.8 Hz, 1H), 1.03 (s, 9H);

**$^{13}\text{C}$  NMR (100 MHz, acetone- $d_6$ )**  $\delta$  177.5, 161.2, 136.3, 136.3, 135.0, 134.3, 134.1, 133.0, 131.8, 131.2, 130.5, 130.3, 128.8, 128.6, 128.6, 128.0, 127.9, 127.7, 125.7, 79.5, 78.3, 77.9, 64.6, 62.4, 39.5, 27.1, 19.7;

**HRMS (ESI)  $m/z$ :** [M+Na] calcd. for  $\text{C}_{38}\text{H}_{38}\text{BrNO}_5\text{SiNa}$ , 718.1600; found, 718.1602.

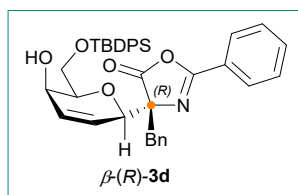

Compound  $\beta(R)$ -**3d** was obtained as colorless syrup in 29% yield.

**$^1\text{H}$  NMR (400 MHz, acetone- $d_6$ )**  $\delta$  7.85 – 7.82 (m, 2H), 7.76 – 7.69 (m, 4H), 7.59 – 7.55 (m, 1H), 7.48 – 7.36 (m, 8H), 7.22 – 7.10 (m, 5H), 6.27 (ddd,  $J = 10.3, 5.7, 2.1$  Hz, 1H), 6.13 (dd,  $J = 10.3, 1.7$  Hz, 1H), 4.62 (d,  $J = 1.9$  Hz, 1H), 4.00 – 3.92 (m, 2H), 3.88 – 3.79 (m, 2H), 3.43 (d,  $J = 13.5$  Hz, 1H), 3.34 (d,  $J = 13.5$  Hz, 1H), 3.17 (d,  $J = 9.3$  Hz, 1H), 0.98 (s, 9H);

**$^{13}\text{C}$  NMR (100 MHz, acetone- $d_6$ )**  $\delta$  178.0, 162.0, 159.7, 144.4, 136.3, 136.3, 134.3, 134.2, 132.3, 131.8, 130.5, 130.3, 128.6, 128.6, 128.5, 127.8, 126.8, 123.8, 114.1, 79.3, 78.2, 77.8, 64.5, 62.4, 55.3, 38.7, 27.1, 21.5, 19.7;

**HRMS (ESI)  $m/z$ :**  $[M+Na]$  calcd. for  $\text{C}_{38}\text{H}_{39}\text{NO}_5\text{SiNa}$ , 640.2495; found, 640.2502.

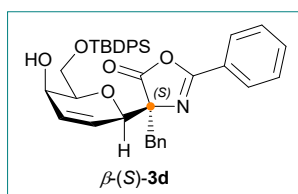

Compound  $\beta(S)$ -**3d** was obtained as colorless syrup in 58% yield.

**$^1\text{H}$  NMR (400 MHz, acetone- $d_6$ )**  $\delta$  7.84 (dd,  $J = 8.0, 1.4$  Hz, 2H), 7.76 – 7.73 (m, 4H), 7.62 – 7.58 (m, 1H), 7.50 – 7.38 (m, 8H), 7.22 – 7.13 (m, 5H), 6.30 (ddd,  $J = 10.3, 5.7, 2.0$  Hz, 1H), 6.16 (dd,  $J = 10.2, 1.6$  Hz, 1H), 4.70 (d,  $J = 1.9$  Hz, 1H), 3.97 (ddd,  $J = 9.8, 5.7, 1.7$  Hz, 1H), 3.91 – 3.80 (m, 3H), 3.43 (d,  $J = 13.3$  Hz, 1H), 3.32 (d,  $J = 13.3$  Hz, 1H), 2.85 (d,  $J = 9.8$  Hz, 1H), 1.04 (s, 9H);

**$^{13}\text{C}$  NMR (100 MHz, acetone- $d_6$ )**  $\delta$  177.8, 161.9, 136.3, 136.3, 135.1, 134.3, 134.1, 133.6, 131.8, 131.2, 130.5, 130.5, 129.6, 128.8, 128.6, 128.5, 128.5, 127.9, 127.8, 126.6, 79.4, 78.1, 77.8, 64.6, 62.4, 39.5, 27.1, 19.7;

**HRMS (ESI)  $m/z$ :**  $[M+Na]$  calcd. for  $\text{C}_{38}\text{H}_{39}\text{NO}_5\text{SiNa}$ , 640.2495; found, 640.2499.

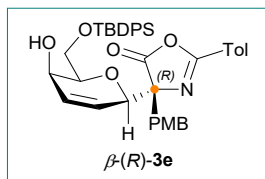

Compound  $\beta$ -(R)-3e was obtained as colorless syrup in 29% yield.

**$^1\text{H}$  NMR (400 MHz, acetone- $d_6$ )**  $\delta$  7.76 – 7.70 (m, 6H), 7.47 – 7.37 (m, 6H), 7.27 (d,  $J$  = 8.0 Hz, 2H), 7.11 (d,  $J$  = 8.3 Hz, 2H), 6.72 (d,  $J$  = 8.5 Hz, 2H), 6.26 (ddd,  $J$  = 10.3, 5.7, 2.0 Hz, 1H), 6.07 (dd,  $J$  = 10.3, 1.6 Hz, 1H), 4.58 (d,  $J$  = 2.2 Hz, 1H), 3.99 – 3.93 (m, 2H), 3.89 – 3.75 (m, 2H), 3.66 (s, 3H), 3.35 (d,  $J$  = 13.7 Hz, 1H), 3.25 (d,  $J$  = 13.7 Hz, 1H), 3.18 (d,  $J$  = 9.5 Hz, 1H), 2.36 (s, 3H), 1.00 (s, 9H);

**$^{13}\text{C}$  NMR (100 MHz, acetone- $d_6$ )**  $\delta$  177.6, 161.4, 159.7, 144.3, 136.3, 136.3, 134.4, 134.1, 132.2, 131.8, 130.5, 130.5, 130.2, 128.6, 128.5, 127.9, 127.0, 123.8, 114.1, 79.5, 78.0, 77.8, 64.5, 62.4, 55.3, 38.7, 27.1, 21.5, 19.7;

**HRMS (ESI)  $m/z$ :** [M+Na] calcd. for  $\text{C}_{40}\text{H}_{43}\text{NO}_6\text{SiNa}$ , 684.2757; found, 684.2765.

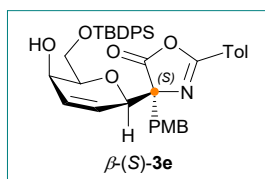

Compound  $\beta$ -(S)-3e was obtained as colorless syrup in 64% yield.

**$^1\text{H}$  NMR (400 MHz, acetone- $d_6$ )**  $\delta$  7.76 – 7.72 (m, 6H), 7.46 – 7.38 (m, 6H), 7.30 – 7.28 (m, 2H), 7.11 – 7.09 (m, 2H), 6.71 (d,  $J$  = 8.3 Hz, 2H), 6.30 (ddd,  $J$  = 10.5, 5.9, 2.0 Hz, 1H), 6.13 (dd,  $J$  = 10.4, 1.6 Hz, 1H), 4.67 (s, 1H), 3.98 – 3.94 (m, 1H), 3.90 – 3.79 (m, 3H), 3.66 (s, 3H), 3.33 (d,  $J$  = 13.5 Hz, 1H), 3.25 (d,  $J$  = 13.5 Hz, 1H), 2.83 (d,  $J$  = 10.1 Hz, 1H), 2.37 (s, 3H), 1.05 (s, 9H);

**$^{13}\text{C}$  NMR (100 MHz, acetone- $d_6$ )**  $\delta$  178.0, 162.0, 159.7, 144.4, 136.3, 136.3, 134.3, 134.2, 132.3, 131.8, 130.5, 130.3, 128.6, 128.6, 128.5, 127.8, 126.8, 123.8, 114.1, 79.3, 78.2, 77.8, 64.5, 62.4, 55.3, 38.7, 27.1, 21.5, 19.7;

**HRMS (ESI)  $m/z$ :** [M+Na] calcd. for  $\text{C}_{40}\text{H}_{43}\text{NO}_6\text{SiNa}$ , 684.2757; found, 684.2761.

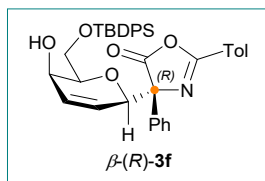

Compound  $\beta$ -(R)-**3f** was obtained as colorless syrup in 21% yield.

**$^1\text{H}$  NMR (400 MHz, acetone- $d_6$ )**  $\delta$  7.92 (d,  $J$  = 8.1 Hz, 2H), 7.78 – 7.75 (m, 2H), 7.70 – 7.68 (m, 2H), 7.63 – 7.61 (m, 2H), 7.49 – 7.33 (m, 11H), 6.19 (ddd,  $J$  = 10.3, 5.8, 2.2 Hz, 1H), 5.63 (dd,  $J$  = 10.3, 1.6 Hz, 1H), 4.83 (d,  $J$  = 2.0 Hz, 1H), 3.93 (ddt,  $J$  = 7.5, 5.8, 1.8 Hz, 1H), 3.85 (dd,  $J$  = 8.9, 4.1 Hz, 1H), 3.78 – 3.71 (m, 2H), 2.68 (d,  $J$  = 9.4 Hz, 1H), 2.39 (s, 3H), 0.93 (s, 9H);

**$^{13}\text{C}$  NMR (100 MHz, acetone- $d_6$ )**  $\delta$  176.2, 161.7, 144.5, 136.3, 136.3, 135.4, 134.3, 134.0, 131.9, 130.5, 130.3, 129.6, 129.5, 128.8, 128.6, 128.5, 127.7, 127.2, 123.9, 79.9, 79.4, 78.4, 64.3, 62.2, 27.0, 21.6, 19.6;

**HRMS (ESI)  $m/z$ :** [M+Na] calcd. for  $\text{C}_{38}\text{H}_{39}\text{NO}_5\text{SiNa}$ , 640.2495; found, 640.2505.

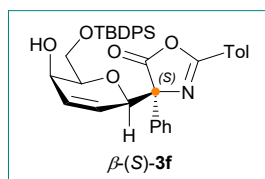

Compound  $\beta$ -(S)-**3f** was obtained as colorless syrup in 69% yield.

**$^1\text{H}$  NMR (400 MHz, acetone- $d_6$ )**  $\delta$  7.97 (d,  $J$  = 8.0 Hz, 2H), 7.80 – 7.78 (m, 2H), 7.72 – 7.68 (m, 4H), 7.49 – 7.37 (m, 11H), 6.19 (ddd,  $J$  = 10.2, 5.8, 1.9 Hz, 1H), 5.60 (dd,  $J$  = 10.4, 1.7 Hz, 1H), 5.01 (d,  $J$  = 2.0 Hz, 1H), 3.95 – 3.90 (m, 1H), 3.87 – 3.80 (m, 2H), 3.74 – 3.70 (m, 1H), 2.81 (d,  $J$  = 9.4 Hz, 1H), 2.43 (s, 3H), 1.02 (s, 9H);

**$^{13}\text{C}$  NMR (100 MHz, acetone- $d_6$ )**  $\delta$  177.6, 162.4, 144.7, 136.2, 136.2, 135.8, 134.3, 134.0, 131.3, 130.5, 130.4, 130.4, 129.6, 129.6, 128.8, 128.6, 128.5, 127.2, 127.1, 123.9, 80.7, 79.4, 77.3, 64.5, 62.1, 27.1, 21.6, 19.6;

**HRMS (ESI)  $m/z$ :** [M+Na] calcd. for  $\text{C}_{38}\text{H}_{39}\text{NO}_5\text{SiNa}$ , 640.2495; found, 640.2498.

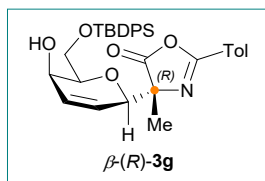

Compound  $\beta$ -(R)-3g was obtained as colorless syrup in 32% yield.

**$^1\text{H}$  NMR (400 MHz, acetone- $d_6$ )**  $\delta$  7.85 (d,  $J$  = 8.0 Hz, 2H), 7.73 – 7.70 (m, 2H), 7.67 – 7.65 (m, 2H), 7.46 – 7.32 (m, 8H), 6.24 (ddd,  $J$  = 10.3, 5.7, 2.1 Hz, 1H), 6.05 (dd,  $J$  = 10.3, 1.6 Hz, 1H), 4.45 (d,  $J$  = 2.0 Hz, 1H), 3.97 – 3.93 (m, 1H), 3.90 – 3.85 (m, 1H), 3.77 – 3.72 (m, 2H), 2.89 (d,  $J$  = 9.4 Hz, 1H), 2.39 (s, 3H), 1.56 (s, 3H), 0.96 (s, 9H);

**$^{13}\text{C}$  NMR (100 MHz, acetone- $d_6$ )**  $\delta$  178.7, 161.3, 144.2, 136.3, 136.3, 134.3, 134.1, 131.6, 130.5, 130.5, 130.2, 128.6, 128.5, 127.8, 124.2, 79.3, 78.6, 72.8, 64.3, 62.3, 27.0, 21.5, 19.8, 19.6;

**HRMS (ESI)  $m/z$ :** [M+Na] calcd. for  $\text{C}_{33}\text{H}_{37}\text{NO}_5\text{SiNa}$ , 578.2339; found, 578.2342.

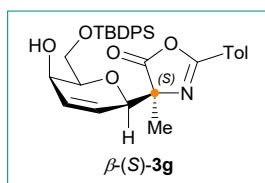

Compound  $\beta$ -(S)-3g was obtained as colorless syrup in 56% yield.

**$^1\text{H}$  NMR (400 MHz, acetone- $d_6$ )**  $\delta$  7.85 (d,  $J$  = 7.9 Hz, 2H), 7.72 – 7.69 (m, 4H), 7.45 – 7.34 (m, 8H), 6.27 (ddd,  $J$  = 10.4, 5.8, 1.9 Hz, 1H), 6.13 (dd,  $J$  = 10.2, 1.7 Hz, 1H), 4.53 (d,  $J$  = 2.0 Hz, 1H), 3.96 – 3.91 (m, 1H), 3.83 – 3.76 (m, 2H), 3.73 – 3.67 (m, 1H), 2.73 (d,  $J$  = 9.8 Hz, 1H), 2.41 (s, 3H), 1.56 (s, 3H), 1.01 (s, 9H);

**$^{13}\text{C}$  NMR (100 MHz, acetone- $d_6$ )**  $\delta$  179.5, 161.8, 144.3, 136.3, 136.2, 134.3, 134.1, 131.4, 130.5, 130.3, 128.6, 128.6, 128.5, 127.6, 124.2, 79.1, 78.5, 72.8, 64.4, 62.3, 27.1, 21.6, 19.7, 19.6;

**HRMS (ESI)  $m/z$ :** [M+H] calcd. for  $\text{C}_{33}\text{H}_{38}\text{NO}_5\text{Si}$ , 556.2519; found, 556.2519.

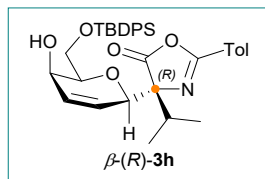

Compound  $\beta$ -(*R*)-**3h** was obtained as colorless syrup in 21% yield.

**<sup>1</sup>H NMR (400 MHz, acetone-*d*<sub>6</sub>)**  $\delta$  7.87 (d,  $J$  = 8.0 Hz, 2H), 7.70 – 7.68 (m, 2H), 7.65 – 7.63 (m, 2H), 7.45 – 7.32 (m, 8H), 6.24 (ddd,  $J$  = 10.4, 5.7, 2.1 Hz, 1H), 6.03 (dd,  $J$  = 10.3, 1.5 Hz, 1H), 4.66 (d,  $J$  = 2.0 Hz, 1H), 3.94 – 3.90 (m, 1H), 3.86 – 3.79 (m, 1H), 3.76 – 3.70 (m, 2H), 2.75 (d,  $J$  = 9.6 Hz, 1H), 2.49 (hept,  $J$  = 7.1 Hz, 1H), 2.39 (s, 3H), 1.09 (d,  $J$  = 6.8 Hz, 3H), 0.94 (s, 9H), 0.90 (d,  $J$  = 6.7 Hz, 3H);

**<sup>13</sup>C NMR (100 MHz, acetone-*d*<sub>6</sub>)**  $\delta$  178.5, 161.8, 144.3, 136.3, 134.3, 134.0, 131.9, 130.5, 130.3, 128.7, 128.5, 127.2, 123.9, 80.2, 79.4, 76.5, 64.4, 62.4, 32.1, 27.0, 21.5, 19.6, 17.3, 17.0;

**HRMS (ESI)  $m/z$ :** [M+Na] calcd. for C<sub>35</sub>H<sub>41</sub>NO<sub>5</sub>SiNa, 606.2652; found, 606.2658.

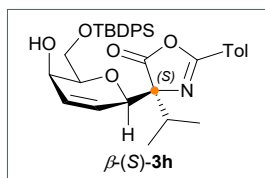

Compound  $\beta$ -(*S*)-**3h** was obtained as colorless syrup in 59% yield.

**<sup>1</sup>H NMR (400 MHz, acetone-*d*<sub>6</sub>)**  $\delta$  7.89 (d,  $J$  = 8.0 Hz, 2H), 7.76 – 7.73 (m, 4H), 7.48 – 7.38 (m, 8H), 6.25 (ddd,  $J$  = 10.2, 5.9, 1.9 Hz, 1H), 5.85 (dd,  $J$  = 10.2, 1.7 Hz, 1H), 4.74 (d,  $J$  = 1.9 Hz, 1H), 3.94 – 3.78 (m, 4H), 2.61 (hept,  $J$  = 7.1 Hz, 1H), 2.57 (d,  $J$  = 10.4 Hz, 1H), 2.43 (s, 3H), 1.07 – 1.04 (m, 12H), 0.96 (d,  $J$  = 6.8 Hz, 3H);

**<sup>13</sup>C NMR (100 MHz, acetone-*d*<sub>6</sub>)**  $\delta$  178.7, 162.4, 144.6, 136.3, 136.3, 134.3, 134.2, 132.2, 130.5, 130.5, 128.7, 128.6, 127.7, 123.7, 79.7, 79.2, 75.3, 64.5, 62.3, 31.7, 27.1, 21.6, 19.7, 17.1, 16.7;

**HRMS (ESI)  $m/z$ :** [M+Na] calcd. for C<sub>35</sub>H<sub>41</sub>NO<sub>5</sub>SiNa, 606.2652; found, 606.2656.



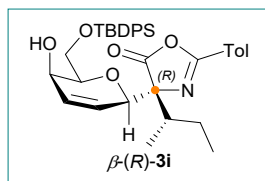

Compound  $\beta$ -(*R*)-**3i** was obtained as colorless syrup in 28% yield.

**$^1\text{H}$  NMR (400 MHz, acetone- $d_6$ )**  $\delta$  7.87 (d,  $J$  = 7.9 Hz, 2H), 7.69 – 7.67 (m, 2H), 7.63 – 7.60 (m, 2H), 7.43 – 7.31 (m, 8H), 6.26 (ddd,  $J$  = 10.4, 5.8, 2.0 Hz, 1H), 6.09 (d,  $J$  = 10.4 Hz, 1H), 4.68 (d,  $J$  = 2.0 Hz, 1H), 3.91 (dd,  $J$  = 9.1, 6.3 Hz, 1H), 3.84 – 3.77 (m, 1H), 3.73 – 3.67 (m, 2H), 2.59 (d,  $J$  = 9.7 Hz, 1H), 2.38 (s, 3H), 2.18 (ddt,  $J$  = 10.4, 7.0, 3.5 Hz, 1H), 1.12 – 1.00 (m, 5H), 0.92 – 0.86 (m, 12H);

**$^{13}\text{C}$  NMR (100 MHz, acetone- $d_6$ )**  $\delta$  178.9, 161.6, 144.2, 136.2, 134.3, 134.0, 131.9, 130.5, 130.3, 128.6, 128.5, 128.5, 127.1, 124.0, 80.9, 79.3, 76.5, 64.3, 62.4, 38.9, 27.0, 24.9, 21.5, 19.6, 13.2, 11.9;

**HRMS (ESI)  $m/z$ :** [M+Na] calcd. for  $\text{C}_{36}\text{H}_{43}\text{NO}_5\text{SiNa}$ , 620.2808; found, 620.2814.

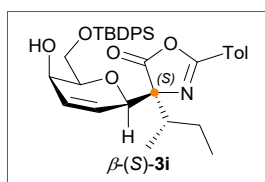

Compound  $\beta$ -(*S*)-**3i** was obtained as colorless syrup in 49% yield.

**$^1\text{H}$  NMR (400 MHz, acetone- $d_6$ )**  $\delta$  7.88 (d,  $J$  = 8.0 Hz, 2H), 7.74 – 7.72 (m, 4H), 7.45 – 7.37 (m, 8H), 6.26 (ddd,  $J$  = 10.2, 5.9, 1.9 Hz, 1H), 5.90 (dd,  $J$  = 10.2, 1.7 Hz, 1H), 4.81 (d,  $J$  = 2.0 Hz, 1H), 3.91 (dd,  $J$  = 10.4, 6.0 Hz, 1H), 3.86 – 3.80 (m, 3H), 2.57 (d,  $J$  = 10.5 Hz, 1H), 2.43 (s, 3H), 2.33 (dq,  $J$  = 10.1, 7.0, 3.1 Hz, 1H), 1.68 (dq,  $J$  = 15.0, 7.4, 2.9 Hz, 1H), 1.19 (ddd,  $J$  = 13.4, 10.4, 7.1 Hz, 1H), 1.03 (s, 9H), 0.99 (d,  $J$  = 6.9 Hz, 3H), 0.89 (t,  $J$  = 7.4 Hz, 3H);

**$^{13}\text{C}$  NMR (100 MHz, acetone- $d_6$ )**  $\delta$  178.6, 162.4, 144.6, 136.3, 136.3, 134.2, 134.1, 132.1, 130.5, 130.4, 128.6, 128.6, 128.6, 127.7, 123.7, 79.8, 79.1, 75.3, 64.5, 62.3, 38.0, 27.1, 23.8, 21.6, 19.6, 12.7, 11.9;

**HRMS (ESI)  $m/z$ :** [M+Na] calcd. for  $\text{C}_{36}\text{H}_{43}\text{NO}_5\text{SiNa}$ , 620.2808; found, 620.2812.

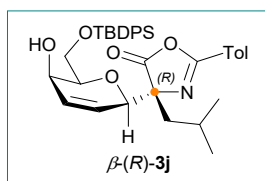

Compound  $\beta$ -(*R*)-**3j** was obtained as colorless syrup in 32% yield.

**$^1\text{H}$  NMR (400 MHz, acetone- $d_6$ )**  $\delta$  7.88 (d,  $J$  = 8.0 Hz, 2H), 7.72 – 7.69 (m, 2H), 7.66 – 7.64 (m, 2H), 7.46 – 7.32 (m, 8H), 6.23 (ddd,  $J$  = 10.3, 5.7, 2.1 Hz, 1H), 6.03 (dd,  $J$  = 10.4, 1.1 Hz, 1H), 4.46 (d,  $J$  = 2.3 Hz, 1H), 3.93 (dd,  $J$  = 8.9, 6.1 Hz, 1H), 3.85 (dt,  $J$  = 9.9, 5.0 Hz, 1H), 3.76 – 3.70 (m, 2H), 2.83 (d,  $J$  = 9.4 Hz, 1H), 2.39 (s, 3H), 2.14 (dd,  $J$  = 14.0, 4.9 Hz, 1H), 1.83 (dd,  $J$  = 14.0, 8.0 Hz, 1H), 1.68 – 1.59 (m, 1H), 0.95 (s, 9H), 0.91 (d,  $J$  = 6.7 Hz, 3H), 0.82 (d,  $J$  = 6.6 Hz, 3H);

**$^{13}\text{C}$  NMR (100 MHz, acetone- $d_6$ )**  $\delta$  179.1, 161.3, 144.3, 136.3, 136.3, 134.3, 134.0, 131.8, 130.5, 130.5, 130.3, 128.6, 128.5, 127.6, 124.1, 79.3, 78.9, 76.2, 64.3, 62.3, 42.1, 27.0, 25.4, 24.4, 23.0, 21.5, 19.6;

**HRMS (ESI)  $m/z$ :** [M+Na] calcd. for  $\text{C}_{36}\text{H}_{43}\text{NO}_5\text{SiNa}$ , 620.2808; found, 620.2808.

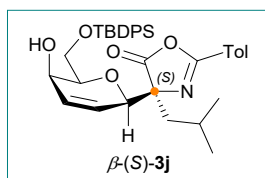

Compound  $\beta$ -(*S*)-**3j** was obtained as colorless syrup in 45% yield.

**$^1\text{H}$  NMR (400 MHz, acetone- $d_6$ )**  $\delta$  7.87 (d,  $J$  = 8.0 Hz, 2H), 7.73 – 7.71 (m, 4H), 7.45 – 7.36 (m, 8H), 6.24 (ddd,  $J$  = 10.4, 5.8, 1.9 Hz, 1H), 6.06 (dd,  $J$  = 10.3, 1.6 Hz, 1H), 4.50 (d,  $J$  = 2.0 Hz, 1H), 3.93 – 3.89 (m, 1H), 3.83 – 3.71 (m, 3H), 2.68 (d,  $J$  = 9.8 Hz, 1H), 2.42 (s, 3H), 2.08 (dd,  $J$  = 14.1, 6.0 Hz, 1H), 1.92 (dd,  $J$  = 14.1, 6.6 Hz, 1H), 1.64 – 1.55 (m, 1H), 1.02 (s, 9H), 0.88 (d,  $J$  = 6.6 Hz, 3H), 0.85 (d,  $J$  = 6.6 Hz, 3H);

**$^{13}\text{C}$  NMR (100 MHz, acetone- $d_6$ )**  $\delta$  179.4, 161.9, 144.5, 136.3, 136.3, 134.3, 134.1, 131.6, 130.5, 130.4, 128.6, 128.6, 128.5, 127.9, 124.0, 79.2, 78.7, 76.6, 64.4, 62.3, 42.0, 27.1, 25.5, 24.2, 23.6, 21.6, 19.6;

**HRMS (ESI)  $m/z$ :** [M+Na] calcd. for  $\text{C}_{36}\text{H}_{43}\text{NO}_5\text{SiNa}$ , 620.2808; found, 620.2814.

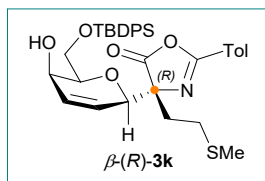

Compound  $\beta$ -(*R*)-**3k** was obtained as colorless syrup in 36% yield.

**<sup>1</sup>H NMR (400 MHz, acetone-*d*<sub>6</sub>)**  $\delta$  7.88 (d, *J* = 8.0 Hz, 2H), 7.73 – 7.71 (m, 2H), 7.68 – 7.66 (m, 2H), 7.46 – 7.32 (m, 8H), 6.24 (ddd, *J* = 10.3, 5.8, 2.1 Hz, 1H), 6.02 (dd, *J* = 10.7, 1.7 Hz, 1H), 4.50 (d, *J* = 2.0 Hz, 1H), 3.96 – 3.92 (m, 1H), 3.90 – 3.85 (m, 1H), 3.79 – 3.71 (m, 2H), 2.97 (d, *J* = 9.3 Hz, 1H), 2.58 – 2.51 (m, 1H), 2.46 – 2.28 (m, 6H), 2.00 (s, 3H), 0.97 (s, 9H);

**<sup>13</sup>C NMR (100 MHz, acetone-*d*<sub>6</sub>)**  $\delta$  178.4, 162.3, 144.4, 136.3, 136.3, 134.3, 134.1, 131.9, 130.5, 130.5, 130.3, 128.7, 128.5, 127.5, 124.1, 79.4, 78.3, 75.5, 64.3, 62.3, 32.4, 29.2, 27.0, 21.6, 19.6, 14.8;

**HRMS (ESI) *m/z*:** [M+Na] calcd. for C<sub>35</sub>H<sub>41</sub>NO<sub>5</sub>SSiNa, 638.2372; found, 638.2374.

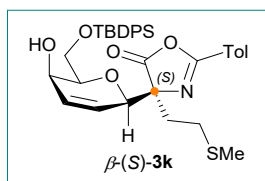

Compound  $\beta$ -(*S*)-**3k** was obtained as colorless syrup in 49% yield.

**<sup>1</sup>H NMR (400 MHz, acetone-*d*<sub>6</sub>)** 7.87 (d, *J* = 8.0 Hz, 2H), 7.74 – 7.72 (m, 4H), 7.46 – 7.35 (m, 8H), 6.25 (ddd, *J* = 10.4, 5.7, 1.9 Hz, 1H), 6.06 (dd, *J* = 10.3, 1.6 Hz, 1H), 4.57 (d, *J* = 2.0 Hz, 1H), 3.95 – 3.91 (m, 1H), 3.86 – 3.73 (m, 3H), 2.75 (d, *J* = 9.7 Hz, 1H), 2.55 – 2.48 (m, 1H), 2.44 – 2.31 (m, 6H), 2.01 (s, 3H), 1.03 (s, 9H);

**<sup>13</sup>C NMR (100 MHz, acetone-*d*<sub>6</sub>)**  $\delta$  178.8, 162.7, 144.5, 136.3, 136.3, 134.3, 134.1, 131.8, 130.5, 130.4, 128.7, 128.6, 128.5, 127.7, 124.0, 79.3, 78.1, 76.0, 64.4, 62.3, 32.7, 28.9, 27.1, 21.6, 19.6, 14.9;

**HRMS (ESI) *m/z*:** [M+Na] calcd. for C<sub>35</sub>H<sub>41</sub>NO<sub>5</sub>SSiNa, 638.2372; found, 638.2377.

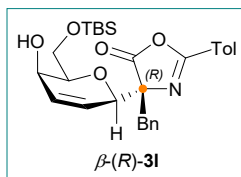

Compound  $\beta$ -(*R*)-**3I** was obtained as colorless syrup in 32% yield.

**<sup>1</sup>H NMR (400 MHz, acetone-*d*<sub>6</sub>)**  $\delta$  7.73 (d, *J* = 8.0 Hz, 2H), 7.30 (d, *J* = 8.0 Hz, 2H), 7.21 – 7.10 (m, 5H), 6.27 (ddd, *J* = 10.4, 5.8, 2.0 Hz, 1H), 6.11 (dd, *J* = 10.2, 1.6 Hz, 1H), 4.59 (d, *J* = 2.1 Hz, 1H), 3.93 – 3.89 (m, 1H), 3.85 (dd, *J* = 10.5, 5.6 Hz, 1H), 3.72 (dd, *J* = 10.5, 6.3 Hz, 1H), 3.61 (ddd, *J* = 7.1, 4.0, 1.5 Hz, 1H), 3.40 (d, *J* = 13.4 Hz, 1H), 3.33 (d, *J* = 13.5 Hz, 1H), 2.99 (d, *J* = 9.4 Hz, 1H), 2.38 (s, 3H), 0.84 (s, 9H), 0.00 (s, 6H);

**<sup>13</sup>C NMR (100 MHz, acetone-*d*<sub>6</sub>)**  $\delta$  177.6, 161.3, 144.3, 135.3, 132.0, 131.2, 130.2, 128.8, 128.5, 127.8, 127.7, 123.8, 79.6, 78.0, 77.7, 63.7, 62.2, 39.6, 26.2, 21.5, 18.8, -5.1, -5.4;

**HRMS (ESI) *m/z***: [M+Na] calcd. for C<sub>29</sub>H<sub>37</sub>NO<sub>5</sub>SiNa, 530.2339; found, 530.2342.

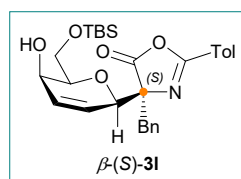

Compound  $\beta$ -(*S*)-**3I** was obtained as colorless syrup in 67% yield.

**<sup>1</sup>H NMR (400 MHz, acetone-*d*<sub>6</sub>)**  $\delta$  7.73 (d, *J* = 8.1 Hz, 2H), 7.31 (d, *J* = 8.0 Hz, 2H), 7.21 – 7.12 (m, 5H), 6.30 (ddd, *J* = 10.3, 5.9, 1.9 Hz, 1H), 6.13 (dd, *J* = 10.2, 1.7 Hz, 1H), 4.66 (d, *J* = 2.0 Hz, 1H), 3.90 – 3.86 (m, 1H), 3.77 (dd, *J* = 10.1, 5.6 Hz, 1H), 3.71 – 3.62 (m, 2H), 3.40 (d, *J* = 13.3 Hz, 1H), 3.28 (d, *J* = 13.3 Hz, 1H), 2.69 (d, *J* = 10.0 Hz, 1H), 2.39 (s, 3H), 0.89 (s, 9H), 0.06 (s, 3H), 0.05 (s, 3H);

**<sup>13</sup>C NMR (100 MHz, acetone-*d*<sub>6</sub>)**  $\delta$  177.9, 162.0, 144.4, 135.1, 131.9, 131.2, 130.3, 128.8, 128.5, 127.9, 127.7, 123.8, 79.2, 78.1, 77.8, 63.5, 62.1, 39.5, 26.2, 21.5, 18.8, -5.2, -5.4;

**HRMS (ESI) *m/z***: [M+H] calcd. for C<sub>29</sub>H<sub>38</sub>NO<sub>5</sub>Si, 508.2519; found, 508.2517.

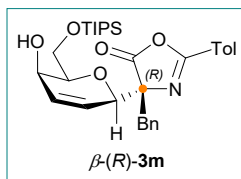

Compound  $\beta$ -(R)-3m was obtained as colorless syrup in 33% yield.

$^1\text{H NMR}$  (400 MHz, acetone- $d_6$ )  $\delta$  7.72 (d,  $J = 8.0$  Hz, 2H), 7.30 (d,  $J = 8.0$  Hz, 2H), 7.21 – 7.10 (m, 5H), 6.28 (ddd,  $J = 10.4, 5.8, 2.0$  Hz, 1H), 6.08 (dd,  $J = 10.3, 1.6$  Hz, 1H), 4.61 (d,  $J = 2.0$  Hz, 1H), 3.98 – 3.93 (m, 2H), 3.83 (dd,  $J = 10.2, 6.2$  Hz, 1H), 3.66 (td,  $J = 6.0, 1.7$  Hz, 1H), 3.42 (d,  $J = 13.4$  Hz, 1H), 3.32 (d,  $J = 13.5$  Hz, 1H), 3.02 (d,  $J = 9.5$  Hz, 1H), 2.38 (s, 3H), 1.11 – 0.97 (m, 21H);

$^{13}\text{C NMR}$  (100 MHz, acetone- $d_6$ )  $\delta$  177.6, 161.3, 144.3, 135.3, 132.0, 131.2, 130.2, 128.8, 128.5, 127.8, 127.7, 123.8, 79.7, 78.1, 77.8, 64.0, 62.3, 39.6, 21.5, 18.3, 12.6;

HRMS (ESI)  $m/z$ :  $[M+Na]$  calcd. for  $\text{C}_{32}\text{H}_{43}\text{NO}_5\text{SiNa}$ , 572.2808; found, 572.2813.

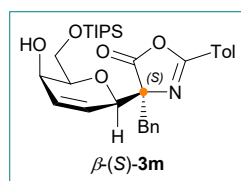

Compound  $\beta$ -(S)-3m was obtained as colorless syrup in 65% yield.

$^1\text{H NMR}$  (400 MHz, acetone- $d_6$ )  $\delta$  7.73 (d,  $J = 8.1$  Hz, 2H), 7.31 (d,  $J = 7.9$  Hz, 2H), 7.21 – 7.12 (m, 5H), 6.31 (ddd,  $J = 10.3, 5.9, 1.9$  Hz, 1H), 6.13 (dd,  $J = 10.2, 1.7$  Hz, 1H), 4.68 (d,  $J = 2.0$  Hz, 1H), 3.94 – 3.85 (m, 2H), 3.79 (dd,  $J = 10.1, 6.2$  Hz, 1H), 3.69 (td,  $J = 6.1, 1.6$  Hz, 1H), 3.40 (d,  $J = 13.3$  Hz, 1H), 3.29 (d,  $J = 13.3$  Hz, 1H), 2.73 (d,  $J = 10.1$  Hz, 1H), 2.39 (s, 3H), 1.15 – 1.01 (m, 21H);

$^{13}\text{C NMR}$  (100 MHz, acetone- $d_6$ )  $\delta$  177.9, 162.0, 144.4, 135.2, 132.0, 131.2, 130.3, 128.8, 128.5, 127.9, 127.7, 123.8, 79.3, 78.1, 77.8, 63.9, 62.2, 39.5, 21.5, 18.3, 18.3, 12.6;

HRMS (ESI)  $m/z$ :  $[M+H]$  calcd. for  $\text{C}_{32}\text{H}_{44}\text{NO}_5\text{Si}$ , 550.2989; found, 550.2993.

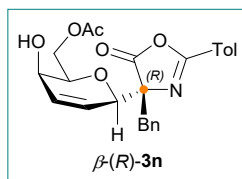

Compound  $\beta$ -(R)-3n was obtained as colorless syrup in 34% yield.

**$^1\text{H}$  NMR (400 MHz, acetone- $d_6$ )**  $\delta$  7.74 (d,  $J$  = 8.3 Hz, 2H), 7.31 (d,  $J$  = 7.8 Hz, 2H), 7.22 – 7.11 (m, 5H), 6.24 (ddd,  $J$  = 10.3, 5.6, 2.1 Hz, 1H), 6.12 (dd,  $J$  = 10.3, 1.7 Hz, 1H), 4.54 (d,  $J$  = 2.0 Hz, 1H), 4.30 (dd,  $J$  = 11.6, 7.6 Hz, 1H), 4.16 (dd,  $J$  = 11.6, 4.7 Hz, 1H), 3.93 (ddt,  $J$  = 7.7, 5.7, 2.1 Hz, 1H), 3.80 (ddd,  $J$  = 7.2, 4.7, 2.2 Hz, 1H), 3.51 (d,  $J$  = 9.2 Hz, 1H), 3.39 (d,  $J$  = 13.5 Hz, 1H), 3.34 (d,  $J$  = 13.5 Hz, 1H), 2.39 (s, 3H), 1.89 (s, 3H);

**$^{13}\text{C}$  NMR (100 MHz, acetone- $d_6$ )**  $\delta$  177.3, 170.8, 161.5, 144.3, 135.3, 131.4, 131.2, 130.2, 128.8, 128.5, 127.8, 127.8, 123.8, 77.7, 77.4, 76.7, 64.3, 62.3, 39.2, 21.5, 20.6;

**HRMS (ESI)  $m/z$ :** [M+H] calcd. for  $\text{C}_{25}\text{H}_{26}\text{NO}_6$ , 436.1760; found, 436.1763.

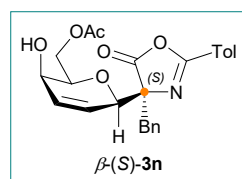

Compound  $\beta$ -(S)-3n was obtained as colorless syrup in 60% yield.

**$^1\text{H}$  NMR (400 MHz, acetone- $d_6$ )**  $\delta$  7.74 (d,  $J$  = 8.0 Hz, 2H), 7.31 (d,  $J$  = 7.9 Hz, 2H), 7.23 – 7.13 (m, 5H), 6.26 (ddd,  $J$  = 10.3, 5.7, 1.9 Hz, 1H), 6.14 (dd,  $J$  = 10.3, 1.6 Hz, 1H), 4.63 (d,  $J$  = 2.2 Hz, 1H), 4.21 – 4.12 (m, 2H), 3.92 – 3.88 (m, 1H), 3.82 (ddd,  $J$  = 7.0, 4.8, 1.8 Hz, 1H), 3.42 (d,  $J$  = 13.3 Hz, 1H), 3.27 (d,  $J$  = 13.3 Hz, 1H), 3.08 (d,  $J$  = 9.6 Hz, 1H), 2.39 (s, 3H), 2.01 (s, 3H);

**$^{13}\text{C}$  NMR (100 MHz, acetone- $d_6$ )**  $\delta$  177.1, 170.0, 161.2, 143.6, 134.3, 130.5, 130.4, 129.5, 128.0, 127.7, 127.1, 127.0, 123.0, 77.1, 76.7, 75.7, 63.6, 61.5, 38.7, 20.7, 19.9;

**HRMS (ESI)  $m/z$ :** [M+H] calcd. for  $\text{C}_{25}\text{H}_{26}\text{NO}_6$ , 436.1760; found, 436.1757.

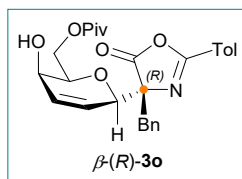

Compound  $\beta$ -(R)-**3o** was obtained as colorless syrup in 35% yield.

**<sup>1</sup>H NMR (400 MHz, acetone-*d*<sub>6</sub>)**  $\delta$  7.73 (d, *J* = 8.0 Hz, 2H), 7.30 (d, *J* = 7.9 Hz, 2H), 7.29 – 7.11 (m, 5H), 6.25 (ddd, *J* = 10.4, 5.5, 2.0 Hz, 1H), 6.14 (dd, *J* = 10.3, 1.5 Hz, 1H), 4.55 (d, *J* = 2.1 Hz, 1H), 4.28 (dd, *J* = 11.3, 7.7 Hz, 1H), 4.18 (dd, *J* = 11.6, 4.5 Hz, 1H), 3.96 – 3.92 (m, 1H), 3.82 (ddd, *J* = 7.2, 4.5, 2.0 Hz, 1H), 3.46 (d, *J* = 9.2 Hz, 1H), 3.40 (d, *J* = 13.5 Hz, 1H), 3.33 (d, *J* = 13.5 Hz, 1H), 2.38 (s, 3H), 1.08 (s, 9H);

**<sup>13</sup>C NMR (100 MHz, acetone-*d*<sub>6</sub>)**  $\delta$  177.3, 176.5, 160.6, 143.4, 134.5, 130.6, 130.3, 129.4, 128.0, 127.7, 127.0, 123.0, 77.1, 76.7, 76.0, 63.6, 61.6, 38.5, 38.3, 26.4, 20.7;

**HRMS (ESI) *m/z***: [M+Na] calcd. for C<sub>28</sub>H<sub>31</sub>NO<sub>6</sub>Na, 500.2049; found, 500.2053.

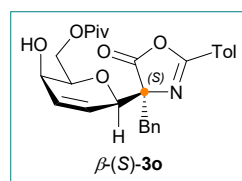

Compound  $\beta$ -(S)-**3o** was obtained as colorless syrup in 63% yield.

**<sup>1</sup>H NMR (400 MHz, acetone-*d*<sub>6</sub>)**  $\delta$  7.72 (d, *J* = 8.0 Hz, 2H), 7.30 (d, *J* = 7.9 Hz, 2H), 7.21 – 7.12 (m, 5H), 6.27 (ddd, *J* = 10.4, 5.6, 1.9 Hz, 1H), 6.18 (dd, *J* = 10.3, 1.5 Hz, 1H), 4.65 (d, *J* = 2.1 Hz, 1H), 4.21 (dd, *J* = 11.5, 7.5 Hz, 1H), 4.14 (dd, *J* = 11.5, 4.7 Hz, 1H), 3.91 (ddd, *J* = 9.5, 5.3, 2.2 Hz, 1H), 3.85 (ddd, *J* = 7.1, 4.7, 1.8 Hz, 1H), 3.41 (d, *J* = 13.3 Hz, 1H), 3.28 (d, *J* = 13.3 Hz, 1H), 3.10 (d, *J* = 9.6 Hz, 1H), 2.38 (s, 3H), 1.19 (s, 9H);

**<sup>13</sup>C NMR (100 MHz, acetone-*d*<sub>6</sub>)**  $\delta$  178.1, 177.8, 161.9, 144.4, 135.1, 131.3, 131.2, 130.3, 128.8, 128.5, 127.9, 127.9, 123.8, 77.9, 77.8, 76.6, 64.3, 62.4, 39.4, 39.2, 27.4, 21.5;

**HRMS (ESI) *m/z***: [M+Na] calcd. for C<sub>28</sub>H<sub>31</sub>NO<sub>6</sub>Na, 500.2049; found, 500.2050.

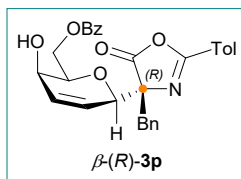

Compound  $\beta$ -(R)-3p was obtained as colorless syrup in 40% yield.

**$^1\text{H}$  NMR (400 MHz, acetone- $d_6$ )**  $\delta$  7.91 (d,  $J$  = 7.5 Hz, 2H), 7.71 (d,  $J$  = 8.0 Hz, 2H), 7.63 – 7.59 (m, 1H), 7.45 (t,  $J$  = 7.7 Hz, 2H), 7.26 (d,  $J$  = 8.0 Hz, 2H), 7.21 – 7.10 (m, 5H), 6.28 (ddd,  $J$  = 10.5, 5.5, 2.0 Hz, 1H), 6.19 (dd,  $J$  = 10.4, 1.4 Hz, 1H), 4.59 (d,  $J$  = 2.0 Hz, 1H), 4.55 – 4.47 (m, 2H), 4.06 (ddd,  $J$  = 9.4, 5.1, 2.4 Hz, 1H), 3.99 (ddd,  $J$  = 7.3, 4.9, 2.1 Hz, 1H), 3.57 (d,  $J$  = 9.0 Hz, 1H), 3.37 (t,  $J$  = 13.9 Hz, 2H), 2.38 (s, 3H);

**$^{13}\text{C}$  NMR (100 MHz, acetone- $d_6$ )**  $\delta$  177.3, 166.5, 161.5, 144.2, 135.3, 133.7, 131.4, 131.2, 131.1, 130.2, 130.1, 129.2, 128.8, 128.4, 127.9, 127.8, 123.8, 77.8, 77.4, 76.8, 65.0, 62.4, 39.2, 21.5;

**HRMS (ESI)  $m/z$ :** [M+H] calcd. for  $\text{C}_{30}\text{H}_{28}\text{NO}_6$ , 498.1917; found, 498.1921.

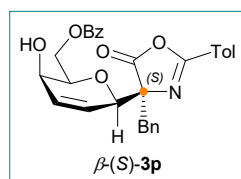

Compound  $\beta$ -(S)-3p was obtained as colorless syrup in 56% yield.

**$^1\text{H}$  NMR (400 MHz, acetone- $d_6$ )**  $\delta$  8.06 (d,  $J$  = 8.3 Hz, 2H), 7.74 (d,  $J$  = 8.0 Hz, 2H), 7.65 (t,  $J$  = 7.4 Hz, 1H), 7.52 (t,  $J$  = 7.7 Hz, 2H), 7.30 (d,  $J$  = 7.9 Hz, 2H), 7.22 – 7.12 (m, 5H), 6.30 (ddd,  $J$  = 10.5, 5.5, 1.9 Hz, 1H), 6.18 (dd,  $J$  = 10.3, 1.6 Hz, 1H), 4.68 (d,  $J$  = 2.0 Hz, 1H), 4.49 (dd,  $J$  = 11.6, 4.6 Hz, 1H), 4.42 (dd,  $J$  = 11.5, 7.4 Hz, 1H), 4.04 – 4.01 (m, 2H), 3.44 (d,  $J$  = 13.3 Hz, 1H), 3.27 (d,  $J$  = 13.4 Hz, 1H), 3.22 (d,  $J$  = 9.6 Hz, 1H), 2.38 (s, 3H);

**$^{13}\text{C}$  NMR (100 MHz, acetone- $d_6$ )**  $\delta$  177.9, 166.6, 162.0, 144.4, 135.1, 133.9, 131.3, 131.3, 131.1, 130.3, 130.2, 129.3, 128.7, 128.5, 127.9, 127.9, 123.8, 77.9, 77.6, 76.6, 65.1, 62.5, 39.5, 21.5;

**HRMS (ESI)  $m/z$ :** [M+H] calcd. for  $\text{C}_{30}\text{H}_{28}\text{NO}_6$ , 498.1917; found, 498.1919.



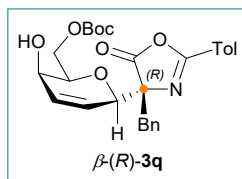

Compound  $\beta$ -(R)-3q was obtained as colorless syrup in 41% yield.

**<sup>1</sup>H NMR (400 MHz, acetone-*d*<sub>6</sub>)**  $\delta$  7.73 (d, *J* = 7.9 Hz, 2H), 7.31 (d, *J* = 7.9 Hz, 2H), 7.22 – 7.11 (m, 5H), 6.25 (ddd, *J* = 10.5, 5.6, 2.0 Hz, 1H), 6.10 (dd, *J* = 10.3, 1.5 Hz, 1H), 4.58 (d, *J* = 2.2 Hz 1H), 4.28 (dd, *J* = 11.5, 7.5 Hz, 1H), 4.20 (dd, *J* = 11.5, 4.2 Hz, 1H), 3.94 (ddd, *J* = 8.8, 5.5, 2.5 Hz, 1H), 3.82 (ddd, *J* = 7.0, 4.1, 1.9 Hz, 1H), 3.46 (d, *J* = 9.2 Hz, 1H), 3.40 (d, *J* = 13.5 Hz, 1H), 3.33 (d, *J* = 13.5 Hz, 1H), 2.38 (s, 3H), 1.38 (s, 9H);

**<sup>13</sup>C NMR (100 MHz, acetone-*d*<sub>6</sub>)**  $\delta$  177.4, 161.4, 154.2, 144.3, 135.3, 131.4, 131.2, 130.3, 128.8, 128.5, 127.9, 127.8, 123.8, 81.9, 77.7, 77.5, 76.7, 67.3, 62.4, 39.4, 27.8, 21.5;

**HRMS (ESI) *m/z***: [M+H] calcd. for C<sub>28</sub>H<sub>32</sub>NO<sub>7</sub>, 494.2179; found, 494.2182.

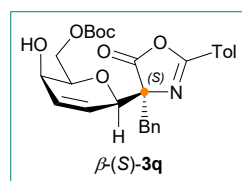

Compound  $\beta$ -(S)-3q was obtained as colorless syrup in 53% yield.

**<sup>1</sup>H NMR (400 MHz, acetone-*d*<sub>6</sub>)**  $\delta$  7.74 (d, *J* = 7.9 Hz, 2H), 7.31 (d, *J* = 7.9 Hz, 2H), 7.25 – 7.10 (m, 5H), 6.27 (ddd, *J* = 9.9, 5.5, 1.6 Hz, 1H), 6.13 (dd, *J* = 10.3, 1.2 Hz, 1H), 4.64 (d, *J* = 2.1 Hz, 1H), 4.21 (dd, *J* = 11.6, 7.4 Hz, 1H), 4.15 (dd, *J* = 11.5, 4.3 Hz, 1H), 3.92 – 3.88 (m, 1H), 3.85 – 3.81 (m, 1H), 3.41 (d, *J* = 13.3 Hz, 1H), 3.28 (d, *J* = 13.3 Hz, 1H), 3.03 (d, *J* = 9.8 Hz, 1H), 2.39 (s, 3H), 1.45 (s, 9H);

**<sup>13</sup>C NMR (100 MHz, acetone-*d*<sub>6</sub>)**  $\delta$  177.9, 162.1, 154.2, 144.4, 135.1, 131.3, 131.3, 130.3, 128.8, 128.5, 127.9, 127.8, 123.8, 82.0, 77.9, 77.4, 76.5, 67.2, 62.4, 39.5, 27.8, 21.5;

**HRMS (ESI) *m/z***: [M+H] calcd. for C<sub>28</sub>H<sub>32</sub>NO<sub>7</sub>, 494.2179; found, 494.2182.

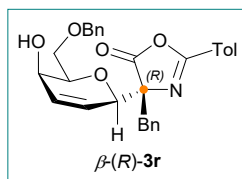

Compound  $\beta$ -(R)-**3r** was obtained as colorless syrup in 31% yield.

**$^1\text{H}$  NMR (400 MHz, acetone- $d_6$ )**  $\delta$  7.77 – 7.74 (m, 2H), 7.30 (d,  $J$  = 8.0 Hz, 2H), 7.27 – 7.11 (m, 10H), 6.25 (ddd,  $J$  = 10.3, 5.6, 2.1 Hz, 1H), 6.16 (dd,  $J$  = 10.4, 1.6 Hz, 1H), 4.58 (q,  $J$  = 1.9 Hz, 1H), 4.53 (d,  $J$  = 12.4 Hz, 1H), 4.46 (d,  $J$  = 12.3 Hz, 1H), 3.91 (d,  $J$  = 6.6 Hz, 1H), 3.79 (ddd,  $J$  = 6.7, 4.5, 2.1 Hz, 1H), 3.74 (dd,  $J$  = 10.6, 4.5 Hz, 1H), 3.60 (dd,  $J$  = 10.6, 6.9 Hz, 1H), 3.39 (q,  $J$  = 13.4 Hz, 1H), 3.35 (q,  $J$  = 13.5 Hz, 1H), 3.16 (d,  $J$  = 9.1 Hz, 1H), 2.39 (s, 3H);

**$^{13}\text{C}$  NMR (100 MHz, acetone- $d_6$ )**  $\delta$  177.5, 161.3, 144.3, 139.9, 135.4, 131.7, 131.2, 130.3, 128.9, 128.8, 128.5, 128.0, 127.9, 127.8, 127.7, 123.9, 78.7, 77.9, 77.6, 73.7, 70.9, 62.7, 39.3, 21.5;

**HRMS (ESI)  $m/z$ :** [M+H] calcd. for  $\text{C}_{30}\text{H}_{30}\text{NO}_5$ , 484.2124; found, 484.2127.

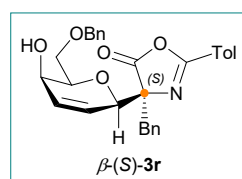

Compound  $\beta$ -(S)-**3r** was obtained as colorless syrup in 58% yield.

**$^1\text{H}$  NMR (400 MHz, acetone- $d_6$ )**  $\delta$  7.73 (d,  $J$  = 8.3 Hz, 2H), 7.37 – 7.12 (m, 12H), 6.27 (ddd,  $J$  = 10.3, 5.8, 2.0 Hz, 1H), 6.14 (dd,  $J$  = 10.3, 1.7 Hz, 1H), 4.67 (q,  $J$  = 1.9 Hz, 1H), 4.55 (s, 2H), 3.88 (ddt,  $J$  = 9.6, 5.8, 1.9 Hz, 1H), 3.82 (ddd,  $J$  = 6.8, 4.8, 1.9 Hz, 1H), 3.66 (dd,  $J$  = 10.4, 4.9 Hz, 1H), 3.56 (dd,  $J$  = 10.4, 6.8 Hz, 1H), 3.42 (d,  $J$  = 13.3 Hz, 1H), 3.28 (d,  $J$  = 13.3 Hz, 1H), 2.82 (d,  $J$  = 9.8 Hz, 1H), 2.38 (s, 3H);

**$^{13}\text{C}$  NMR (100 MHz, acetone- $d_6$ )**  $\delta$  178.1, 161.9, 144.4, 139.8, 135.2, 131.7, 131.2, 130.3, 129.0, 128.8, 128.5, 128.2, 128.0, 127.9, 127.7, 123.8, 78.1, 78.0, 77.7, 73.5, 70.6, 62.6, 39.5, 21.5;

**HRMS (ESI)  $m/z$ :** [M+H] calcd. for  $\text{C}_{30}\text{H}_{30}\text{NO}_5$ , 484.2124; found, 484.2127.

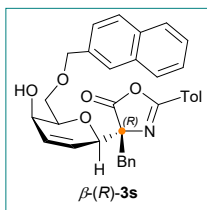

Compound  $\beta$ -(R)-**3s** was obtained as colorless syrup in 32% yield.

**$^1\text{H}$  NMR (400 MHz, acetone- $d_6$ )**  $\delta$  7.86 – 7.81 (m, 2H), 7.77 – 7.74 (m, 3H), 7.70 (s, 1H), 7.50 – 7.44 (m, 2H), 7.33 (dd,  $J$  = 8.5, 1.7 Hz, 1H), 7.28 (d,  $J$  = 8.0 Hz, 2H), 7.23 – 7.11 (m, 5H), 6.26 (ddd,  $J$  = 10.3, 5.6, 2.1 Hz, 1H), 6.18 (dd,  $J$  = 10.3, 1.6 Hz, 1H), 4.71 (dd,  $J$  = 12.6, 0.9 Hz, 1H), 4.63 (dd,  $J$  = 12.6, 0.9 Hz, 1H), 4.59 (q,  $J$  = 1.9 Hz, 1H), 3.94 (ddt,  $J$  = 9.2, 5.5, 1.9 Hz, 1H), 3.85 – 3.79 (m, 2H), 3.70 – 3.64 (m, 1H), 3.38 (s, 2H), 3.19 (d,  $J$  = 9.1 Hz, 1H), 2.36 (s, 3H);

**$^{13}\text{C}$  NMR (100 MHz, acetone- $d_6$ )**  $\delta$  177.5, 161.3, 144.3, 137.6, 135.4, 134.2, 133.7, 131.7, 131.2, 130.3, 128.8, 128.6, 128.5, 128.5, 128.4, 127.8, 127.7, 126.7, 126.4, 126.4, 126.4, 123.9, 78.8, 77.9, 77.6, 73.9, 71.0, 62.7, 39.3, 21.5;

**HRMS (ESI)  $m/z$ :** [M+H] calcd. for  $\text{C}_{34}\text{H}_{32}\text{NO}_5$ , 534.2280; found, 534.2286.

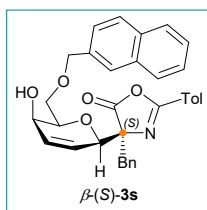

Compound  $\beta$ -(S)-**3s** was obtained as colorless syrup in 60% yield.

**$^1\text{H}$  NMR (400 MHz, acetone- $d_6$ )**  $\delta$  7.89 – 7.84 (m, 4H), 7.70 (d,  $J$  = 8.3 Hz, 2H), 7.52 – 7.45 (m, 3H), 7.27 – 7.11 (m, 7H), 6.27 (ddd,  $J$  = 10.3, 5.7, 2.0 Hz, 1H), 6.15 (dd,  $J$  = 10.3, 1.6 Hz, 1H), 4.75 – 4.71 (m, 2H), 4.69 (q,  $J$  = 1.8 Hz, 1H), 3.92 – 3.84 (m, 2H), 3.70 (dd,  $J$  = 10.5, 4.6 Hz, 1H), 3.60 (dd,  $J$  = 10.5, 6.8 Hz, 1H), 3.42 (d,  $J$  = 13.3 Hz, 1H), 3.29 (d,  $J$  = 13.3 Hz, 1H), 2.84 (d,  $J$  = 9.8 Hz, 1H), 2.35 (s, 3H);

**$^{13}\text{C}$  NMR (100 MHz, acetone- $d_6$ )**  $\delta$  178.1, 161.9, 144.4, 137.4, 135.2, 134.2, 133.8, 131.7, 131.2, 130.3, 128.8, 128.7, 128.6, 128.5, 128.4, 127.9, 127.7, 126.8, 126.7, 126.5, 126.5, 123.8, 78.1, 78.0, 77.8, 73.5, 70.7, 62.7, 39.5, 21.5;

**HRMS (ESI)  $m/z$ :** [M+H] calcd. for  $\text{C}_{34}\text{H}_{32}\text{NO}_5$ , 534.2280; found, 534.2281.

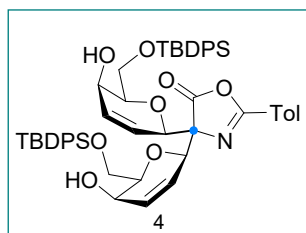

Compound **4** was obtained as colorless syrup in 83% yield.

**<sup>1</sup>H NMR (400 MHz, CDCl<sub>3</sub>)** δ 7.79 (d, *J* = 8.0 Hz, 2H), 7.69 – 7.62 (m, 8H), 7.41 – 7.31 (m, 12H), 7.18 (d, *J* = 8.0 Hz, 2H), 6.32 – 6.28 (m, 1H), 6.27 – 6.22 (m, 1H), 5.92 (d, *J* = 10.2 Hz, 1H), 5.61 (dd, *J* = 10.1, 1.9 Hz, 1H), 4.89 (d, *J* = 8.1 Hz, 2H), 3.98 (d, *J* = 6.2 Hz, 1H), 3.93 – 3.68 (m, 7H), 2.82 (brs, 1H), 2.36 (brs, 1H and s, 3H), 1.00 (s, 18H);

**<sup>13</sup>C NMR (100 MHz, CDCl<sub>3</sub>)** δ 175.7, 163.7, 144.2, 135.6, 135.6, 135.6, 133.5, 133.4, 132.7, 131.4, 129.7, 129.6, 129.6, 128.3, 127.7, 127.6, 127.4, 125.9, 121.9, 78.6, 77.8, 77.6, 74.6, 63.0, 62.8, 61.6, 61.3, 26.7, 26.7, 21.7, 19.2, 19.2;

**HRMS (ESI) *m/z***: [M+H] calcd. for C<sub>54</sub>H<sub>62</sub>NO<sub>8</sub>Si<sub>2</sub>, 908.4014; found, 908.4008.

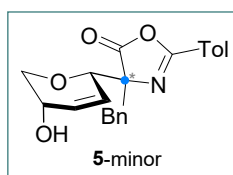

Compound **5-minor** ( $\text{CH}_2\text{Cl}_2/\text{MeOH}$ , 30:1,  $R_f = 0.6$ ) was obtained as colorless syrup in 39% yield.

**$^1\text{H}$  NMR (400 MHz, acetone- $d_6$ )**  $\delta$  7.74 (d,  $J = 8.2$  Hz, 2H), 7.31 (d,  $J = 8.0$  Hz, 2H), 7.17 – 7.12 (m, 5H), 6.21 – 6.14 (m, 2H), 4.55 (d,  $J = 1.9$  Hz, 1H), 3.91 (ddd,  $J = 7.9, 3.6, 2.3$  Hz, 1H), 3.77 (dd,  $J = 11.5, 3.2$  Hz, 1H), 3.71 (dd,  $J = 11.4, 3.3$  Hz, 1H), 3.51 (d,  $J = 8.0$  Hz, 1H), 3.39 (d,  $J = 13.3$  Hz, 1H), 3.26 (d,  $J = 13.3$  Hz, 1H), 2.39 (s, 3H);

**$^{13}\text{C}$  NMR (100 MHz, acetone- $d_6$ )**  $\delta$  178.2, 161.6, 144.3, 135.2, 132.1, 131.1, 130.3, 128.8, 128.5, 127.9, 126.6, 123.9, 78.7, 76.8, 70.4, 62.2, 39.5, 21.5;

**HRMS (ESI)  $m/z$ :**  $[\text{M}+\text{H}]$  calcd. for  $\text{C}_{22}\text{H}_{22}\text{NO}_4$ , 364.1549; found, 364.1541.

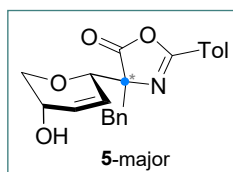

Compound **5-major** ( $\text{CH}_2\text{Cl}_2/\text{MeOH}$ , 30:1,  $R_f = 0.55$ ) was obtained as colorless syrup in 44% yield.

**$^1\text{H}$  NMR (400 MHz, acetone- $d_6$ )**  $\delta$  7.74 (d,  $J = 8.3$  Hz, 2H), 7.31 (d,  $J = 8.0$  Hz, 2H), 7.21 – 7.12 (m, 5H), 6.16 (ddd,  $J = 10.6, 4.2, 2.2$  Hz, 1H), 6.01 (dd,  $J = 10.4, 1.8$  Hz, 1H), 4.44 (d,  $J = 2.0$  Hz, 1H), 3.96 – 3.91 (m, 2H), 3.77 – 3.71 (m, 2H), 3.42 (d,  $J = 13.5$  Hz, 1H), 3.31 (d,  $J = 13.5$  Hz, 1H), 2.39 (s, 3H);

**$^{13}\text{C}$  NMR (100 MHz, acetone- $d_6$ )**  $\delta$  177.6, 161.0, 144.3, 135.5, 132.3, 131.1, 130.3, 128.8, 128.4, 127.8, 126.7, 123.8, 77.8, 76.9, 70.7, 62.3, 39.7, 21.5;

**HRMS (ESI)  $m/z$ :**  $[\text{M}+\text{H}]$  calcd. for  $\text{C}_{22}\text{H}_{22}\text{NO}_4$ , 364.1549; found, 364.1542.

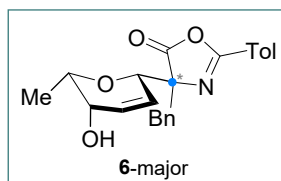

Compound **6-major** (CH<sub>2</sub>Cl<sub>2</sub>/MeOH, 30:1, R<sub>f</sub> = 0.7) was obtained as colorless syrup in 63% yield.

**<sup>1</sup>H NMR (400 MHz, acetone-*d*<sub>6</sub>)** δ 7.73 (d, *J* = 8.3 Hz, 2H), 7.30 (d, *J* = 8.0 Hz, 2H), 7.20 – 7.11 (m, 5H), 6.28 (ddd, *J* = 10.3, 5.8, 2.0 Hz, 1H), 6.12 (dd, *J* = 10.3, 1.8 Hz, 1H), 4.62 (d, *J* = 1.9 Hz, 1H), 3.72 (qd, *J* = 6.4, 1.8 Hz, 1H), 3.62 (ddt, *J* = 10.2, 5.7, 1.8 Hz, 1H), 3.38 (d, *J* = 13.4 Hz, 1H), 3.28 (d, *J* = 13.3 Hz, 1H), 2.61 (d, *J* = 10.3 Hz, 1H), 2.38 (s, 3H), 1.14 (d, *J* = 6.4 Hz, 3H);

**<sup>13</sup>C NMR (100 MHz, acetone-*d*<sub>6</sub>)** δ 178.1, 161.8, 144.4, 135.2, 132.3, 131.2, 130.3, 128.7, 128.4, 127.9, 127.3, 123.8, 78.2, 77.9, 74.2, 64.6, 39.4, 21.5, 17.0;

**HRMS (ESI) *m/z***: [M+H] calcd. for C<sub>23</sub>H<sub>24</sub>NO<sub>4</sub>, 378.1705; found, 378.1698.

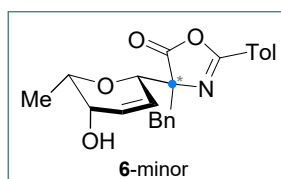

Compound **6-minor** (CH<sub>2</sub>Cl<sub>2</sub>/MeOH, 30:1, R<sub>f</sub> = 0.6) was obtained as colorless syrup in 29% yield.

**<sup>1</sup>H NMR (400 MHz, acetone-*d*<sub>6</sub>)** δ 7.74 (d, *J* = 8.2 Hz, 2H), 7.31 (d, *J* = 8.0 Hz, 2H), 7.21 – 7.10 (m, 5H), 6.25 (ddd, *J* = 10.2, 5.6, 2.2 Hz, 1H), 6.08 (dd, *J* = 10.3, 1.7 Hz, 1H), 4.53 (d, *J* = 2.0 Hz, 1H), 3.71 – 3.64 (m, 2H), 3.39 (d, *J* = 13.5 Hz, 1H), 3.32 (d, *J* = 13.5 Hz, 1H), 2.96 (d, *J* = 9.7 Hz, 1H), 2.39 (s, 3H), 1.18 (d, *J* = 6.4 Hz, 3H);

**<sup>13</sup>C NMR (100 MHz, acetone-*d*<sub>6</sub>)** δ 177.6, 161.3, 144.3, 135.5, 132.4, 131.1, 130.3, 128.8, 128.4, 127.8, 127.4, 123.9, 78.0, 77.7, 74.5, 64.7, 39.4, 21.5, 17.0;

**HRMS (ESI) *m/z***: [M+H] calcd. for C<sub>23</sub>H<sub>24</sub>NO<sub>4</sub>, 378.1705; found, 378.1699.

## 5. Synthetic transformations of $\beta$ -C-glycoside **3a**

Under argon atmosphere, an oven-dried resealable Schlenk tube equipped with a magnetic stir bar was charged with  $\beta$ -(*R*)-**3a** or  $\beta$ -(*S*)-**3a** (63 mg, 0.1 mmol) and anhydrous MeOH (1 mL). Then, MeONa (27  $\mu$ L, 0.15 mmol, 30% in MeOH) was added and the reaction mixture was stirred at room temperature for 20 min. Upon completion (monitored by TLC), the mixture was diluted with H<sub>2</sub>O (15 mL) and extracted with EtOAc (10 mL  $\times$  2). The combined organic layer was washed with brine and dried over Na<sub>2</sub>SO<sub>4</sub>, then concentrated under reduced pressure. The residue was purified by silica column chromatography to give  $\beta$ -(*R*)-**7a** or  $\beta$ -(*S*)-**7a** respectively.

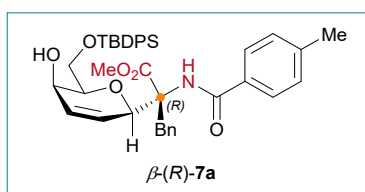

Compound  $\beta$ -(*R*)-**7a** was obtained as a colorless syrup in 85% yield.

**<sup>1</sup>H NMR (400 MHz, acetone-*d*<sub>6</sub>)**  $\delta$  7.79 – 7.77 (m, 4H), 7.66 (d, *J* = 8.3 Hz, 2H), 7.51 (s, 1H), 7.48 – 7.40 (m, 6H), 7.30 – 7.27 (m, 2H), 7.22 – 7.16 (m, 5H), 6.35 (dd, *J* = 10.5, 1.5 Hz, 1H), 6.02 (ddd, *J* = 10.4, 5.6, 2.2 Hz, 1H), 4.73 (d, *J* = 1.9 Hz, 1H), 3.98 – 3.97 (m, 2H), 3.92 (ddt, *J* = 7.7, 5.7, 1.9 Hz, 1H), 3.82 – 3.74 (m, 5H), 3.50 (d, *J* = 13.0 Hz, 1H), 3.14 (d, *J* = 7.8 Hz, 1H), 2.32 (s, 3H), 1.04 (s, 9H);

**<sup>13</sup>C NMR (100 MHz, acetone-*d*<sub>6</sub>)**  $\delta$  171.2, 167.3, 142.2, 136.6, 136.3, 134.3, 134.2, 133.0, 131.2, 130.7, 130.5, 130.5, 129.6, 129.2, 128.9, 128.6, 128.0, 127.6, 79.7, 76.3, 67.1, 65.2, 62.6, 52.2, 39.0, 27.2, 21.3, 19.6;

**HRMS (ESI)** *m/z*: [M+H] calcd. for C<sub>40</sub>H<sub>46</sub>NO<sub>6</sub>Si, 664.3094; found, 664.3093.

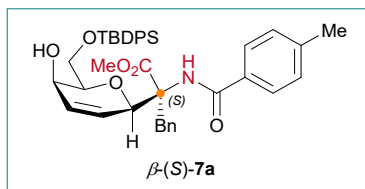

Compound  $\beta$ -(*S*)-**7a** was obtained as a colorless syrup in 79% yield.

**<sup>1</sup>H NMR (400 MHz, acetone-*d*<sub>6</sub>)**  $\delta$  7.89 – 7.84 (m, 4H), 7.71 (d, *J* = 7.9 Hz, 2H), 7.52 – 7.48 (m, 6H), 7.41 (s, 1H), 7.29 – 7.23 (m, 4H), 7.18 – 7.14 (m, 3H), 6.24 (d, *J* = 10.4 Hz, 1H), 6.04

(ddd,  $J = 10.3, 5.5, 2.1$  Hz, 1H), 4.58 (d,  $J = 2.2$  Hz, 1H), 4.11 – 3.92 (m, 4H), 3.84 – 3.81 (m, 1H), 3.72 (s, 3H), 3.67 (d,  $J = 13.6$  Hz, 1H), 3.20 (d,  $J = 8.1$  Hz, 1H), 2.37 (s, 3H), 1.12 (s, 9H);  $^{13}\text{C}$  NMR (100 MHz, acetone- $d_6$ )  $\delta$  171.4, 167.3, 142.5, 137.7, 136.3, 136.3, 134.3, 134.2, 132.9, 131.6, 130.6, 130.5, 130.1, 129.7, 128.8, 128.7, 128.0, 127.2, 80.4, 76.0, 66.8, 65.4, 62.7, 52.4, 35.9, 27.2, 21.3, 19.7;

HRMS (ESI)  $m/z$ : [M+H] calcd. for  $\text{C}_{40}\text{H}_{46}\text{NO}_6\text{Si}$ , 664.3094; found, 664.3091.

To a solution of  $\beta$ -(*R*)-**7a** (63 mg) or  $\beta$ -(*S*)-**7a** (48 mg) in THF was added TBAF (1.2 eq., 0.5 M in THF) at room temperature, then the reaction mixture was stirred for 15 min. Upon completion (monitored by TLC), the mixture was concentrated under reduced pressure to give a crude product which was purified *via* preparative TLC to yield  $\beta$ -(*R*)-**8a** or  $\beta$ -(*S*)-**8a** respectively.

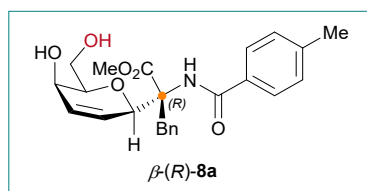

Compound  $\beta$ -(*R*)-**8a** was obtained as a colorless syrup in 82% yield.

$^1\text{H}$  NMR (400 MHz,  $\text{CDCl}_3$ )  $\delta$  7.59 (d,  $J = 8.2$  Hz, 2H), 7.22 – 7.19 (m, 5H), 7.13 (s, 1H), 7.10 – 7.08 (m, 2H), 6.20 (dd,  $J = 10.4, 1.4$  Hz, 1H), 6.14 (ddd,  $J = 10.3, 5.5, 2.0$  Hz, 1H), 4.98 (d,  $J = 1.9$  Hz, 1H), 3.90 (t,  $J = 7.1$  Hz, 1H), 3.82 – 3.70 (m, 6H), 3.57 – 3.52 (m, 2H), 2.64 (s, 1H), 2.37 (s, 3H), 2.36 (s, 1H);

$^{13}\text{C}$  NMR (100 MHz,  $\text{CDCl}_3$ )  $\delta$  171.3, 167.6, 142.2, 135.5, 132.0, 130.1, 129.3, 129.3, 128.4, 128.3, 127.1, 127.0, 77.2, 75.8, 68.2, 62.9, 62.8, 52.6, 36.9, 21.5;

HRMS (ESI)  $m/z$ : [M+H] calcd. for  $\text{C}_{24}\text{H}_{28}\text{NO}_6$ , 426.1917; found, 426.1913.

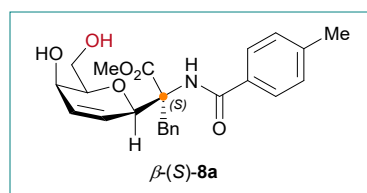

Compound  $\beta$ -(*S*)-**8a** was obtained as a colorless syrup in 84% yield.

$^1\text{H}$  NMR (400 MHz,  $\text{CDCl}_3$ )  $\delta$  7.57 (d,  $J = 8.1$  Hz, 2H), 7.26 – 7.18 (m, 5H), 7.12 – 7.09 (m,



2H), 7.01 (s, 1H), 6.15 (ddd,  $J = 10.3, 5.7, 2.1$  Hz, 1H), 6.05 (dd,  $J = 10.2, 1.5$  Hz, 1H), 5.15 (d,  $J = 1.8$  Hz, 1H), 4.08 (d,  $J = 13.8$  Hz, 1H), 3.93 (dd,  $J = 11.3, 6.4$  Hz, 2H), 3.83 – 3.82 (m, 4H), 3.71 (ddd,  $J = 6.7, 4.7, 1.6$  Hz, 1H), 3.57 (d,  $J = 13.8$  Hz, 1H), 2.39 (s, 3H), 2.16 (s, 1H), 1.99 (d,  $J = 9.7$  Hz, 1H);

$^{13}\text{C}$  NMR (100 MHz,  $\text{CDCl}_3$ )  $\delta$  171.8, 167.1, 142.4, 135.9, 131.9, 130.0, 129.4, 129.1, 129.0, 128.3, 127.0, 126.9, 77.6, 76.1, 68.3, 62.8, 53.1, 35.4, 21.5;

HRMS (ESI)  $m/z$ :  $[M+H]$  calcd. for  $\text{C}_{24}\text{H}_{28}\text{NO}_6$ , 426.1917; found, 426.1913.

To a solution of  $\beta$ -(*R*)-**3a** (63 mg, 0.1 mmol) or  $\beta$ -(*S*)-**3a** (63 mg, 0.1 mmol) in acetone/ $\text{H}_2\text{O}$  (1 mL/0.2 mL, 5:1) was added  $\text{K}_2\text{OsO}_4 \cdot 2\text{H}_2\text{O}$  (1.8 mg, 5 mol%) and NMO (35 mg, 0.3 mmol) at room temperature, then the reaction mixture was stirred for 24 hours. Upon completion (monitored by TLC), the mixture was extracted with EtOAc (5 mL  $\times$  2), the combined organic layer was washed with brine and dried over  $\text{Na}_2\text{SO}_4$ . Removal of the solvent under reduced pressure followed by purification *via* preparative TLC to afford  $\beta$ -(*R*)-**9a** or  $\beta$ -(*S*)-**9a** respectively.

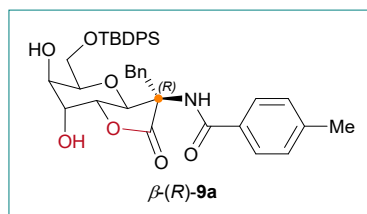

Compound  $\beta$ -(*R*)-**9a** was obtained as a colorless syrup in 92% yield.

$^1\text{H}$  NMR (400 MHz,  $\text{CDCl}_3$ )  $\delta$  7.62 – 7.56 (m, 4H), 7.49 (d,  $J = 8.0$  Hz, 2H), 7.45 – 7.34 (m, 4H), 7.29 – 7.22 (m, 7H), 7.07 (d,  $J = 7.9$  Hz, 2H), 6.30 (s, 1H), 4.73 (dd,  $J = 9.8, 2.4$  Hz, 1H), 4.47 (s, 1H), 4.31 – 4.28 (m, 2H), 4.10 (d,  $J = 3.7$  Hz, 1H), 3.95 – 3.86 (m, 3H), 3.50 (d,  $J = 13.9$  Hz, 1H), 3.30 (d,  $J = 13.9$  Hz, 1H), 3.16 (brs, 1H), 2.31 (s, 3H), 0.94 (s, 9H);

$^{13}\text{C}$  NMR (100 MHz,  $\text{CDCl}_3$ )  $\delta$  171.9, 166.7, 142.5, 135.5, 135.4, 134.3, 132.5, 132.0, 130.5, 130.3, 130.1, 130.0, 129.3, 128.6, 127.9, 127.9, 127.6, 127.1, 76.6, 75.9, 75.7, 72.6, 66.7, 65.4, 60.0, 41.3, 26.6, 21.5, 19.1;

HRMS (ESI)  $m/z$ :  $[M+H]$  calcd. for  $\text{C}_{39}\text{H}_{44}\text{NO}_7\text{Si}$ , 666.2887; found, 666.2887.

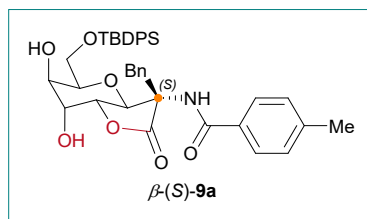

Compound  $\beta$ -(S)-**9a** was obtained as a white acicular crystal in 90% yield, m. p. 142-143 °C.

**$^1\text{H}$  NMR (400 MHz,  $\text{CDCl}_3$ )**  $\delta$  7.78 – 7.76 (m, 2H), 7.71 – 7.68 (m, 2H), 7.47 – 7.32 (m, 13H), 7.14 – 7.12 (m, 2H), 6.34 (s, 1H), 5.28 (d,  $J = 10.3$  Hz, 1H), 4.59 (dd,  $J = 10.3, 2.5$  Hz, 1H), 4.51 – 4.49 (m, 1H), 4.23 (d,  $J = 3.6$  Hz, 1H), 4.13 (dd,  $J = 11.2, 4.0$  Hz, 1H), 4.06 – 3.98 (m, 2H), 3.83 (s, 1H), 3.52 (d,  $J = 14.1$  Hz, 1H), 3.30 (d,  $J = 14.1$  Hz, 1H), 2.33 (s, 3H), 2.04 (s, 1H), 1.08 (s, 9H);

**$^{13}\text{C}$  NMR (100 MHz,  $\text{CDCl}_3$ )**  $\delta$  172.7, 166.8, 142.5, 135.7, 135.5, 133.1, 132.3, 132.2, 130.9, 130.3, 130.0, 130.0, 129.2, 128.9, 128.0, 127.9, 127.9, 126.9, 75.7, 74.2, 72.8, 67.3, 65.6, 62.0, 34.2, 26.7, 21.4, 19.1;

**HRMS (ESI)**  $m/z$ :  $[\text{M}+\text{H}]$  calcd. for  $\text{C}_{39}\text{H}_{44}\text{NO}_7\text{Si}$ , 666.2887; found, 666.2884.

## 6. Crystal data and structure refinement for $\beta$ -(S)-9a

**Compound  $\beta$ -(S)-9a:** The crystal structure of compound  $\beta$ -(S)-9a has been deposited at the Cambridge Crystallographic Data Centre (CCDC 2201062). The data is available free of charge at [www.ccdc.cam.ac.uk/conts/retrieving.html](http://www.ccdc.cam.ac.uk/conts/retrieving.html).

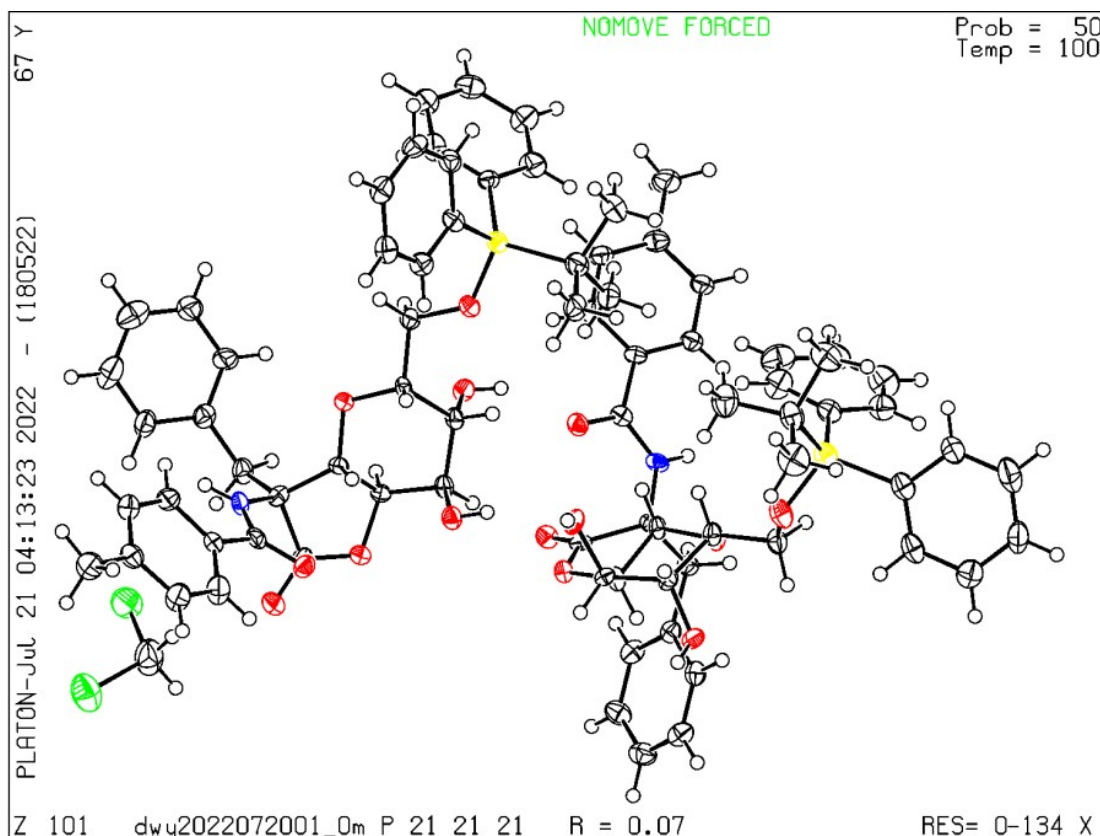

**Table 1. Crystal data and structure refinement for  $\beta$ -(S)-9a.**

|                     |                                                        |
|---------------------|--------------------------------------------------------|
| Identification code | $\beta$ -(S)-9a                                        |
| Empirical formula   | C <sub>39.5</sub> H <sub>44</sub> ClNO <sub>7</sub> Si |
| Formula weight      | 708.29                                                 |
| Temperature/K       | 100(2)                                                 |
| Crystal system      | orthorhombic                                           |
| Space group         | P2 <sub>1</sub> 2 <sub>1</sub> 2 <sub>1</sub>          |
| a/Å                 | 13.5432(8)                                             |
| b/Å                 | 15.8899(17)                                            |
| c/Å                 | 34.626(3)                                              |
| $\alpha$ /°         | 90                                                     |
| $\beta$ /°          | 90                                                     |
| $\gamma$ /°         | 90                                                     |

|                                             |                                                                |
|---------------------------------------------|----------------------------------------------------------------|
| Volume/Å <sup>3</sup>                       | 7451.5(12)                                                     |
| Z                                           | 8                                                              |
| ρ <sub>calc</sub> /g/cm <sup>3</sup>        | 1.263                                                          |
| μ/mm <sup>-1</sup>                          | 1.620                                                          |
| F(000)                                      | 3000.0                                                         |
| Crystal size/mm <sup>3</sup>                | 0.2 × 0.08 × 0.04                                              |
| Radiation                                   | CuKα (λ = 1.54184)                                             |
| 2θ range for data collection/°              | 5.104 to 138.074                                               |
| Index ranges                                | -12 ≤ h ≤ 16, -17 ≤ k ≤ 18, -35 ≤ l ≤ 41                       |
| Reflections collected                       | 47446                                                          |
| Independent reflections                     | 13362 [R <sub>int</sub> = 0.0907, R <sub>sigma</sub> = 0.0786] |
| Data/restraints/parameters                  | 13362/2/904                                                    |
| Goodness-of-fit on F <sup>2</sup>           | 1.078                                                          |
| Final R indexes [I ≥ 2σ (I)]                | R <sub>1</sub> = 0.0705, wR <sub>2</sub> = 0.1731              |
| Final R indexes [all data]                  | R <sub>1</sub> = 0.0795, wR <sub>2</sub> = 0.1790              |
| Largest diff. peak/hole / e Å <sup>-3</sup> | 0.66/-0.71                                                     |
| Flack parameter                             | 0.087(13)                                                      |

**Table 2. Fractional Atomic Coordinates (×10<sup>4</sup>) and Equivalent Isotropic Displacement Parameters (Å<sup>2</sup>×10<sup>3</sup>) for β-(S)-9a. U<sub>eq</sub> is defined as 1/3 of the trace of the orthogonalised U<sub>ij</sub> tensor.**

| Atom | x          | y          | z          | U(eq)    |
|------|------------|------------|------------|----------|
| Cl1  | 7322.2(17) | 4303.4(17) | 7957.0(7)  | 58.2(6)  |
| Cl2  | 5395.8(16) | 4625.1(14) | 7616.9(6)  | 48.1(5)  |
| Si1  | 5016.3(13) | 6356.1(11) | 4248.1(5)  | 21.9(4)  |
| Si2  | 7157.7(14) | 1818.0(13) | 3013.3(6)  | 28.2(4)  |
| O1   | 5091(4)    | 5769(3)    | 4636.9(13) | 25.3(10) |
| O2   | 5242(3)    | 5528(3)    | 5673.1(12) | 20.3(9)  |
| O3   | 6356(3)    | 3566(3)    | 5396.7(13) | 23.7(10) |
| O4   | 5455(3)    | 3530(3)    | 6146.0(12) | 23.1(10) |
| O5   | 7667(3)    | 4388(3)    | 6237.3(13) | 25.3(10) |
| O6   | 6066(4)    | 3717(3)    | 6737.9(14) | 30.9(11) |
| O7   | 3981(3)    | 4455(3)    | 5119.3(13) | 22.6(10) |
| O8   | 5470(3)    | 1125(3)    | 4133.9(12) | 22.0(10) |
| O9   | 7406(3)    | 1479(3)    | 3451.4(13) | 30.7(11) |
| O10  | 3639(3)    | 1900(3)    | 5265.0(13) | 23.6(10) |
| O11  | 5218(3)    | 1761(3)    | 5122.4(12) | 19.1(9)  |

**Table 2. Fractional Atomic Coordinates ( $\times 10^4$ ) and Equivalent Isotropic Displacement Parameters ( $\text{\AA}^2 \times 10^3$ ) for  $\beta$ -(S)-9a.  $U_{\text{eq}}$  is defined as 1/3 of the trace of the orthogonalised  $U_{ij}$  tensor.**

| Atom | <i>x</i> | <i>y</i> | <i>z</i>   | $U(\text{eq})$ |
|------|----------|----------|------------|----------------|
| O12  | 3972(3)  | 3183(3)  | 4627.6(13) | 24.3(10)       |
| O13  | 6696(3)  | 2706(3)  | 4701.7(13) | 22.8(10)       |
| O14  | 7390(3)  | 543(3)   | 4415.2(13) | 23.6(10)       |
| N1   | 6628(4)  | 5378(4)  | 6470.0(15) | 22.3(12)       |
| C2   | 8407(5)  | 5555(4)  | 6557.6(18) | 22.7(14)       |
| N3   | 3371(4)  | 1956(3)  | 4407.5(16) | 21.6(11)       |
| C1   | 1917(5)  | 7688(5)  | 4163(2)    | 34.2(17)       |
| C79  | 2096(5)  | 6932(5)  | 3967(2)    | 35.8(17)       |
| C3   | 2998(5)  | 6529(5)  | 3993(2)    | 33.4(17)       |
| C4   | 3774(5)  | 6872(4)  | 4202.6(19) | 22.0(13)       |
| C5   | 4934(5)  | 6007(4)  | 5029.8(18) | 22.5(14)       |
| C6   | 5408(5)  | 5315(4)  | 5272.5(17) | 18.5(13)       |
| C7   | 5705(5)  | 4883(4)  | 5892.9(18) | 18.1(13)       |
| C8   | 5758(5)  | 4956(4)  | 6333(2)    | 21.6(14)       |
| C9   | 7551(5)  | 5066(4)  | 6405.8(18) | 22.3(14)       |
| C10  | 8336(5)  | 6415(4)  | 6648(2)    | 26.8(15)       |
| C11  | 9152(5)  | 6822(5)  | 6802(2)    | 28.4(15)       |
| C12  | 10031(5) | 6417(4)  | 6866.4(19) | 27.5(15)       |
| C13  | 10922(6) | 6842(5)  | 7032(2)    | 37.6(18)       |
| C14  | 7357(5)  | 8488(4)  | 4405(2)    | 29.8(16)       |
| C15  | 7459(5)  | 7729(5)  | 4597(2)    | 29.8(16)       |
| C16  | 6765(5)  | 7102(4)  | 4542(2)    | 27.2(15)       |
| C17  | 5964(5)  | 7205(4)  | 4292.6(18) | 22.6(14)       |
| C18  | 5905(5)  | 7964(4)  | 4092(2)    | 27.1(15)       |
| C19  | 6594(5)  | 8593(4)  | 4147(2)    | 28.9(15)       |
| C20  | 5023(4)  | 4441(4)  | 5156.7(18) | 19.1(12)       |
| C21  | 5333(5)  | 3743(4)  | 5438.6(18) | 21.8(14)       |
| C22  | 5140(5)  | 4076(4)  | 5834.3(18) | 18.8(13)       |
| C23  | 5811(5)  | 4000(4)  | 6435(2)    | 22.7(14)       |
| C24  | 10088(6) | 5574(5)  | 6765(2)    | 36.4(17)       |
| C25  | 9277(5)  | 5154(5)  | 6612(2)    | 35.2(18)       |
| C26  | 4833(5)  | 5287(4)  | 6541(2)    | 27.2(15)       |
| C27  | 4723(5)  | 6234(4)  | 6554(2)    | 26.3(15)       |
| C28  | 4182(5)  | 6655(5)  | 6283(2)    | 31.9(17)       |
| C29  | 4063(6)  | 7526(5)  | 6299(2)    | 38.7(18)       |
| C30  | 4495(6)  | 7976(5)  | 6585(3)    | 43(2)          |

**Table 2. Fractional Atomic Coordinates ( $\times 10^4$ ) and Equivalent Isotropic Displacement Parameters ( $\text{\AA}^2 \times 10^3$ ) for  $\beta$ -(S)-9a.  $U_{\text{eq}}$  is defined as 1/3 of the trace of the orthogonalised  $U_{ij}$  tensor.**

| Atom | <i>x</i> | <i>y</i> | <i>z</i>   | $U(\text{eq})$ |
|------|----------|----------|------------|----------------|
| C31  | 5065(6)  | 7568(5)  | 6863(3)    | 44(2)          |
| C32  | 5159(6)  | 6692(5)  | 6856(2)    | 34.6(17)       |
| C33  | 2692(6)  | 8030(5)  | 4372(2)    | 32.8(16)       |
| C34  | 3600(5)  | 7642(5)  | 4395(2)    | 32.1(16)       |
| C35  | 5358(5)  | 5578(5)  | 3856(2)    | 29.1(15)       |
| C36  | 4737(6)  | 4774(5)  | 3876(2)    | 33.7(17)       |
| C37  | 6445(5)  | 5340(5)  | 3904(2)    | 33.3(17)       |
| C38  | 5225(6)  | 5984(5)  | 3454(2)    | 37.0(18)       |
| C39  | 225(6)   | 4600(5)  | 3647(2)    | 40.2(19)       |
| C40  | 1060(5)  | 4141(4)  | 3834(2)    | 28.5(16)       |
| C41  | 1306(5)  | 3320(4)  | 3721(2)    | 27.8(15)       |
| C42  | 2062(5)  | 2886(4)  | 3906(2)    | 24.7(14)       |
| C43  | 2578(4)  | 3261(4)  | 4206.4(18) | 20.0(13)       |
| C44  | 3350(5)  | 2803(4)  | 4427.3(19) | 20.6(13)       |
| C45  | 4105(4)  | 1450(4)  | 4603.7(17) | 17.0(12)       |
| C46  | 5142(4)  | 1605(4)  | 4448.8(18) | 19.6(13)       |
| C47  | 6408(5)  | 1456(4)  | 4023.6(18) | 21.5(13)       |
| C48  | 6726(5)  | 975(4)   | 3661(2)    | 26.0(15)       |
| C49  | 5819(5)  | 1995(4)  | 2982(2)    | 28.6(15)       |
| C50  | 5202(6)  | 1487(5)  | 2747(2)    | 35.1(17)       |
| C51  | 4192(6)  | 1537(6)  | 2758(3)    | 45(2)          |
| C52  | 3721(6)  | 2102(6)  | 3003(3)    | 47(2)          |
| C53  | 7960(6)  | -415(5)  | 2180(2)    | 40.9(19)       |
| C54  | 8041(6)  | -499(5)  | 2575(2)    | 37.4(18)       |
| C55  | 7816(5)  | 181(5)   | 2814(2)    | 32.6(17)       |
| C56  | 7500(5)  | 950(5)   | 2668(2)    | 31.6(16)       |
| C57  | 7440(6)  | 1024(5)  | 2263(2)    | 40.3(19)       |
| C58  | 7661(7)  | 350(6)   | 2020(2)    | 49(2)          |
| C59  | 7163(5)  | 1407(4)  | 4352.5(18) | 21.9(13)       |
| C60  | 6793(5)  | 1812(4)  | 4731.8(19) | 20.1(13)       |
| C61  | 5787(4)  | 1433(4)  | 4794.7(18) | 20.0(13)       |
| C62  | 3735(5)  | 528(4)   | 4591.5(19) | 22.5(14)       |
| C63  | 4132(5)  | -78(4)   | 4893.2(19) | 21.6(13)       |
| C64  | 4971(5)  | -559(4)  | 4819(2)    | 24.6(14)       |
| C65  | 5304(5)  | -1131(4) | 5095(2)    | 28.9(16)       |
| C66  | 4814(5)  | -1230(5) | 5435(2)    | 33.1(17)       |

**Table 2. Fractional Atomic Coordinates ( $\times 10^4$ ) and Equivalent Isotropic Displacement Parameters ( $\text{\AA}^2 \times 10^3$ ) for  $\beta$ -(S)-9a.  $U_{\text{eq}}$  is defined as 1/3 of the trace of the orthogonalised  $U_{ij}$  tensor.**

| Atom | x       | y       | z          | U(eq)    |
|------|---------|---------|------------|----------|
| C67  | 3977(5) | -754(5) | 5510(2)    | 30.5(16) |
| C68  | 3648(5) | -178(4) | 5235(2)    | 26.4(15) |
| C69  | 4270(4) | 1748(4) | 5029.1(19) | 19.3(13) |
| C70  | 1613(5) | 4507(4) | 4127(2)    | 28.1(15) |
| C71  | 2354(5) | 4084(4) | 4309.4(19) | 23.0(14) |
| C72  | 5311(6) | 2573(5) | 3216(2)    | 38.4(18) |
| C73  | 4286(6) | 2619(6) | 3242(3)    | 48(2)    |
| C74  | 7951(6) | 2773(5) | 2956(2)    | 35.2(17) |
| C75  | 9039(6) | 2508(6) | 2983(3)    | 46(2)    |
| C76  | 7753(7) | 3409(5) | 3286(2)    | 45(2)    |
| C77  | 7745(6) | 3213(5) | 2564(2)    | 42.7(19) |
| C78  | 6549(7) | 4084(7) | 7568(3)    | 59(3)    |

**Table 3. Anisotropic Displacement Parameters ( $\text{\AA}^2 \times 10^3$ ) for  $\beta$ -(S)-9a. The Anisotropic displacement factor exponent takes the form:  $-2\pi^2[h^2a^{*2}U_{11}+2hka^*b^*U_{12}+\dots]$ .**

| Atom | $U_{11}$ | $U_{22}$ | $U_{33}$ | $U_{23}$ | $U_{13}$ | $U_{12}$ |
|------|----------|----------|----------|----------|----------|----------|
| Cl1  | 46.5(12) | 81.9(17) | 46.1(13) | -9.5(11) | -4.7(10) | -0.9(11) |
| Cl2  | 43.4(11) | 57.0(13) | 43.8(11) | 1.2(10)  | 2.4(9)   | 7.6(10)  |
| Si1  | 20.8(8)  | 25.0(9)  | 19.7(9)  | 0.7(7)   | 0.6(7)   | 0.2(7)   |
| Si2  | 22.5(9)  | 36.7(11) | 25.6(10) | -0.9(8)  | -0.6(8)  | -1.7(8)  |
| O1   | 33(3)    | 26(2)    | 17(2)    | 1.5(18)  | 1(2)     | 1(2)     |
| O2   | 25(2)    | 18(2)    | 18(2)    | 0.8(17)  | -3.8(18) | 0.9(18)  |
| O3   | 21(2)    | 28(2)    | 22(2)    | -4(2)    | -1.9(19) | 0.8(19)  |
| O4   | 29(2)    | 21(2)    | 20(2)    | 2.6(18)  | -2.6(19) | 1.4(19)  |
| O5   | 23(2)    | 23(2)    | 29(3)    | -5(2)    | -2(2)    | 3.5(19)  |
| O6   | 42(3)    | 30(3)    | 21(2)    | 3(2)     | -3(2)    | 0(2)     |
| O7   | 18(2)    | 23(2)    | 27(2)    | -3.1(19) | -1.8(19) | 0.5(18)  |
| O8   | 19(2)    | 26(2)    | 20(2)    | -3.8(18) | 2.2(19)  | -1.8(18) |
| O9   | 23(2)    | 46(3)    | 24(2)    | -3(2)    | 0(2)     | -5(2)    |
| O10  | 21(2)    | 29(2)    | 22(2)    | 1.0(19)  | 2.3(19)  | -0.1(19) |
| O11  | 15(2)    | 24(2)    | 18(2)    | -2.5(17) | 1.1(17)  | -1.7(17) |
| O12  | 21(2)    | 28(2)    | 24(2)    | -3.5(19) | -5.8(19) | 1.3(19)  |
| O13  | 20(2)    | 20(2)    | 29(3)    | -6.2(19) | 5.0(19)  | -5.6(18) |
| O14  | 23(2)    | 18(2)    | 30(3)    | -1.6(18) | -2(2)    | 2.7(18)  |
| N1   | 20(3)    | 30(3)    | 16(3)    | -6(2)    | -2(2)    | 2(2)     |

**Table 3. Anisotropic Displacement Parameters ( $\text{\AA}^2 \times 10^3$ ) for  $\beta$ -(S)-9a. The Anisotropic displacement factor exponent takes the form:  $-2\pi^2[h^2a^{*2}U_{11}+2hka^*b^*U_{12}+\dots]$ .**

| Atom | $U_{11}$ | $U_{22}$ | $U_{33}$ | $U_{23}$ | $U_{13}$ | $U_{12}$ |
|------|----------|----------|----------|----------|----------|----------|
| C2   | 28(3)    | 25(3)    | 16(3)    | 0(3)     | -3(3)    | 2(3)     |
| N3   | 15(3)    | 25(3)    | 24(3)    | 3(2)     | -8(2)    | 1(2)     |
| C1   | 25(4)    | 39(4)    | 39(4)    | 9(3)     | 0(3)     | 3(3)     |
| C79  | 26(4)    | 33(4)    | 49(5)    | -4(3)    | -3(3)    | 0(3)     |
| C3   | 24(4)    | 36(4)    | 40(4)    | 0(3)     | -7(3)    | -1(3)    |
| C4   | 22(3)    | 20(3)    | 24(3)    | 1(3)     | -2(3)    | 3(3)     |
| C5   | 23(3)    | 26(3)    | 19(3)    | -1(3)    | 2(3)     | 5(3)     |
| C6   | 22(3)    | 21(3)    | 12(3)    | -1(2)    | 2(3)     | -4(2)    |
| C7   | 19(3)    | 17(3)    | 18(3)    | 3(2)     | -2(2)    | 0(2)     |
| C8   | 22(3)    | 18(3)    | 25(4)    | -1(3)    | 4(3)     | 1(2)     |
| C9   | 24(3)    | 30(4)    | 13(3)    | 1(3)     | 1(3)     | 4(3)     |
| C10  | 23(3)    | 31(4)    | 27(4)    | -1(3)    | 1(3)     | 8(3)     |
| C11  | 29(4)    | 29(4)    | 28(4)    | -4(3)    | 0(3)     | -2(3)    |
| C12  | 27(3)    | 32(4)    | 23(3)    | 2(3)     | 1(3)     | -3(3)    |
| C13  | 29(4)    | 40(4)    | 44(5)    | -5(4)    | -10(4)   | 2(3)     |
| C14  | 23(3)    | 29(4)    | 38(4)    | -6(3)    | -2(3)    | -6(3)    |
| C15  | 23(4)    | 37(4)    | 30(4)    | -5(3)    | 0(3)     | -4(3)    |
| C16  | 24(4)    | 29(4)    | 28(4)    | 0(3)     | 0(3)     | 1(3)     |
| C17  | 21(3)    | 30(4)    | 18(3)    | 3(3)     | 6(3)     | -1(3)    |
| C18  | 28(4)    | 30(4)    | 23(4)    | 0(3)     | 1(3)     | 3(3)     |
| C19  | 31(4)    | 21(3)    | 35(4)    | 2(3)     | 6(3)     | -2(3)    |
| C20  | 15(3)    | 23(3)    | 20(3)    | -3(2)    | -4(3)    | -3(2)    |
| C21  | 20(3)    | 25(3)    | 21(3)    | -4(3)    | -3(3)    | -3(3)    |
| C22  | 20(3)    | 18(3)    | 18(3)    | 4(2)     | 1(3)     | -1(2)    |
| C23  | 21(3)    | 22(3)    | 25(4)    | -3(3)    | 1(3)     | -2(3)    |
| C24  | 27(4)    | 38(4)    | 44(4)    | -11(3)   | -8(3)    | 5(3)     |
| C25  | 29(4)    | 41(4)    | 35(4)    | -10(3)   | -1(3)    | 1(3)     |
| C26  | 25(4)    | 34(4)    | 23(4)    | -6(3)    | 3(3)     | 2(3)     |
| C27  | 26(4)    | 28(4)    | 25(4)    | -2(3)    | 7(3)     | 2(3)     |
| C28  | 30(4)    | 35(4)    | 31(4)    | 0(3)     | -1(3)    | 15(3)    |
| C29  | 49(5)    | 37(4)    | 29(4)    | 2(3)     | 3(4)     | 11(4)    |
| C30  | 40(5)    | 33(4)    | 56(5)    | 4(4)     | 17(4)    | 3(3)     |
| C31  | 33(4)    | 38(4)    | 61(6)    | -20(4)   | -3(4)    | 2(4)     |
| C32  | 32(4)    | 35(4)    | 36(4)    | -14(3)   | -5(3)    | 8(3)     |
| C33  | 29(4)    | 37(4)    | 32(4)    | -1(3)    | 2(3)     | 3(3)     |
| C34  | 26(4)    | 39(4)    | 31(4)    | -6(3)    | 0(3)     | 0(3)     |
| C35  | 28(4)    | 34(4)    | 25(4)    | 0(3)     | 1(3)     | 5(3)     |



**Table 3. Anisotropic Displacement Parameters ( $\text{\AA}^2 \times 10^3$ ) for  $\beta$ -(S)-9a. The Anisotropic displacement factor exponent takes the form:  $-2\pi^2[h^2a^{*2}U_{11}+2hka^*b^*U_{12}+\dots]$ .**

| Atom | $U_{11}$ | $U_{22}$ | $U_{33}$ | $U_{23}$ | $U_{13}$ | $U_{12}$ |
|------|----------|----------|----------|----------|----------|----------|
| C36  | 40(4)    | 31(4)    | 29(4)    | -4(3)    | 4(3)     | -4(3)    |
| C37  | 31(4)    | 40(4)    | 29(4)    | -7(3)    | 3(3)     | 8(3)     |
| C38  | 36(4)    | 46(5)    | 30(4)    | 1(3)     | -3(3)    | -3(4)    |
| C39  | 37(4)    | 38(4)    | 46(5)    | -1(4)    | -15(4)   | 9(3)     |
| C40  | 22(3)    | 28(4)    | 35(4)    | 4(3)     | -3(3)    | 3(3)     |
| C41  | 31(4)    | 25(4)    | 27(4)    | 3(3)     | -9(3)    | 2(3)     |
| C42  | 26(4)    | 24(3)    | 24(3)    | 2(3)     | -5(3)    | 1(3)     |
| C43  | 16(3)    | 21(3)    | 22(3)    | 5(3)     | -1(3)    | 0(2)     |
| C44  | 15(3)    | 26(3)    | 20(3)    | 3(3)     | 1(3)     | 0(3)     |
| C45  | 17(3)    | 20(3)    | 14(3)    | -1(2)    | -4(2)    | 3(2)     |
| C46  | 16(3)    | 26(3)    | 16(3)    | -5(2)    | 2(2)     | 0(2)     |
| C47  | 19(3)    | 26(3)    | 20(3)    | -5(3)    | 1(3)     | 0(3)     |
| C48  | 30(4)    | 27(4)    | 21(4)    | -3(3)    | -1(3)    | -7(3)    |
| C49  | 35(4)    | 30(4)    | 21(4)    | 6(3)     | 6(3)     | -3(3)    |
| C50  | 32(4)    | 35(4)    | 39(4)    | 2(3)     | -3(3)    | -2(3)    |
| C51  | 30(4)    | 56(5)    | 50(5)    | -1(4)    | -9(4)    | -4(4)    |
| C52  | 24(4)    | 56(6)    | 61(6)    | 12(4)    | -8(4)    | 1(4)     |
| C53  | 42(5)    | 46(5)    | 35(4)    | -18(4)   | -4(4)    | 2(4)     |
| C54  | 31(4)    | 39(4)    | 41(5)    | -5(4)    | 0(3)     | 1(3)     |
| C55  | 25(4)    | 50(5)    | 23(4)    | -4(3)    | 1(3)     | -3(3)    |
| C56  | 29(4)    | 41(4)    | 25(4)    | -1(3)    | 1(3)     | -2(3)    |
| C57  | 48(5)    | 45(5)    | 28(4)    | -5(3)    | -7(4)    | 9(4)     |
| C58  | 47(5)    | 71(6)    | 28(4)    | -13(4)   | -2(4)    | 5(5)     |
| C59  | 23(3)    | 19(3)    | 24(3)    | -4(3)    | 1(3)     | 3(3)     |
| C60  | 21(3)    | 16(3)    | 23(3)    | 0(3)     | 0(3)     | 4(2)     |
| C61  | 15(3)    | 27(3)    | 18(3)    | -4(3)    | 1(3)     | -5(3)    |
| C62  | 22(3)    | 22(3)    | 24(3)    | 1(3)     | -4(3)    | 1(3)     |
| C63  | 19(3)    | 21(3)    | 25(3)    | -2(3)    | -1(3)    | -3(2)    |
| C64  | 23(3)    | 26(3)    | 25(3)    | -3(3)    | 1(3)     | -4(3)    |
| C65  | 20(3)    | 25(4)    | 42(4)    | -2(3)    | -3(3)    | 0(3)     |
| C66  | 31(4)    | 32(4)    | 37(4)    | 6(3)     | -8(3)    | -1(3)    |
| C67  | 29(4)    | 38(4)    | 25(4)    | 7(3)     | 3(3)     | -1(3)    |
| C68  | 25(3)    | 23(3)    | 31(4)    | 0(3)     | 6(3)     | -1(3)    |
| C69  | 18(3)    | 16(3)    | 24(3)    | 5(3)     | 1(3)     | 4(2)     |
| C70  | 29(4)    | 22(3)    | 32(4)    | 1(3)     | -7(3)    | 4(3)     |
| C71  | 22(3)    | 24(3)    | 24(3)    | -2(3)    | 0(3)     | 0(3)     |
| C72  | 27(4)    | 40(4)    | 48(5)    | -6(4)    | 1(4)     | -1(3)    |

**Table 3. Anisotropic Displacement Parameters ( $\text{\AA}^2 \times 10^3$ ) for  $\beta$ -(S)-9a. The Anisotropic displacement factor exponent takes the form:  $-2\pi^2[h^2a^{*2}U_{11}+2hka^*b^*U_{12}+\dots]$ .**

| Atom | $U_{11}$ | $U_{22}$ | $U_{33}$ | $U_{23}$ | $U_{13}$ | $U_{12}$ |
|------|----------|----------|----------|----------|----------|----------|
| C73  | 41(5)    | 46(5)    | 57(6)    | 5(4)     | 7(4)     | 5(4)     |
| C74  | 36(4)    | 43(4)    | 26(4)    | -2(3)    | 4(3)     | -4(3)    |
| C75  | 28(4)    | 52(5)    | 56(5)    | 0(4)     | -3(4)    | -13(4)   |
| C76  | 45(5)    | 45(5)    | 43(5)    | -7(4)    | 1(4)     | -11(4)   |
| C77  | 37(4)    | 51(5)    | 39(5)    | 9(4)     | -2(4)    | -8(4)    |
| C78  | 49(5)    | 74(7)    | 54(6)    | -23(5)   | -8(5)    | 21(5)    |

**Table 4. Bond Lengths for  $\beta$ -(S)-9a.**

| Atom | Atom | Length/ $\text{\AA}$ | Atom | Atom | Length/ $\text{\AA}$ |
|------|------|----------------------|------|------|----------------------|
| C11  | C78  | 1.742(10)            | C17  | C18  | 1.395(9)             |
| C12  | C78  | 1.791(9)             | C18  | C19  | 1.381(10)            |
| Si1  | O1   | 1.641(5)             | C20  | C21  | 1.537(9)             |
| Si1  | C4   | 1.878(7)             | C21  | C22  | 1.492(9)             |
| Si1  | C17  | 1.868(7)             | C24  | C25  | 1.390(11)            |
| Si1  | C35  | 1.894(7)             | C26  | C27  | 1.513(10)            |
| Si2  | O9   | 1.644(5)             | C27  | C28  | 1.366(10)            |
| Si2  | C49  | 1.838(8)             | C27  | C32  | 1.405(10)            |
| Si2  | C56  | 1.882(8)             | C28  | C29  | 1.395(11)            |
| Si2  | C74  | 1.870(8)             | C29  | C30  | 1.354(12)            |
| O1   | C5   | 1.428(7)             | C30  | C31  | 1.392(12)            |
| O2   | C6   | 1.445(7)             | C31  | C32  | 1.399(11)            |
| O2   | C7   | 1.422(7)             | C33  | C34  | 1.377(10)            |
| O3   | C21  | 1.422(8)             | C35  | C36  | 1.532(10)            |
| O4   | C22  | 1.449(7)             | C35  | C37  | 1.529(10)            |
| O4   | C23  | 1.339(8)             | C35  | C38  | 1.544(10)            |
| O5   | C9   | 1.235(8)             | C39  | C40  | 1.493(10)            |
| O6   | C23  | 1.191(8)             | C40  | C41  | 1.401(10)            |
| O7   | C20  | 1.417(7)             | C40  | C70  | 1.389(10)            |
| O8   | C46  | 1.403(7)             | C41  | C42  | 1.391(9)             |
| O8   | C47  | 1.428(8)             | C42  | C43  | 1.387(9)             |
| O9   | C48  | 1.420(8)             | C43  | C44  | 1.486(9)             |
| O10  | C69  | 1.207(8)             | C43  | C71  | 1.389(9)             |
| O11  | C61  | 1.467(7)             | C45  | C46  | 1.523(9)             |
| O11  | C69  | 1.325(8)             | C45  | C62  | 1.550(9)             |
| O12  | C44  | 1.246(8)             | C45  | C69  | 1.563(9)             |
| O13  | C60  | 1.431(8)             | C46  | C61  | 1.508(9)             |

**Table 4. Bond Lengths for  $\beta$ -(S)-9a.**

| Atom | Atom | Length/Å  | Atom | Atom | Length/Å  |
|------|------|-----------|------|------|-----------|
| O14  | C59  | 1.424(8)  | C47  | C48  | 1.531(9)  |
| N1   | C8   | 1.436(8)  | C47  | C59  | 1.532(9)  |
| N1   | C9   | 1.364(9)  | C49  | C50  | 1.417(10) |
| C2   | C9   | 1.491(9)  | C49  | C72  | 1.406(11) |
| C2   | C10  | 1.407(10) | C50  | C51  | 1.372(11) |
| C2   | C25  | 1.352(10) | C51  | C52  | 1.391(13) |
| N3   | C44  | 1.348(8)  | C52  | C73  | 1.394(13) |
| N3   | C45  | 1.447(8)  | C53  | C54  | 1.379(12) |
| C1   | C79  | 1.401(11) | C53  | C58  | 1.397(13) |
| C1   | C33  | 1.386(11) | C54  | C55  | 1.393(11) |
| C79  | C3   | 1.382(10) | C55  | C56  | 1.390(11) |
| C3   | C4   | 1.390(10) | C56  | C57  | 1.412(10) |
| C4   | C34  | 1.412(10) | C57  | C58  | 1.393(11) |
| C5   | C6   | 1.525(9)  | C59  | C60  | 1.546(9)  |
| C6   | C20  | 1.537(8)  | C60  | C61  | 1.505(8)  |
| C7   | C8   | 1.529(9)  | C62  | C63  | 1.518(9)  |
| C7   | C22  | 1.507(9)  | C63  | C64  | 1.392(9)  |
| C8   | C23  | 1.563(9)  | C63  | C68  | 1.362(10) |
| C8   | C26  | 1.538(9)  | C64  | C65  | 1.393(10) |
| C10  | C11  | 1.387(10) | C65  | C66  | 1.360(11) |
| C11  | C12  | 1.371(10) | C66  | C67  | 1.387(10) |
| C12  | C13  | 1.497(10) | C67  | C68  | 1.396(10) |
| C12  | C24  | 1.388(10) | C70  | C71  | 1.364(9)  |
| C14  | C15  | 1.385(10) | C72  | C73  | 1.393(12) |
| C14  | C19  | 1.376(10) | C74  | C75  | 1.534(11) |
| C15  | C16  | 1.383(10) | C74  | C76  | 1.549(11) |
| C16  | C17  | 1.396(10) | C74  | C77  | 1.553(11) |

**Table 5. Bond Angles for  $\beta$ -(S)-9a.**

| Atom | Atom | Atom | Angle/°  | Atom | Atom | Atom | Angle/°  |
|------|------|------|----------|------|------|------|----------|
| O1   | Si1  | C4   | 111.9(3) | C31  | C32  | C27  | 119.3(7) |
| O1   | Si1  | C17  | 107.5(3) | C34  | C33  | C1   | 122.0(7) |
| O1   | Si1  | C35  | 101.7(3) | C33  | C34  | C4   | 120.7(7) |
| C4   | Si1  | C35  | 116.3(3) | C36  | C35  | Si1  | 112.2(5) |
| C17  | Si1  | C4   | 107.9(3) | C36  | C35  | C38  | 109.1(6) |
| C17  | Si1  | C35  | 111.3(3) | C37  | C35  | Si1  | 108.5(5) |
| O9   | Si2  | C49  | 107.8(3) | C37  | C35  | C36  | 108.5(6) |

**Table 5. Bond Angles for  $\beta$ -(S)-9a.**

| Atom | Atom | Atom | Angle/°  | Atom | Atom | Atom | Angle/°  |
|------|------|------|----------|------|------|------|----------|
| O9   | Si2  | C56  | 107.2(3) | C37  | C35  | C38  | 108.3(6) |
| O9   | Si2  | C74  | 104.3(3) | C38  | C35  | Si1  | 110.2(5) |
| C49  | Si2  | C56  | 108.5(3) | C41  | C40  | C39  | 121.0(7) |
| C49  | Si2  | C74  | 115.9(4) | C70  | C40  | C39  | 121.4(7) |
| C74  | Si2  | C56  | 112.6(3) | C70  | C40  | C41  | 117.7(6) |
| C5   | O1   | Si1  | 128.5(4) | C42  | C41  | C40  | 120.6(7) |
| C7   | O2   | C6   | 106.0(4) | C43  | C42  | C41  | 120.1(6) |
| C23  | O4   | C22  | 109.3(5) | C42  | C43  | C44  | 122.0(6) |
| C46  | O8   | C47  | 106.8(4) | C42  | C43  | C71  | 119.1(6) |
| C48  | O9   | Si2  | 121.6(4) | C71  | C43  | C44  | 118.8(6) |
| C69  | O11  | C61  | 108.4(5) | O12  | C44  | N3   | 119.8(6) |
| C9   | N1   | C8   | 121.9(5) | O12  | C44  | C43  | 121.7(6) |
| C10  | C2   | C9   | 122.1(6) | N3   | C44  | C43  | 118.5(6) |
| C25  | C2   | C9   | 118.7(6) | N3   | C45  | C46  | 112.2(5) |
| C25  | C2   | C10  | 119.1(7) | N3   | C45  | C62  | 106.9(5) |
| C44  | N3   | C45  | 123.0(5) | N3   | C45  | C69  | 111.9(5) |
| C33  | C1   | C79  | 117.3(7) | C46  | C45  | C62  | 116.1(5) |
| C3   | C79  | C1   | 121.2(7) | C46  | C45  | C69  | 98.7(5)  |
| C79  | C3   | C4   | 121.4(7) | C62  | C45  | C69  | 111.0(5) |
| C3   | C4   | Si1  | 123.4(5) | O8   | C46  | C45  | 118.6(5) |
| C3   | C4   | C34  | 117.3(6) | O8   | C46  | C61  | 109.6(5) |
| C34  | C4   | Si1  | 119.3(5) | C61  | C46  | C45  | 103.0(5) |
| O1   | C5   | C6   | 105.8(5) | O8   | C47  | C48  | 106.6(5) |
| O2   | C6   | C5   | 107.1(5) | O8   | C47  | C59  | 112.1(5) |
| O2   | C6   | C20  | 114.2(5) | C48  | C47  | C59  | 113.4(5) |
| C5   | C6   | C20  | 111.4(5) | O9   | C48  | C47  | 108.7(5) |
| O2   | C7   | C8   | 119.9(5) | C50  | C49  | Si2  | 121.9(6) |
| O2   | C7   | C22  | 108.5(5) | C72  | C49  | Si2  | 123.3(6) |
| C22  | C7   | C8   | 102.9(5) | C72  | C49  | C50  | 114.5(7) |
| N1   | C8   | C7   | 113.9(5) | C51  | C50  | C49  | 122.6(8) |
| N1   | C8   | C23  | 109.9(5) | C50  | C51  | C52  | 120.7(8) |
| N1   | C8   | C26  | 110.7(5) | C51  | C52  | C73  | 119.4(8) |
| C7   | C8   | C23  | 98.9(5)  | C54  | C53  | C58  | 120.0(7) |
| C7   | C8   | C26  | 117.1(6) | C53  | C54  | C55  | 119.7(8) |
| C26  | C8   | C23  | 105.2(5) | C56  | C55  | C54  | 122.3(7) |
| O5   | C9   | N1   | 120.7(6) | C55  | C56  | Si2  | 119.4(5) |
| O5   | C9   | C2   | 121.5(6) | C55  | C56  | C57  | 116.8(7) |
| N1   | C9   | C2   | 117.8(6) | C57  | C56  | Si2  | 123.8(6) |

**Table 5. Bond Angles for  $\beta$ -(S)-9a.**

| Atom | Atom | Atom | Angle/°  | Atom | Atom | Atom | Angle/°  |
|------|------|------|----------|------|------|------|----------|
| C11  | C10  | C2   | 119.0(6) | C58  | C57  | C56  | 121.6(8) |
| C12  | C11  | C10  | 122.3(7) | C57  | C58  | C53  | 119.4(8) |
| C11  | C12  | C13  | 123.4(7) | O14  | C59  | C47  | 107.8(5) |
| C11  | C12  | C24  | 117.4(7) | O14  | C59  | C60  | 110.0(5) |
| C24  | C12  | C13  | 119.2(7) | C47  | C59  | C60  | 113.2(5) |
| C19  | C14  | C15  | 119.5(6) | O13  | C60  | C59  | 112.4(5) |
| C16  | C15  | C14  | 119.5(7) | O13  | C60  | C61  | 108.9(5) |
| C15  | C16  | C17  | 122.0(7) | C61  | C60  | C59  | 104.5(5) |
| C16  | C17  | Si1  | 120.0(5) | O11  | C61  | C46  | 104.2(5) |
| C18  | C17  | Si1  | 123.0(5) | O11  | C61  | C60  | 116.4(5) |
| C18  | C17  | C16  | 117.0(6) | C60  | C61  | C46  | 109.7(5) |
| C19  | C18  | C17  | 121.2(7) | C63  | C62  | C45  | 117.8(5) |
| C14  | C19  | C18  | 120.6(7) | C64  | C63  | C62  | 120.7(6) |
| O7   | C20  | C6   | 110.4(5) | C68  | C63  | C62  | 120.1(6) |
| O7   | C20  | C21  | 109.9(5) | C68  | C63  | C64  | 119.2(6) |
| C21  | C20  | C6   | 113.2(5) | C63  | C64  | C65  | 119.8(6) |
| O3   | C21  | C20  | 110.1(5) | C66  | C65  | C64  | 120.7(7) |
| O3   | C21  | C22  | 109.5(5) | C65  | C66  | C67  | 119.9(7) |
| C22  | C21  | C20  | 106.2(5) | C66  | C67  | C68  | 119.3(7) |
| O4   | C22  | C7   | 105.0(5) | C63  | C68  | C67  | 121.1(6) |
| O4   | C22  | C21  | 114.8(5) | O10  | C69  | O11  | 121.3(6) |
| C21  | C22  | C7   | 109.7(5) | O10  | C69  | C45  | 126.6(6) |
| O4   | C23  | C8   | 110.8(6) | O11  | C69  | C45  | 111.9(5) |
| O6   | C23  | O4   | 123.5(6) | C71  | C70  | C40  | 121.9(7) |
| O6   | C23  | C8   | 125.5(6) | C70  | C71  | C43  | 120.4(6) |
| C12  | C24  | C25  | 121.0(7) | C73  | C72  | C49  | 123.9(8) |
| C2   | C25  | C24  | 121.0(7) | C72  | C73  | C52  | 118.6(9) |
| C27  | C26  | C8   | 115.7(6) | C75  | C74  | Si2  | 108.9(6) |
| C28  | C27  | C26  | 121.3(7) | C75  | C74  | C76  | 107.4(7) |
| C28  | C27  | C32  | 119.0(7) | C75  | C74  | C77  | 110.5(7) |
| C32  | C27  | C26  | 119.7(6) | C76  | C74  | Si2  | 110.6(5) |
| C27  | C28  | C29  | 121.3(7) | C76  | C74  | C77  | 108.6(7) |
| C30  | C29  | C28  | 120.2(8) | C77  | C74  | Si2  | 110.8(5) |
| C29  | C30  | C31  | 119.9(8) | C11  | C78  | C12  | 110.8(5) |
| C30  | C31  | C32  | 120.2(8) |      |      |      |          |

**Table 6. Torsion Angles for  $\beta$ -(S)-9a.**

| A   | B   | C   | D   | Angle/°   | A   | B   | C   | D   | Angle/°   |
|-----|-----|-----|-----|-----------|-----|-----|-----|-----|-----------|
| Si1 | O1  | C5  | C6  | -162.5(4) | C22 | C7  | C8  | N1  | 149.5(5)  |
| Si1 | C4  | C34 | C33 | -179.0(6) | C22 | C7  | C8  | C23 | 32.9(6)   |
| Si1 | C17 | C18 | C19 | 176.6(5)  | C22 | C7  | C8  | C26 | -79.3(7)  |
| Si2 | O9  | C48 | C47 | -117.1(5) | C23 | O4  | C22 | C7  | 22.4(6)   |
| Si2 | C49 | C50 | C51 | 171.3(7)  | C23 | O4  | C22 | C21 | 142.9(6)  |
| Si2 | C49 | C72 | C73 | -169.2(7) | C23 | C8  | C26 | C27 | 168.3(6)  |
| Si2 | C56 | C57 | C58 | -177.2(7) | C25 | C2  | C9  | O5  | -19.1(10) |
| O1  | Si1 | C4  | C3  | -93.5(6)  | C25 | C2  | C9  | N1  | 158.8(7)  |
| O1  | Si1 | C4  | C34 | 85.3(6)   | C25 | C2  | C10 | C11 | -1.9(10)  |
| O1  | Si1 | C17 | C16 | 20.8(6)   | C26 | C8  | C23 | O4  | 99.9(6)   |
| O1  | Si1 | C17 | C18 | -157.8(5) | C26 | C8  | C23 | O6  | -75.3(8)  |
| O1  | Si1 | C35 | C36 | 52.3(6)   | C26 | C27 | C28 | C29 | 178.6(7)  |
| O1  | Si1 | C35 | C37 | -67.6(5)  | C26 | C27 | C32 | C31 | 179.1(7)  |
| O1  | Si1 | C35 | C38 | 174.0(5)  | C27 | C28 | C29 | C30 | 0.7(12)   |
| O1  | C5  | C6  | O2  | -178.8(5) | C28 | C27 | C32 | C31 | -2.8(11)  |
| O1  | C5  | C6  | C20 | -53.3(7)  | C28 | C29 | C30 | C31 | 0.3(13)   |
| O2  | C6  | C20 | O7  | 75.6(6)   | C29 | C30 | C31 | C32 | -2.6(13)  |
| O2  | C6  | C20 | C21 | -48.1(7)  | C30 | C31 | C32 | C27 | 3.9(12)   |
| O2  | C7  | C8  | N1  | -90.0(7)  | C32 | C27 | C28 | C29 | 0.5(11)   |
| O2  | C7  | C8  | C23 | 153.5(5)  | C33 | C1  | C79 | C3  | 2.4(12)   |
| O2  | C7  | C8  | C26 | 41.3(8)   | C35 | Si1 | O1  | C5  | 178.7(6)  |
| O2  | C7  | C22 | O4  | -163.4(5) | C35 | Si1 | C4  | C3  | 22.7(7)   |
| O2  | C7  | C22 | C21 | 72.7(6)   | C35 | Si1 | C4  | C34 | -158.4(5) |
| O3  | C21 | C22 | O4  | -56.7(7)  | C35 | Si1 | C17 | C16 | -89.7(6)  |
| O3  | C21 | C22 | C7  | 61.3(7)   | C35 | Si1 | C17 | C18 | 91.7(6)   |
| O7  | C20 | C21 | O3  | 163.7(5)  | C39 | C40 | C41 | C42 | -177.8(7) |
| O7  | C20 | C21 | C22 | -77.8(6)  | C39 | C40 | C70 | C71 | 177.6(7)  |
| O8  | C46 | C61 | O11 | -164.1(5) | C40 | C41 | C42 | C43 | 0.6(11)   |
| O8  | C46 | C61 | C60 | 70.6(6)   | C40 | C70 | C71 | C43 | -0.2(11)  |
| O8  | C47 | C48 | O9  | 156.2(5)  | C41 | C40 | C70 | C71 | -1.7(11)  |
| O8  | C47 | C59 | O14 | 68.8(6)   | C41 | C42 | C43 | C44 | 176.2(6)  |
| O8  | C47 | C59 | C60 | -53.1(7)  | C41 | C42 | C43 | C71 | -2.5(10)  |
| O9  | Si2 | C49 | C50 | -112.0(6) | C42 | C43 | C44 | O12 | 162.1(6)  |
| O9  | Si2 | C49 | C72 | 61.0(7)   | C42 | C43 | C44 | N3  | -17.8(9)  |
| O9  | Si2 | C56 | C55 | 4.6(7)    | C42 | C43 | C71 | C70 | 2.4(10)   |
| O9  | Si2 | C56 | C57 | -176.6(6) | C44 | N3  | C45 | C46 | -64.9(8)  |
| O9  | Si2 | C74 | C75 | 62.6(6)   | C44 | N3  | C45 | C62 | 166.7(6)  |
| O9  | Si2 | C74 | C76 | -55.2(6)  | C44 | N3  | C45 | C69 | 45.0(8)   |
| O9  | Si2 | C74 | C77 | -175.7(5) | C44 | C43 | C71 | C70 | -176.4(6) |

**Table 6. Torsion Angles for  $\beta$ -(S)-9a.**

|                 |           |                 |           |
|-----------------|-----------|-----------------|-----------|
| O13 C60 C61 O11 | -54.7(7)  | C45 N3 C44 O12  | -1.3(10)  |
| O13 C60 C61 C46 | 63.3(6)   | C45 N3 C44 C43  | 178.5(6)  |
| O14 C59 C60 O13 | 171.1(5)  | C45 C46 C61 O11 | -36.9(6)  |
| O14 C59 C60 C61 | -70.9(6)  | C45 C46 C61 C60 | -162.3(5) |
| N1 C8 C23 O4    | -140.9(5) | C45 C62 C63 C64 | -91.8(7)  |
| N1 C8 C23 O6    | 43.9(9)   | C45 C62 C63 C68 | 90.6(8)   |
| N1 C8 C26 C27   | 49.7(8)   | C46 O8 C47 C48  | -175.7(5) |
| C2 C10 C11 C12  | 0.5(11)   | C46 O8 C47 C59  | 59.7(6)   |
| N3 C45 C46 O8   | -88.2(7)  | C46 C45 C62 C63 | 76.3(7)   |
| N3 C45 C46 C61  | 150.7(5)  | C46 C45 C69 O10 | 165.9(6)  |
| N3 C45 C62 C63  | -157.5(6) | C46 C45 C69 O11 | -19.0(6)  |
| N3 C45 C69 O10  | 47.7(8)   | C47 O8 C46 C45  | 173.9(5)  |
| N3 C45 C69 O11  | -137.3(5) | C47 O8 C46 C61  | -68.3(6)  |
| C1 C79 C3 C4    | -2.5(12)  | C47 C59 C60 O13 | -68.2(7)  |
| C1 C33 C34 C4   | 0.1(12)   | C47 C59 C60 C61 | 49.8(7)   |
| C79 C1 C33 C34  | -1.2(12)  | C48 C47 C59 O14 | -51.9(7)  |
| C79 C3 C4 Si1   | -179.9(6) | C48 C47 C59 C60 | -173.9(5) |
| C79 C3 C4 C34   | 1.3(11)   | C49 Si2 O9 C48  | 32.5(6)   |
| C3 C4 C34 C33   | -0.1(11)  | C49 Si2 C56 C55 | -111.5(6) |
| C4 Si1 O1 C5    | -56.5(6)  | C49 Si2 C56 C57 | 67.2(7)   |
| C4 Si1 C17 C16  | 141.6(5)  | C49 Si2 C74 C75 | -179.1(5) |
| C4 Si1 C17 C18  | -37.0(6)  | C49 Si2 C74 C76 | 63.1(7)   |
| C4 Si1 C35 C36  | -69.5(6)  | C49 Si2 C74 C77 | -57.4(7)  |
| C4 Si1 C35 C37  | 170.6(5)  | C49 C50 C51 C52 | 0.4(13)   |
| C4 Si1 C35 C38  | 52.2(6)   | C49 C72 C73 C52 | -4.4(14)  |
| C5 C6 C20 O7    | -45.9(7)  | C50 C49 C72 C73 | 4.3(12)   |
| C5 C6 C20 C21   | -169.6(5) | C50 C51 C52 C73 | -0.3(14)  |
| C6 O2 C7 C8     | 174.1(5)  | C51 C52 C73 C72 | 2.2(14)   |
| C6 O2 C7 C22    | -68.3(6)  | C53 C54 C55 C56 | 0.6(12)   |
| C6 C20 C21 O3   | -72.3(7)  | C54 C53 C58 C57 | -0.3(13)  |
| C6 C20 C21 C22  | 46.2(7)   | C54 C55 C56 Si2 | 177.3(6)  |
| C7 O2 C6 C5     | -179.1(5) | C54 C55 C56 C57 | -1.6(11)  |
| C7 O2 C6 C20    | 57.1(6)   | C55 C56 C57 C58 | 1.6(12)   |
| C7 C8 C23 O4    | -21.4(7)  | C56 Si2 O9 C48  | -84.1(5)  |
| C7 C8 C23 O6    | 163.4(7)  | C56 Si2 C49 C50 | 3.8(7)    |
| C7 C8 C26 C27   | -83.1(7)  | C56 Si2 C49 C72 | 176.7(6)  |
| C8 N1 C9 O5     | -2.6(9)   | C56 Si2 C74 C75 | -53.3(7)  |
| C8 N1 C9 C2     | 179.5(6)  | C56 Si2 C74 C76 | -171.1(6) |

**Table 6. Torsion Angles for  $\beta$ -(S)-9a.**

|                 |           |                 |           |
|-----------------|-----------|-----------------|-----------|
| C8 C7 C22 O4    | -35.3(6)  | C56 Si2 C74 C77 | 68.4(6)   |
| C8 C7 C22 C21   | -159.3(5) | C56 C57 C58 C53 | -0.7(14)  |
| C8 C26 C27 C28  | 94.1(8)   | C58 C53 C54 C55 | 0.4(12)   |
| C8 C26 C27 C32  | -87.8(8)  | C59 C47 C48 O9  | -80.0(7)  |
| C9 N1 C8 C7     | -62.3(8)  | C59 C60 C61 O11 | -175.0(5) |
| C9 N1 C8 C23    | 47.6(8)   | C59 C60 C61 C46 | -57.0(6)  |
| C9 N1 C8 C26    | 163.3(6)  | C61 O11 C69 O10 | 171.7(6)  |
| C9 C2 C10 C11   | 177.6(6)  | C61 O11 C69 C45 | -3.6(7)   |
| C9 C2 C25 C24   | -177.9(7) | C62 C45 C46 O8  | 35.2(8)   |
| C10 C2 C9 O5    | 161.4(6)  | C62 C45 C46 C61 | -86.0(6)  |
| C10 C2 C9 N1    | -20.7(9)  | C62 C45 C69 O10 | -71.6(8)  |
| C10 C2 C25 C24  | 1.7(11)   | C62 C45 C69 O11 | 103.4(6)  |
| C10 C11 C12 C13 | -180.0(7) | C62 C63 C64 C65 | -177.9(6) |
| C10 C11 C12 C24 | 1.2(11)   | C62 C63 C68 C67 | 177.5(6)  |
| C11 C12 C24 C25 | -1.5(11)  | C63 C64 C65 C66 | 0.6(10)   |
| C12 C24 C25 C2  | 0.1(13)   | C64 C63 C68 C67 | -0.2(10)  |
| C13 C12 C24 C25 | 179.6(8)  | C64 C65 C66 C67 | -0.4(11)  |
| C14 C15 C16 C17 | 0.8(11)   | C65 C66 C67 C68 | 0.0(11)   |
| C15 C14 C19 C18 | 2.9(11)   | C66 C67 C68 C63 | 0.3(11)   |
| C15 C16 C17 Si1 | -176.9(5) | C68 C63 C64 C65 | -0.3(9)   |
| C15 C16 C17 C18 | 1.8(10)   | C69 O11 C61 C46 | 25.5(6)   |
| C16 C17 C18 C19 | -2.1(10)  | C69 O11 C61 C60 | 146.4(6)  |
| C17 Si1 O1 C5   | 61.7(6)   | C69 C45 C46 O8  | 153.8(5)  |
| C17 Si1 C4 C3   | 148.5(6)  | C69 C45 C46 C61 | 32.7(6)   |
| C17 Si1 C4 C34  | -32.7(6)  | C69 C45 C62 C63 | -35.3(8)  |
| C17 Si1 C35 C36 | 166.4(5)  | C70 C40 C41 C42 | 1.5(11)   |
| C17 Si1 C35 C37 | 46.6(6)   | C71 C43 C44 O12 | -19.2(9)  |
| C17 Si1 C35 C38 | -71.9(6)  | C71 C43 C44 N3  | 161.0(6)  |
| C17 C18 C19 C14 | -0.2(11)  | C72 C49 C50 C51 | -2.2(11)  |
| C19 C14 C15 C16 | -3.1(11)  | C74 Si2 O9 C48  | 156.2(5)  |
| C20 C21 C22 O4  | -175.6(5) | C74 Si2 C49 C50 | 131.7(6)  |
| C20 C21 C22 C7  | -57.6(6)  | C74 Si2 C49 C72 | -55.4(7)  |
| C22 O4 C23 O6   | 175.3(6)  | C74 Si2 C56 C55 | 118.7(6)  |
| C22 O4 C23 C8   | -0.1(7)   | C74 Si2 C56 C57 | -62.5(8)  |

**Table 7. Hydrogen Atom Coordinates ( $\text{\AA} \times 10^4$ ) and Isotropic Displacement Parameters ( $\text{\AA}^2 \times 10^3$ ) for  $\beta$ -(S)-9a.**



| Atom | x        | y       | z       | U(eq) |
|------|----------|---------|---------|-------|
| H3   | 6470.04  | 3409.24 | 5169.34 | 36    |
| H7   | 3812.72  | 4163    | 4928.06 | 34    |
| H13  | 7254.86  | 2922.11 | 4666.73 | 34    |
| H14A | 7939.02  | 503.6   | 4526.58 | 35    |
| H1   | 6562.72  | 5851.67 | 6599.4  | 27    |
| H3B  | 2918.23  | 1698.92 | 4268.76 | 26    |
| H1A  | 1290.12  | 7954.76 | 4153.46 | 41    |
| H79  | 1588.26  | 6692.9  | 3812.55 | 43    |
| H3A  | 3088.33  | 6005.76 | 3864.81 | 40    |
| H5A  | 4218.77  | 6048.35 | 5086.17 | 27    |
| H5B  | 5245.97  | 6557.36 | 5084.34 | 27    |
| H6   | 6136.07  | 5327.68 | 5224.2  | 22    |
| H7A  | 6389.75  | 4801.67 | 5791.9  | 22    |
| H10  | 7737.68  | 6713.15 | 6605.16 | 32    |
| H11  | 9100.48  | 7402.77 | 6864.97 | 34    |
| H13A | 10784.41 | 7442.46 | 7067.04 | 56    |
| H13B | 11480.96 | 6772.6  | 6855.17 | 56    |
| H13C | 11083.44 | 6588.22 | 7282.1  | 56    |
| H14  | 7810.4   | 8932.86 | 4451.03 | 36    |
| H15  | 8001.19  | 7638.91 | 4766.37 | 36    |
| H16  | 6835.47  | 6585.35 | 4677.28 | 33    |
| H18  | 5382.43  | 8048.97 | 3913.02 | 33    |
| H19  | 6539.8   | 9104.01 | 4006.26 | 35    |
| H20  | 5306.47  | 4301.41 | 4897.83 | 23    |
| H21  | 4934.13  | 3222.7  | 5391.97 | 26    |
| H22  | 4417.53  | 4192.17 | 5862.39 | 23    |
| H24  | 10691.87 | 5279.03 | 6799.62 | 44    |
| H25  | 9334.29  | 4576.41 | 6544.59 | 42    |
| H26A | 4243.73  | 5047.71 | 6412.59 | 33    |
| H26B | 4841.59  | 5072.86 | 6809.66 | 33    |
| H28  | 3880.7   | 6348.05 | 6078.93 | 38    |
| H29  | 3677.05  | 7805.18 | 6109.12 | 46    |
| H30  | 4410.25  | 8569.36 | 6596.26 | 52    |
| H31  | 5391.14  | 7886.3  | 7056.78 | 53    |
| H32  | 5513.37  | 6409.2  | 7054.22 | 41    |
| H33  | 2594.86  | 8547.74 | 4503.93 | 39    |
| H34  | 4113.54  | 7894.37 | 4541.11 | 39    |
| H36A | 4793.81  | 4526.81 | 4134.52 | 51    |
| H36B | 4976.54  | 4370.08 | 3683.6  | 51    |

**Table 7. Hydrogen Atom Coordinates ( $\text{\AA}\times 10^4$ ) and Isotropic Displacement Parameters ( $\text{\AA}^2\times 10^3$ ) for  $\beta$ -(*S*)-9a.**

|      |         |          |         |    |
|------|---------|----------|---------|----|
| H36C | 4044.35 | 4909.06  | 3823.22 | 51 |
| H37A | 6851.51 | 5849.96  | 3893.8  | 50 |
| H37B | 6640.49 | 4958.32  | 3695.38 | 50 |
| H37C | 6538.41 | 5060.63  | 4153.42 | 50 |
| H38A | 4533.8  | 6152.34  | 3420.09 | 56 |
| H38B | 5405.24 | 5577.13  | 3253.48 | 56 |
| H38C | 5650.25 | 6480.98  | 3433.44 | 56 |
| H39A | 159.76  | 4414.07  | 3377.98 | 60 |
| H39B | 356.88  | 5206.31  | 3652.73 | 60 |
| H39C | -388.03 | 4480.74  | 3786.35 | 60 |
| H41  | 952.27  | 3057.49  | 3517.47 | 33 |
| H42  | 2226.88 | 2331.43  | 3825.96 | 30 |
| H46  | 5202.88 | 2213.93  | 4380.22 | 24 |
| H47  | 6318.76 | 2061.05  | 3952.54 | 26 |
| H48A | 7039.8  | 435.83   | 3735.04 | 31 |
| H48B | 6141.99 | 849.2    | 3499.15 | 31 |
| H50  | 5501.31 | 1097.14  | 2575.09 | 42 |
| H51  | 3808.72 | 1181.81  | 2595.59 | 54 |
| H52  | 3020.43 | 2135.43  | 3008.37 | 57 |
| H53  | 8109.21 | -878.17  | 2016.66 | 49 |
| H54  | 8248.36 | -1017.96 | 2684.29 | 45 |
| H55  | 7880.34 | 115.43   | 3085.18 | 39 |
| H57  | 7243.11 | 1544.96  | 2152.71 | 48 |
| H58  | 7608.2  | 411.32   | 1747.86 | 59 |
| H59  | 7778.14 | 1703.75  | 4269.47 | 26 |
| H60  | 7242.62 | 1662.36  | 4950.36 | 24 |
| H61  | 5860.69 | 810.36   | 4825.43 | 24 |
| H62A | 3006.8  | 536.45   | 4614.37 | 27 |
| H62B | 3895.23 | 295.53   | 4333.68 | 27 |
| H64  | 5313.95 | -497.36  | 4581.93 | 30 |
| H65  | 5879.51 | -1454.86 | 5045.08 | 35 |
| H66  | 5045.24 | -1623.78 | 5620.38 | 40 |
| H67  | 3631.55 | -820.83  | 5747.25 | 37 |
| H68  | 3077.31 | 150.79   | 5286.74 | 32 |
| H70  | 1470.02 | 5069.23  | 4202.5  | 34 |
| H71  | 2719.33 | 4353.49  | 4508.22 | 28 |
| H72  | 5689.91 | 2955.4   | 3366.48 | 46 |

**Table 7. Hydrogen Atom Coordinates ( $\text{\AA}\times 10^4$ ) and Isotropic Displacement Parameters ( $\text{\AA}^2\times 10^3$ ) for  $\beta$ -(*S*)-9a.**

|      |         |         |         |    |
|------|---------|---------|---------|----|
| H73  | 3978.54 | 2995.55 | 3417.67 | 58 |
| H75A | 9160.76 | 2245.16 | 3234.66 | 68 |
| H75B | 9461.12 | 3005.67 | 2955.37 | 68 |
| H75C | 9189.57 | 2105.78 | 2777.07 | 68 |
| H76A | 7101.69 | 3665.45 | 3249.54 | 67 |
| H76B | 8260.69 | 3849.07 | 3281.32 | 67 |
| H76C | 7772.76 | 3116.21 | 3534.46 | 67 |
| H77A | 7965.29 | 2849.34 | 2352    | 64 |
| H77B | 8103.83 | 3748.07 | 2553.43 | 64 |
| H77C | 7035.14 | 3319.64 | 2538.21 | 64 |
| H78A | 6428.68 | 3470.7  | 7553.46 | 71 |
| H78B | 6874.41 | 4260.69 | 7324.61 | 71 |

## 7. Copies of NMR spectra

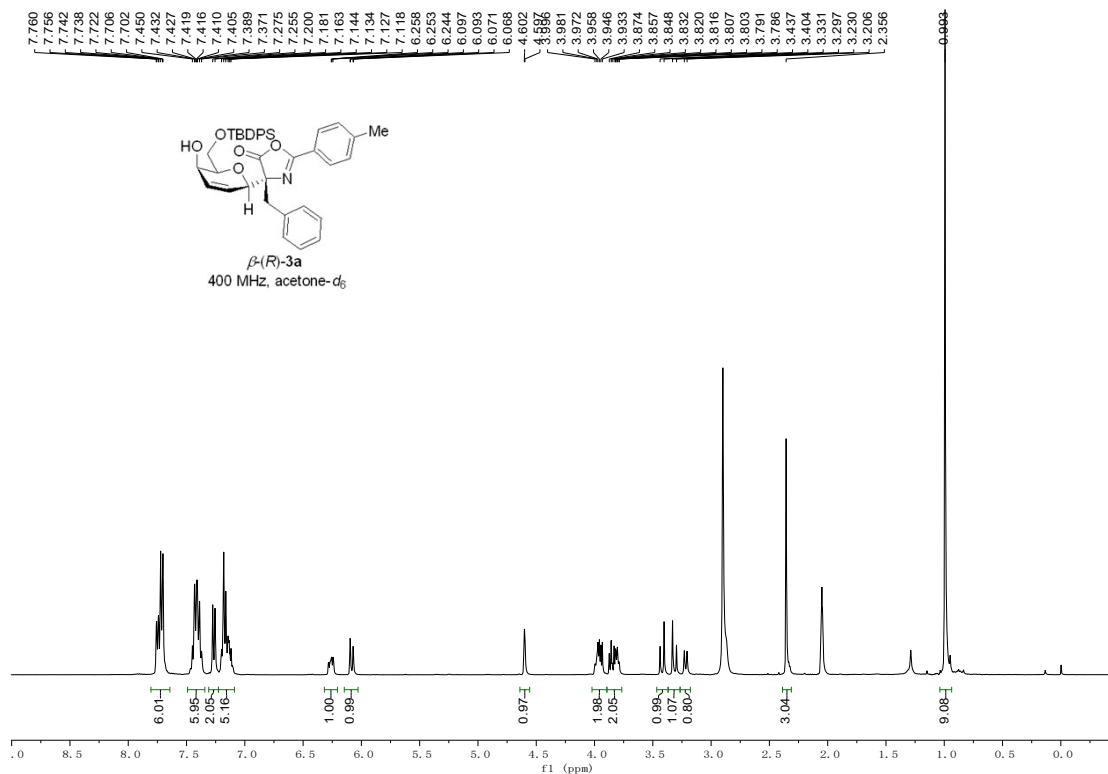

Figure S2.  $^1\text{H}$  NMR spectrum of  $\beta$ -(R)-3a

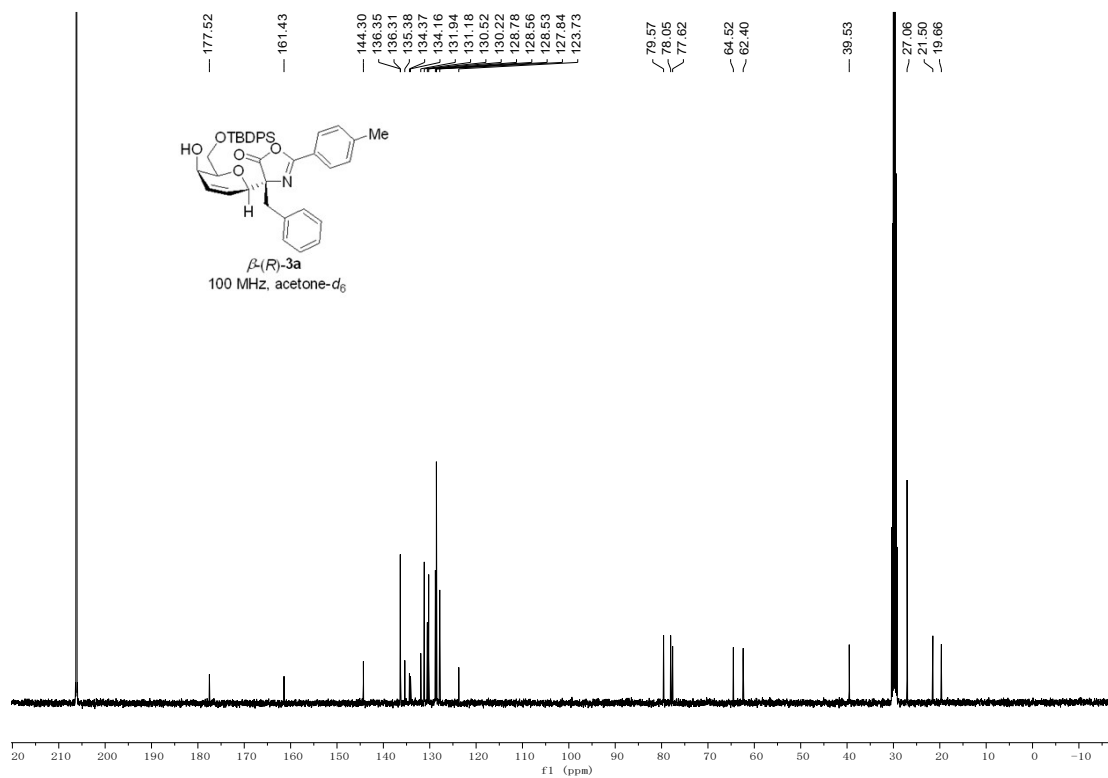

Figure S3.  $^{13}\text{C}$  NMR spectrum of  $\beta$ -(R)-3a

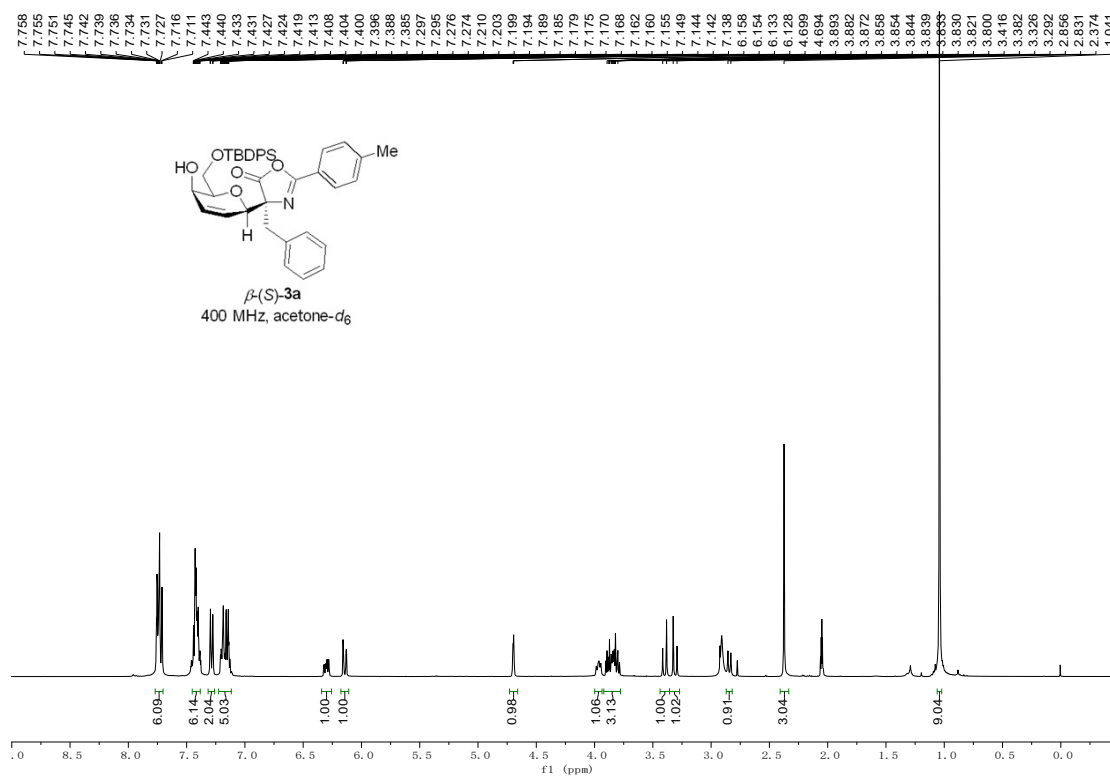

Figure S4.  $^1\text{H}$  NMR spectrum of  $\beta$ -(S)-3a

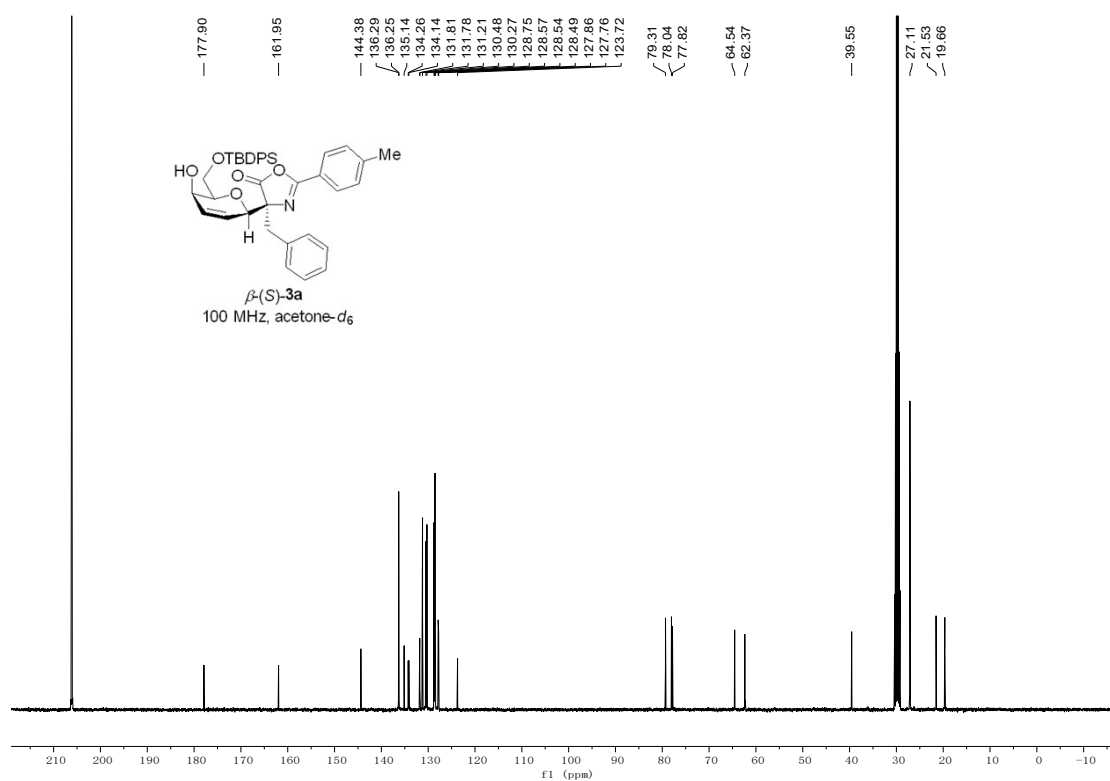

Figure S5.  $^{13}\text{C}$  NMR spectrum of  $\beta$ -(S)-3a

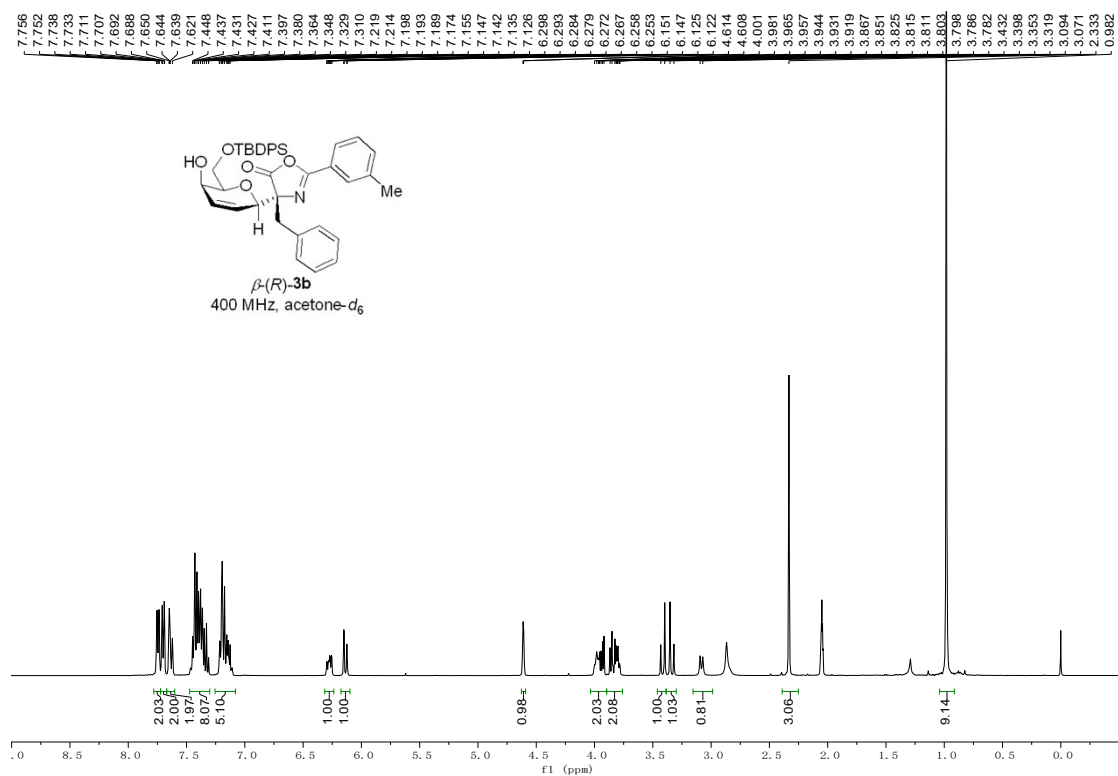

Figure S6.  $^1\text{H}$  NMR spectrum of  $\beta$ -(R)-3b

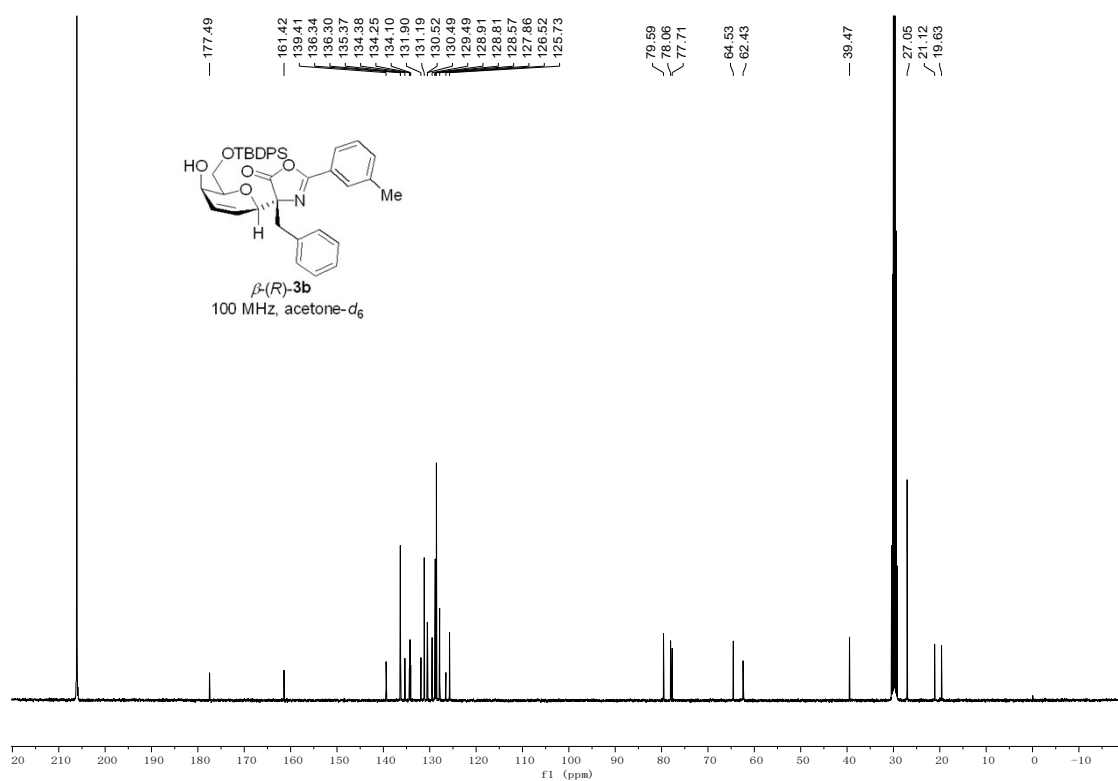

Figure S7.  $^{13}\text{C}$  NMR spectrum of  $\beta$ -(R)-3b

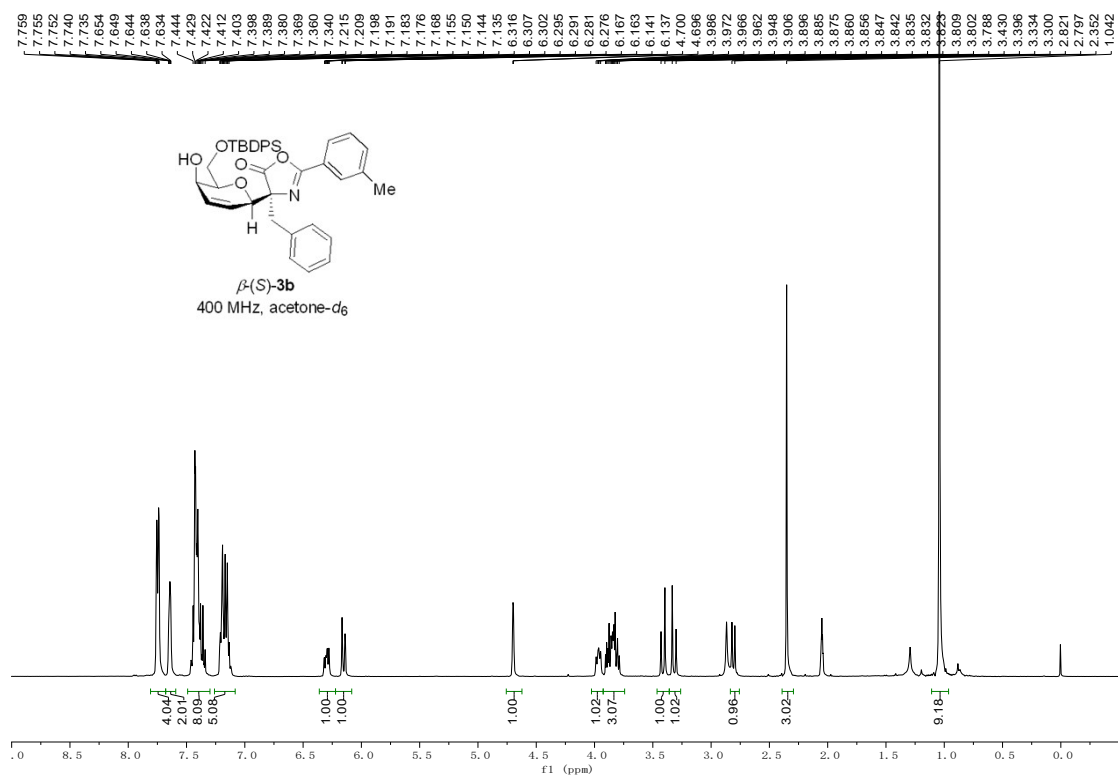

Figure S8.  $^1\text{H}$  NMR spectrum of  $\beta$ -(S)-3b

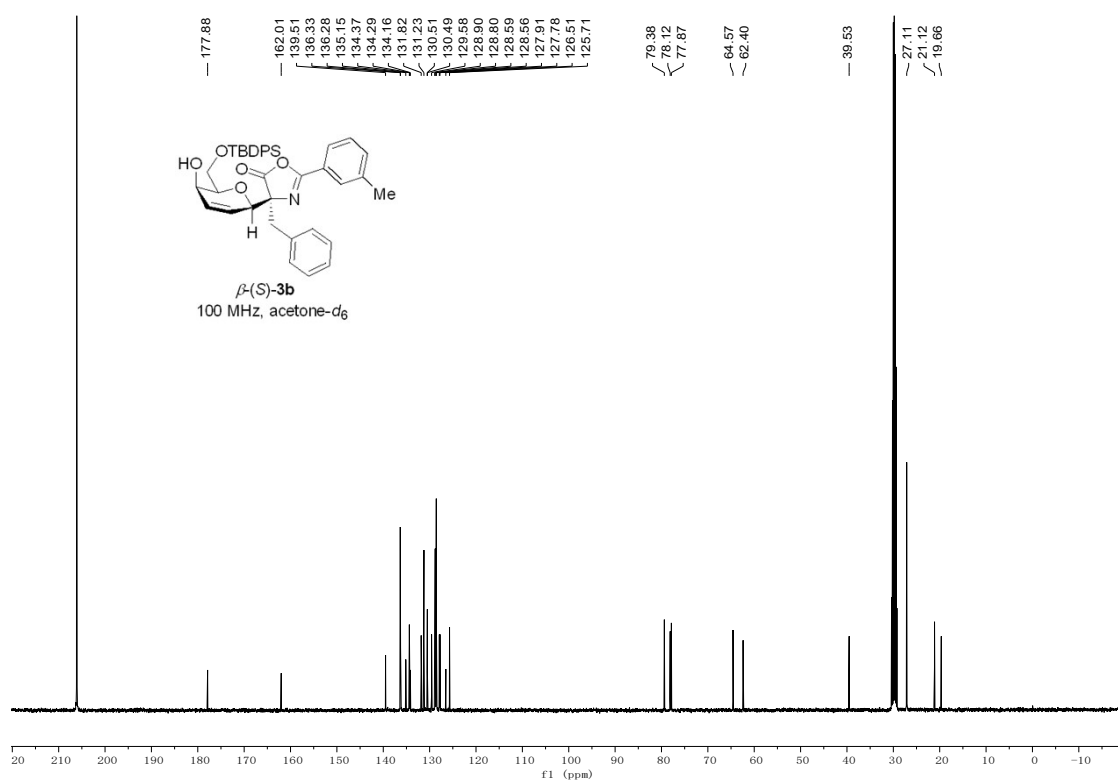

Figure S9.  $^{13}\text{C}$  NMR spectrum of  $\beta$ -(S)-3b

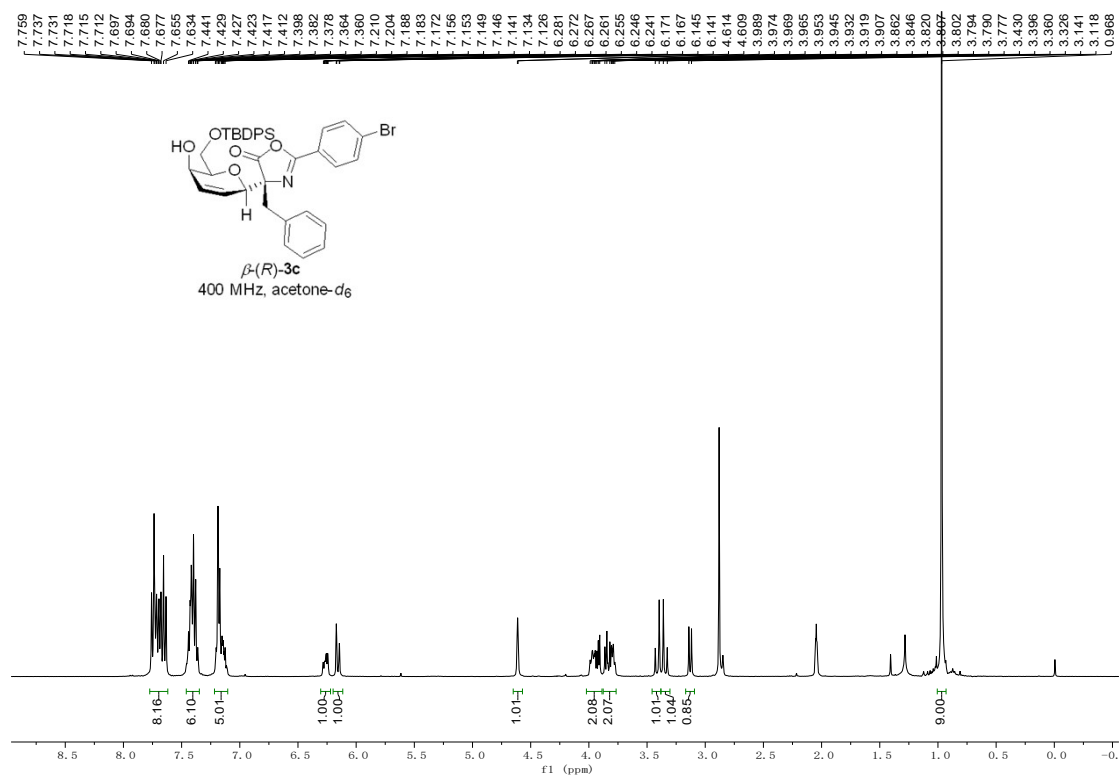

Figure S10.  $^1\text{H}$  NMR spectrum of  $\beta$ -(R)-3c

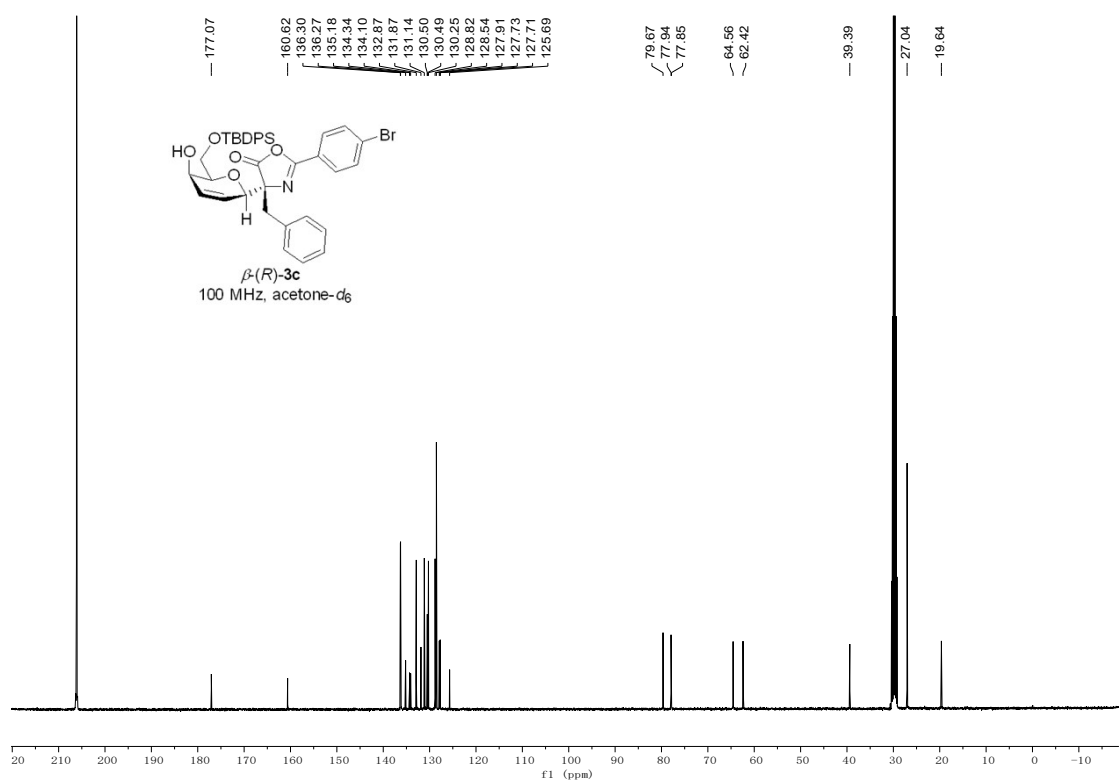

Figure S11.  $^{13}\text{C}$  NMR spectrum of  $\beta$ -(R)-3c



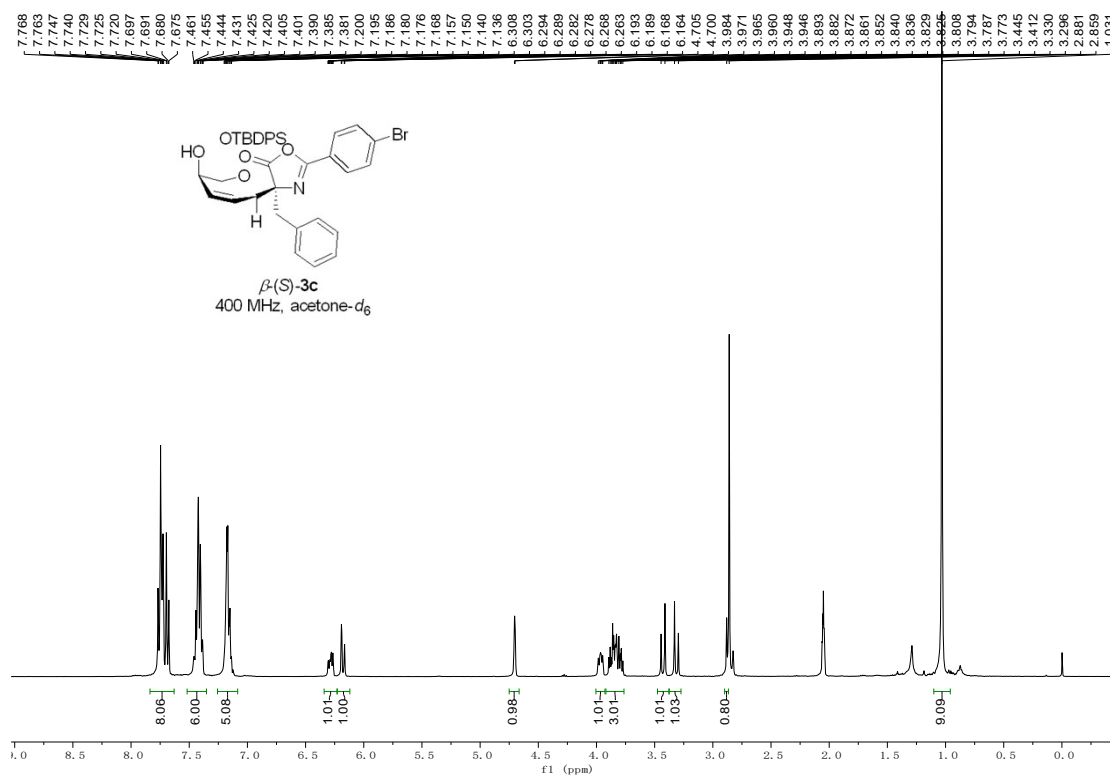

Figure S12.  $^1\text{H}$  NMR spectrum of  $\beta$ -(S)-**3c**

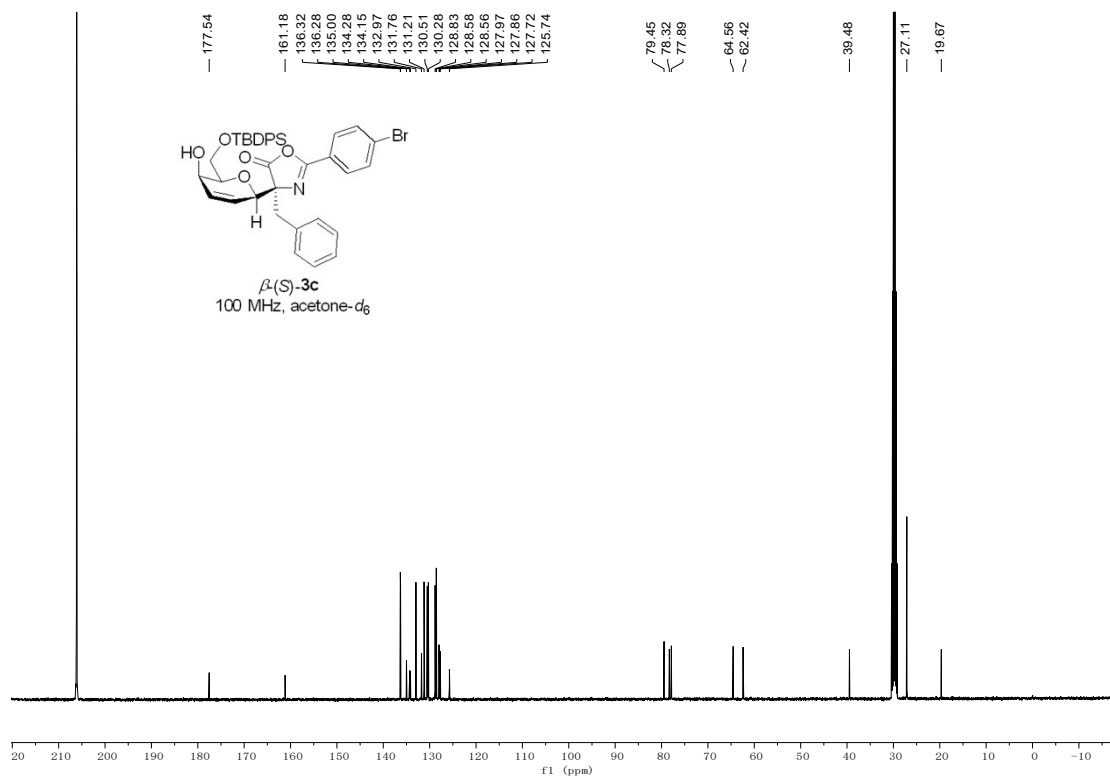

Figure S13.  $^{13}\text{C}$  NMR spectrum of  $\beta$ -(S)-**3c**

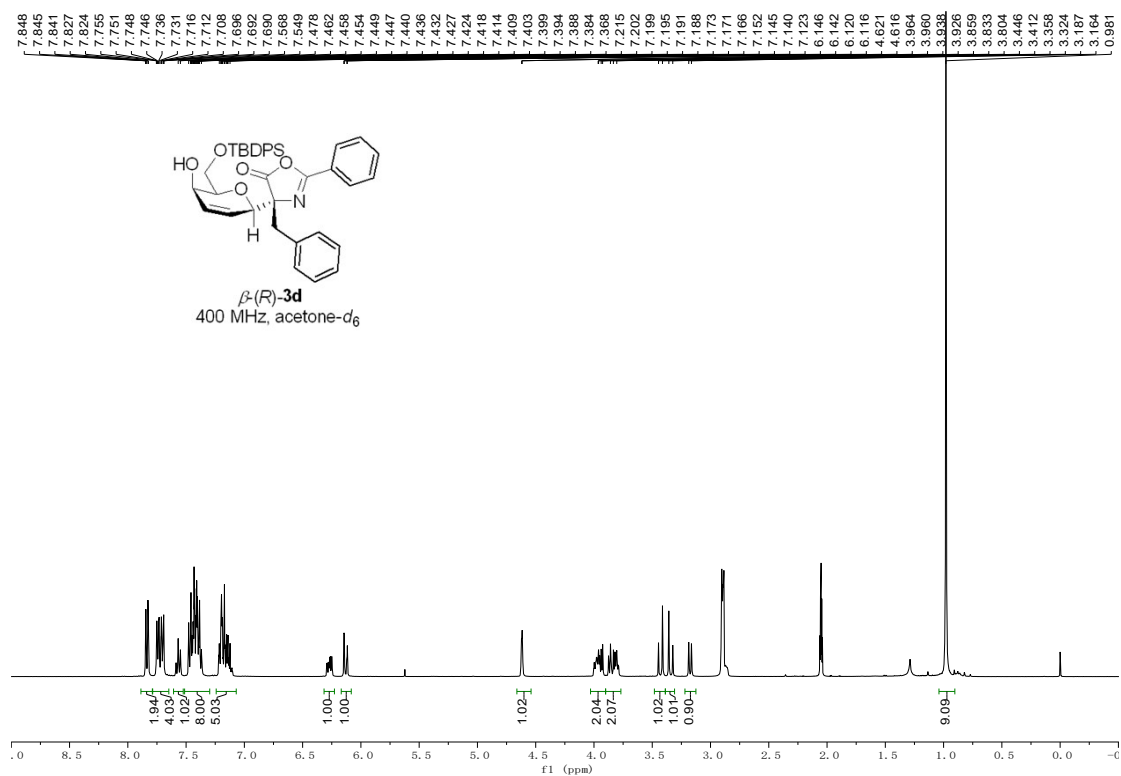

Figure S14.  $^1\text{H}$  NMR spectrum of  $\beta$ -(R)-3d

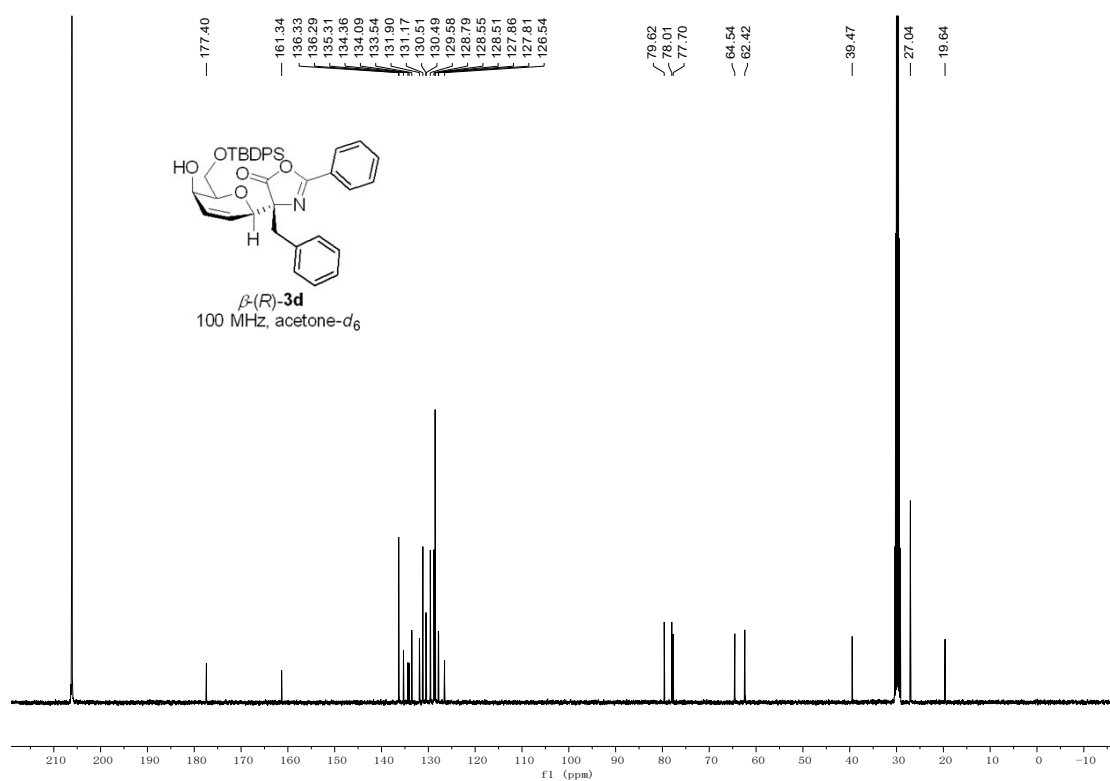

Figure S15.  $^{13}\text{C}$  NMR spectrum of  $\beta$ -(R)-3d

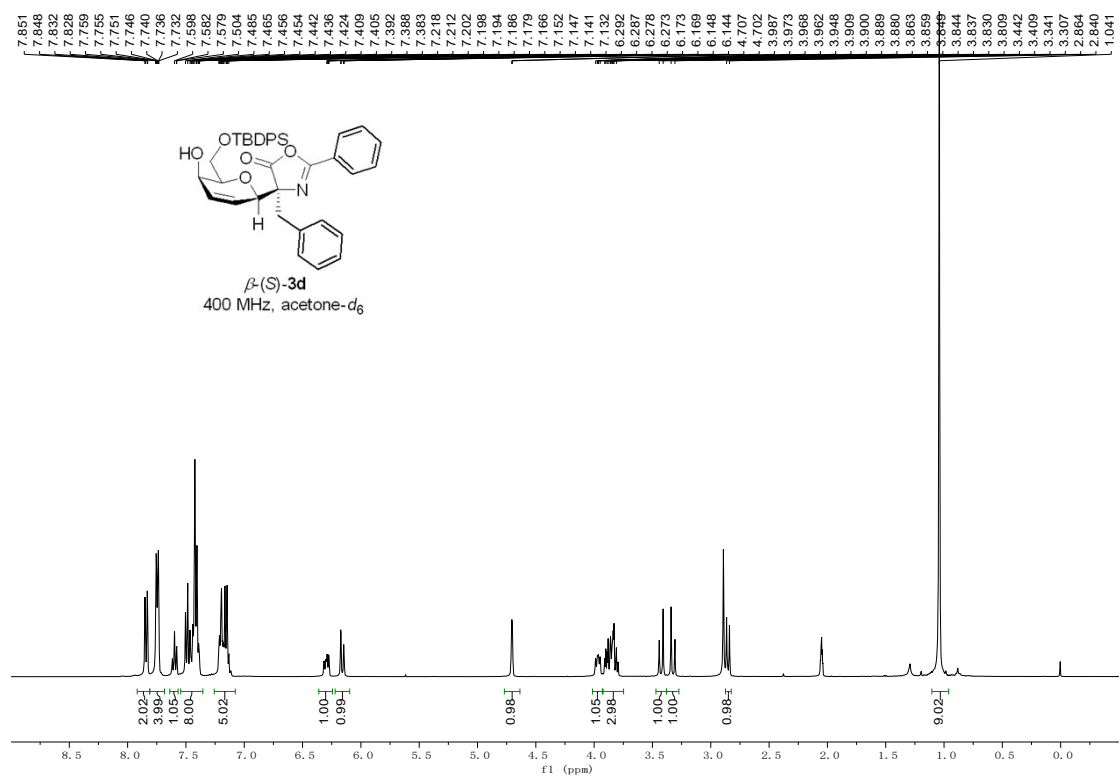

Figure S16.  $^1\text{H}$  NMR spectrum of  $\beta$ -(S)-3d

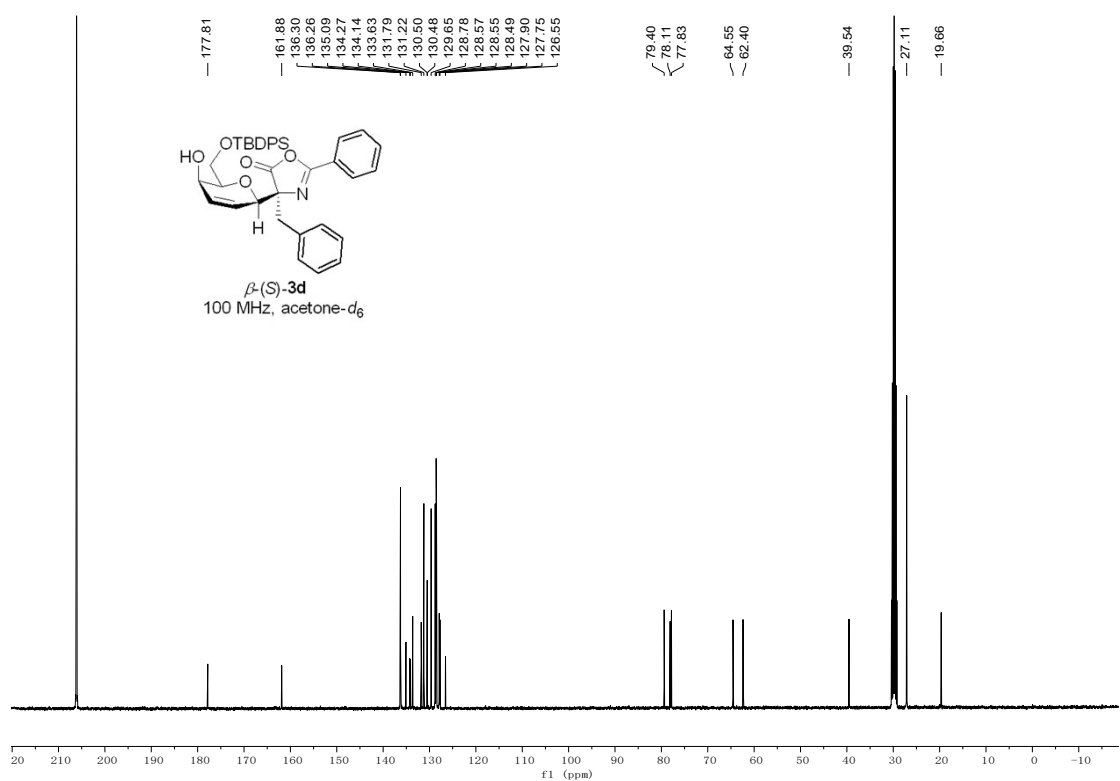

Figure S17.  $^{13}\text{C}$  NMR spectrum of  $\beta$ -(S)-3d

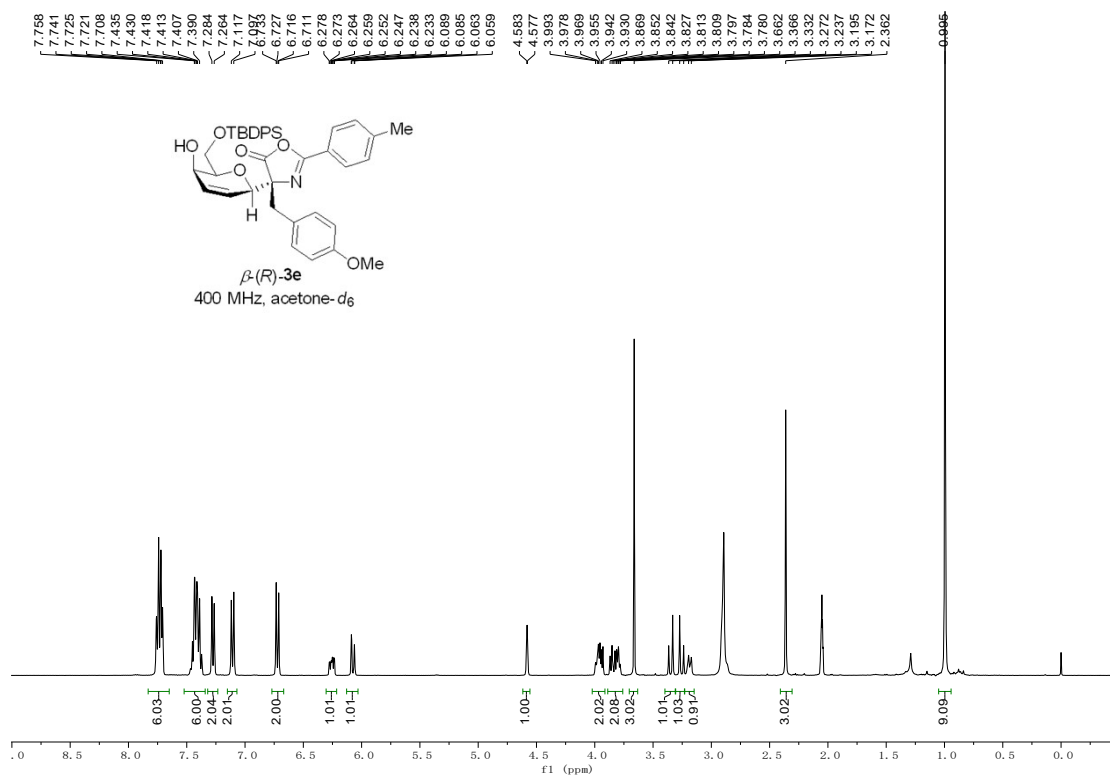

Figure S18.  $^1\text{H}$  NMR spectrum of  $\beta$ -(R)-3e

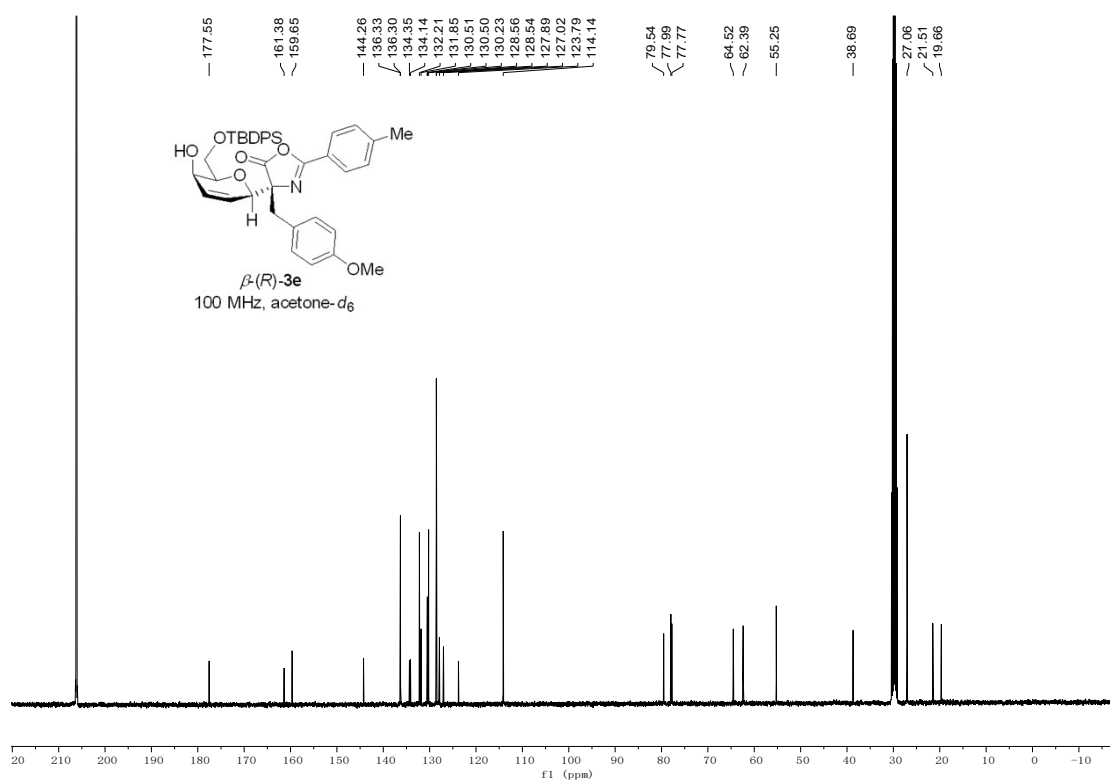

Figure S19.  $^{13}\text{C}$  NMR spectrum of  $\beta$ -(R)-3e

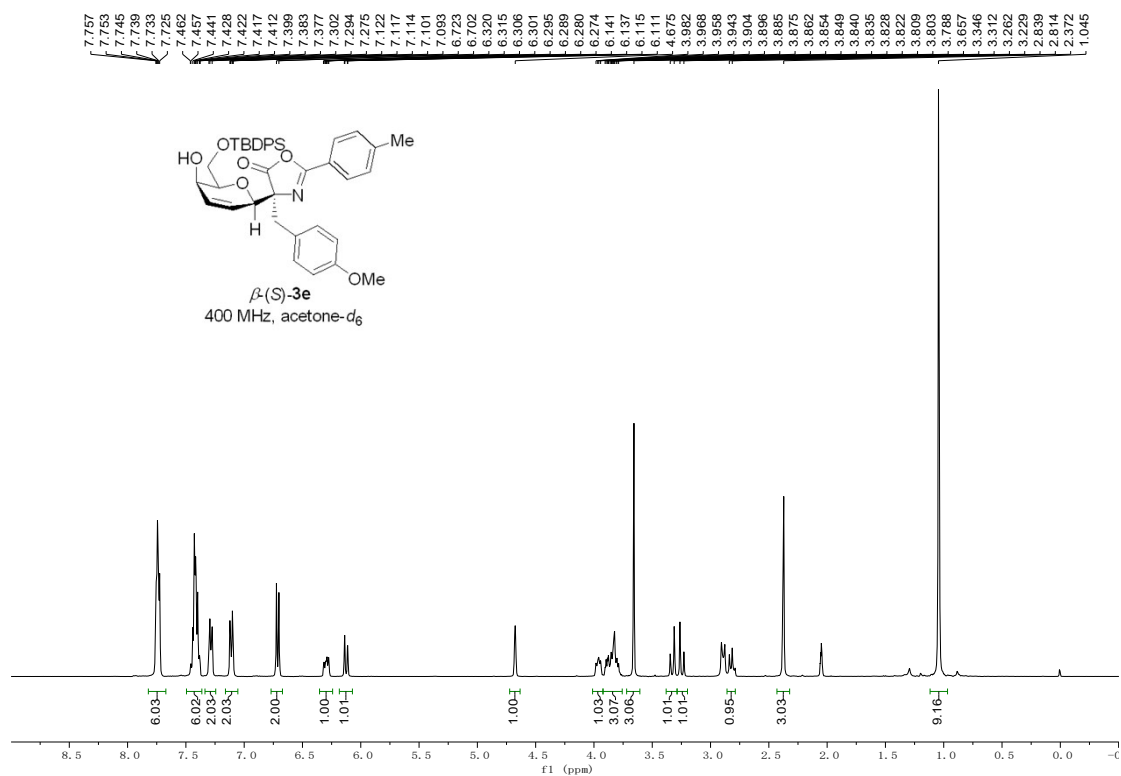

Figure S20.  $^1\text{H}$  NMR spectrum of  $\beta$ -(S)-3e

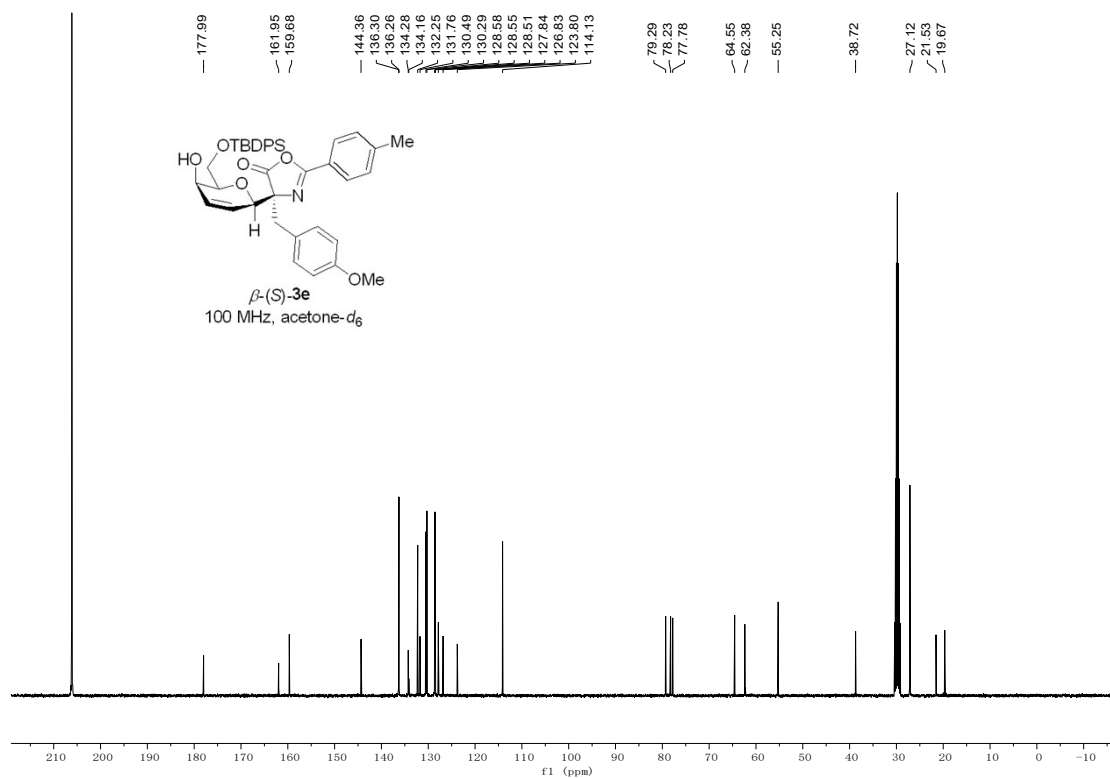

Figure S21.  $^{13}\text{C}$  NMR spectrum of  $\beta$ -(S)-3e

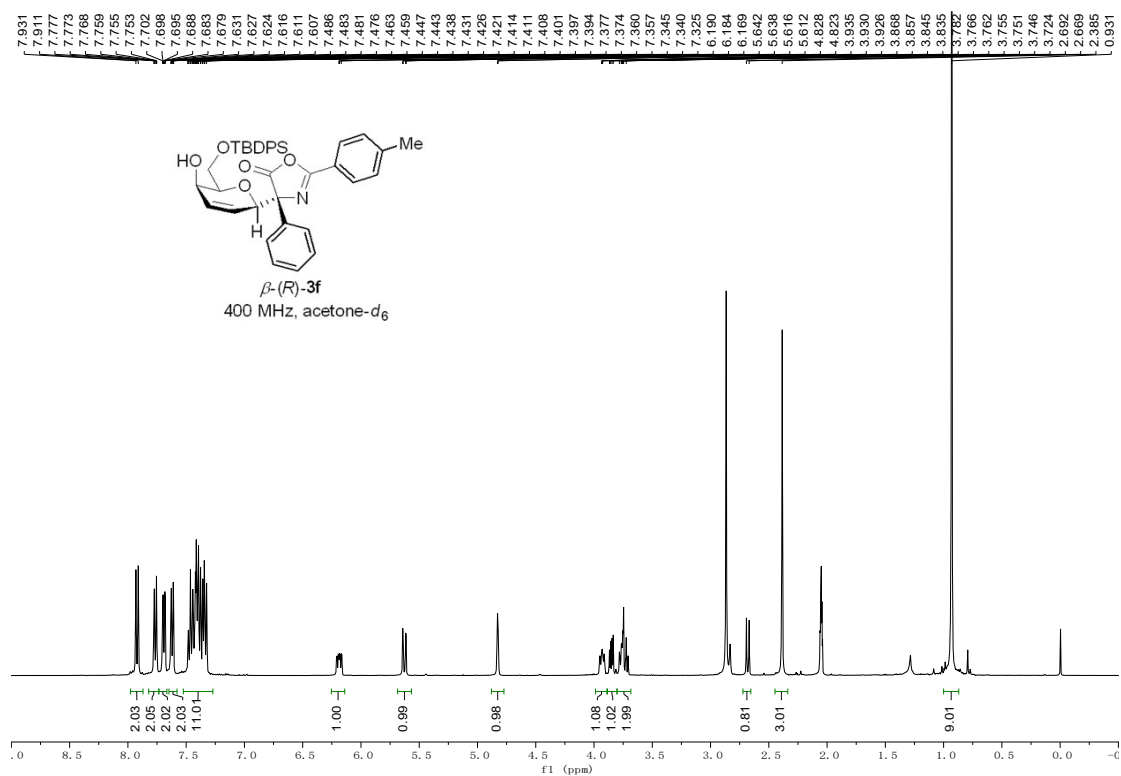

Figure S22.  $^1\text{H}$  NMR spectrum of  $\beta$ -(R)-3f

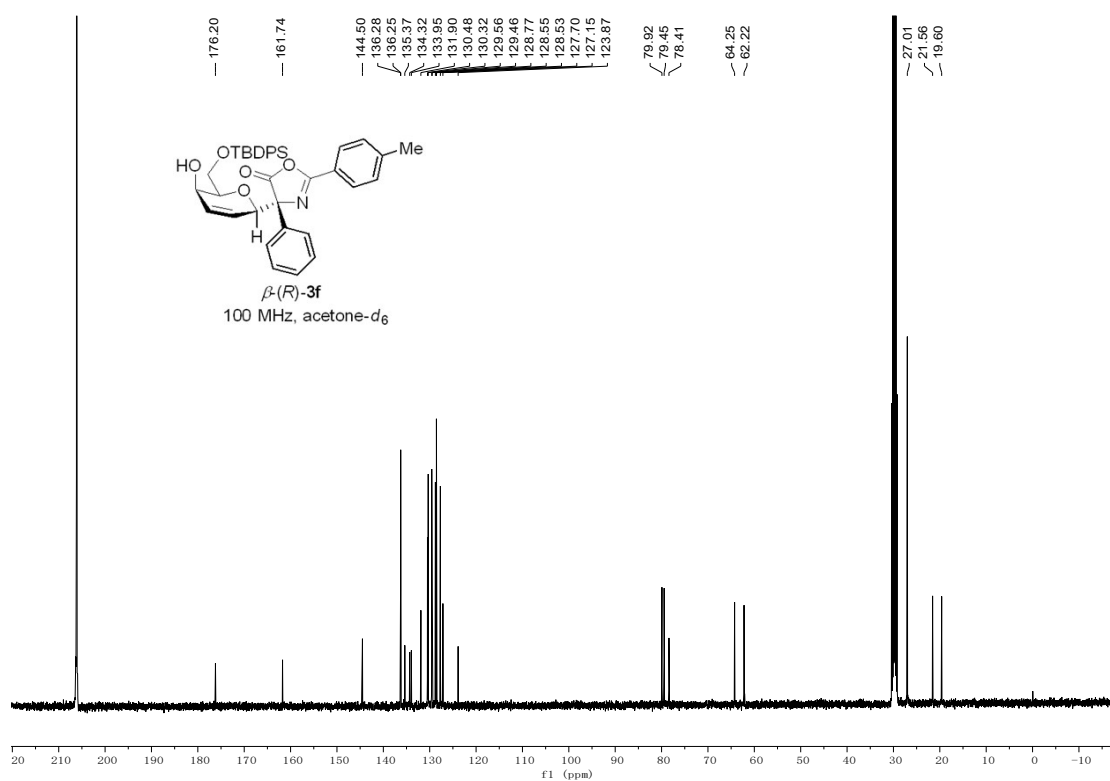

Figure S23.  $^{13}\text{C}$  NMR spectrum of  $\beta$ -(R)-3f

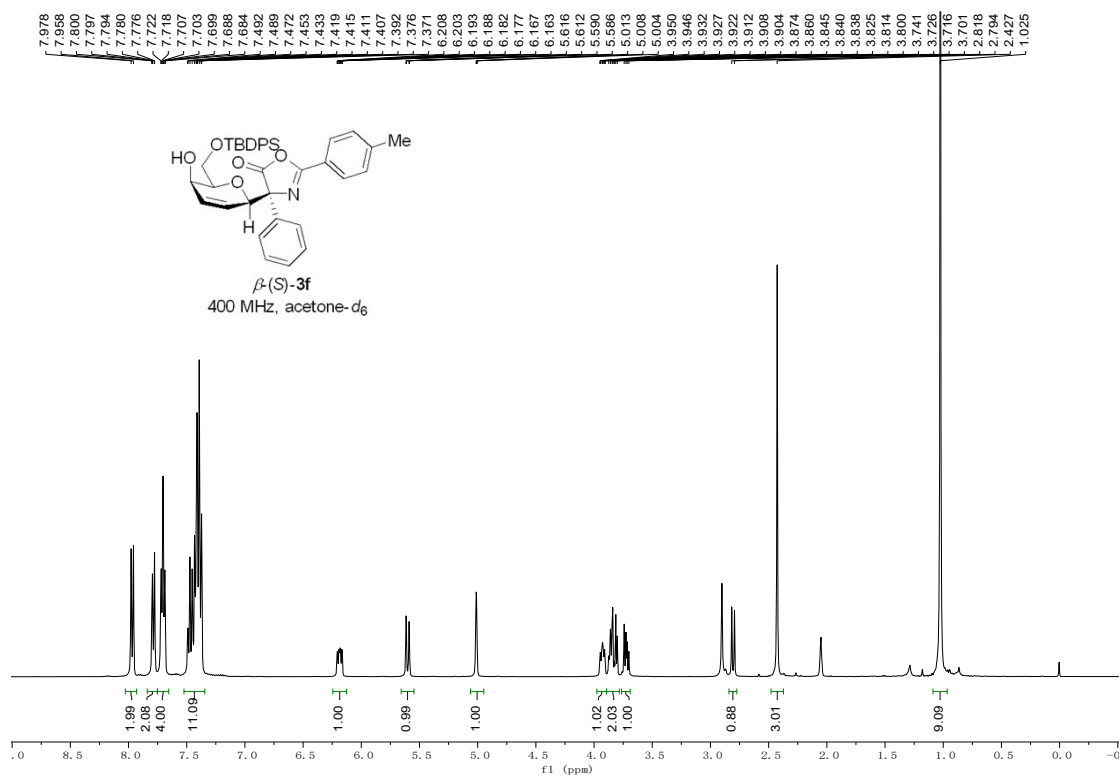

Figure S24.  $^1\text{H}$  NMR spectrum of  $\beta$ -(S)-3f

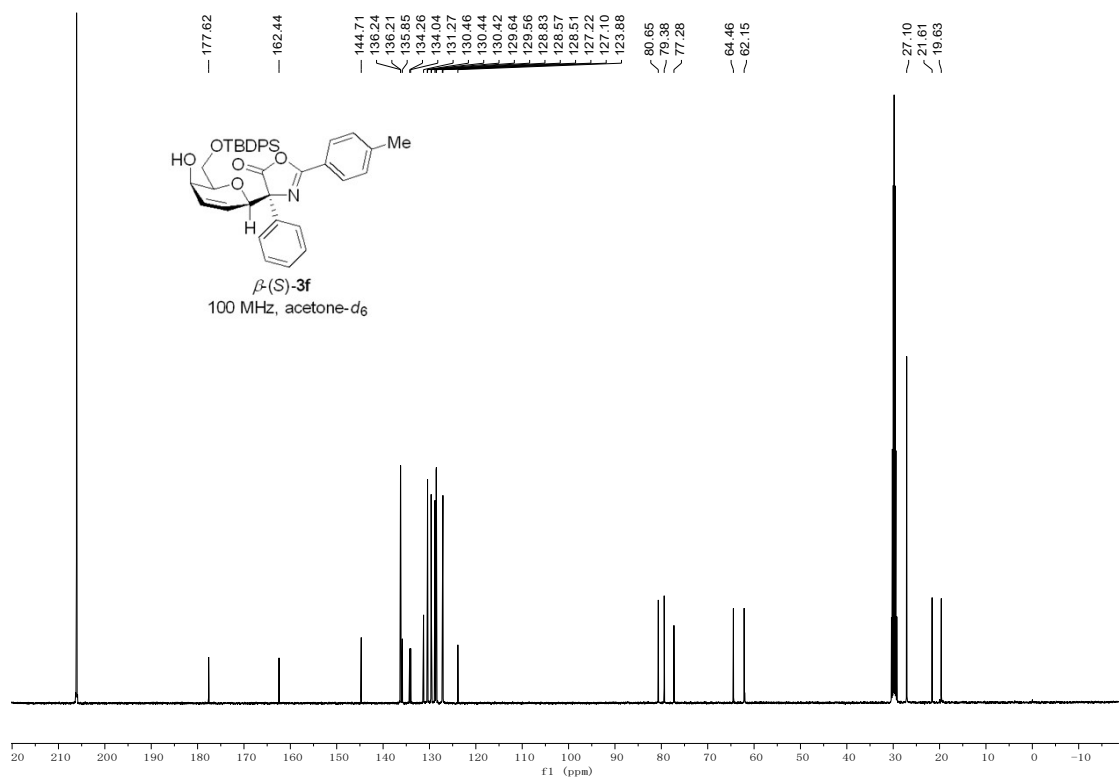

Figure S25.  $^{13}\text{C}$  NMR spectrum of  $\beta$ -(S)-3f

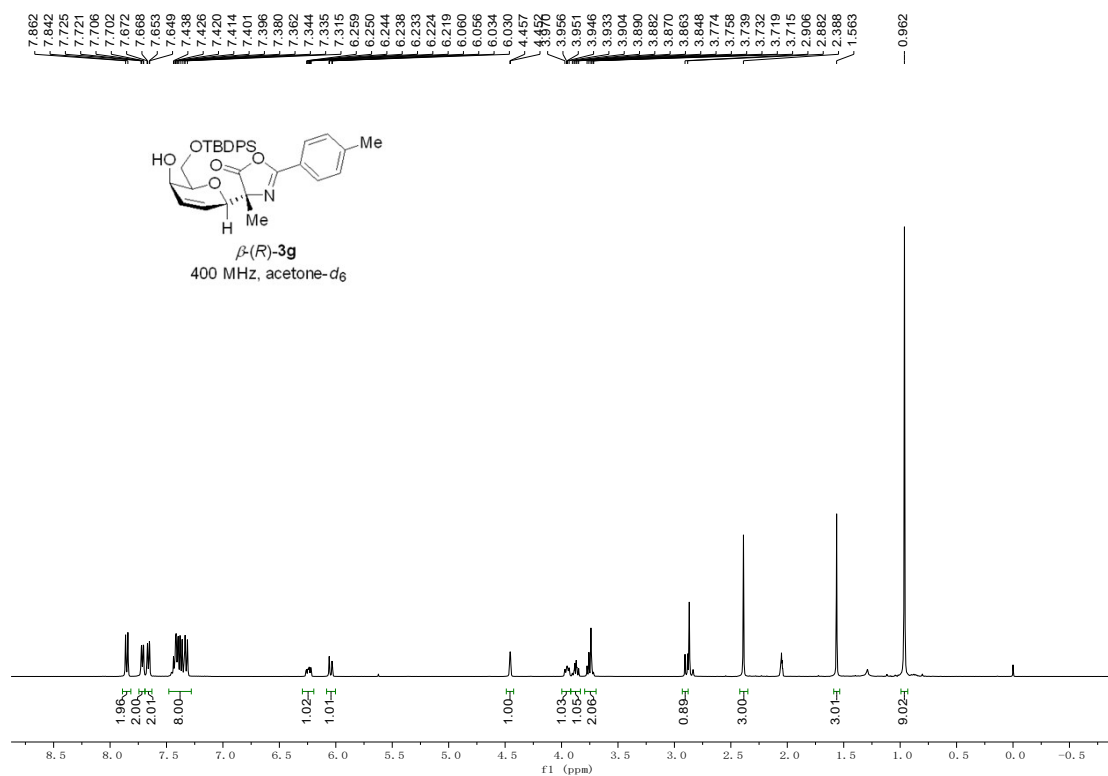

Figure S26.  $^1\text{H}$  NMR spectrum of  $\beta$ -(R)-3g

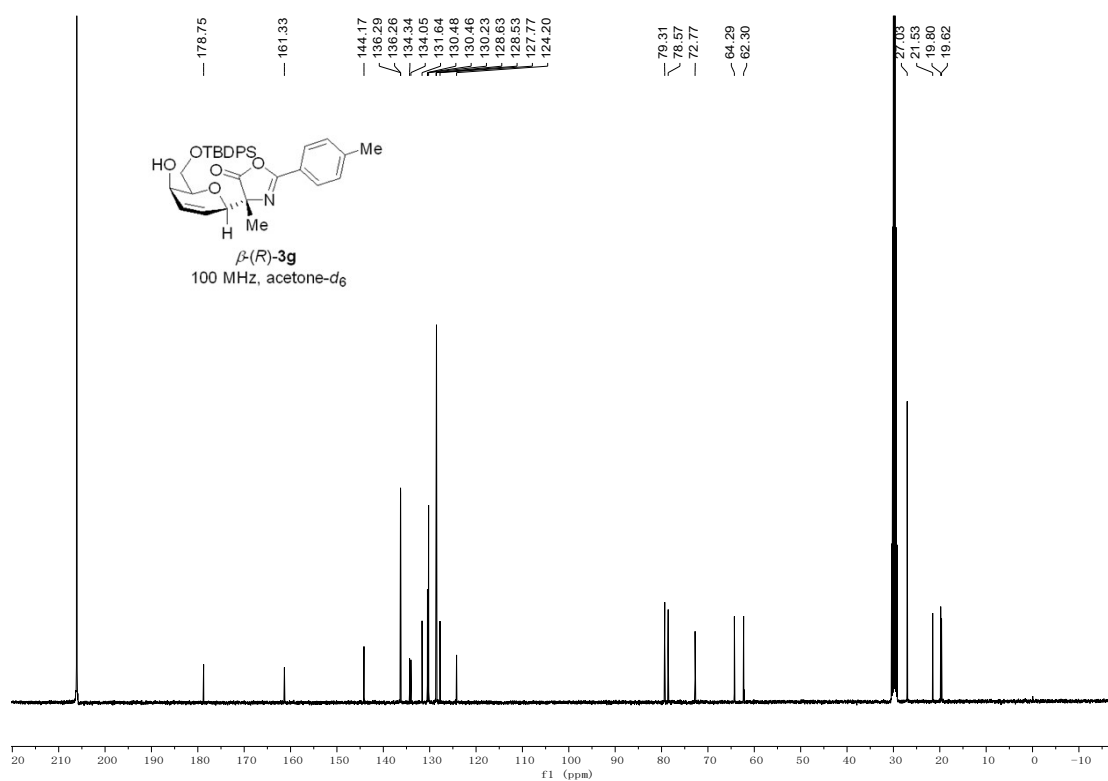

Figure S27.  $^{13}\text{C}$  NMR spectrum of  $\beta$ -(R)-3g





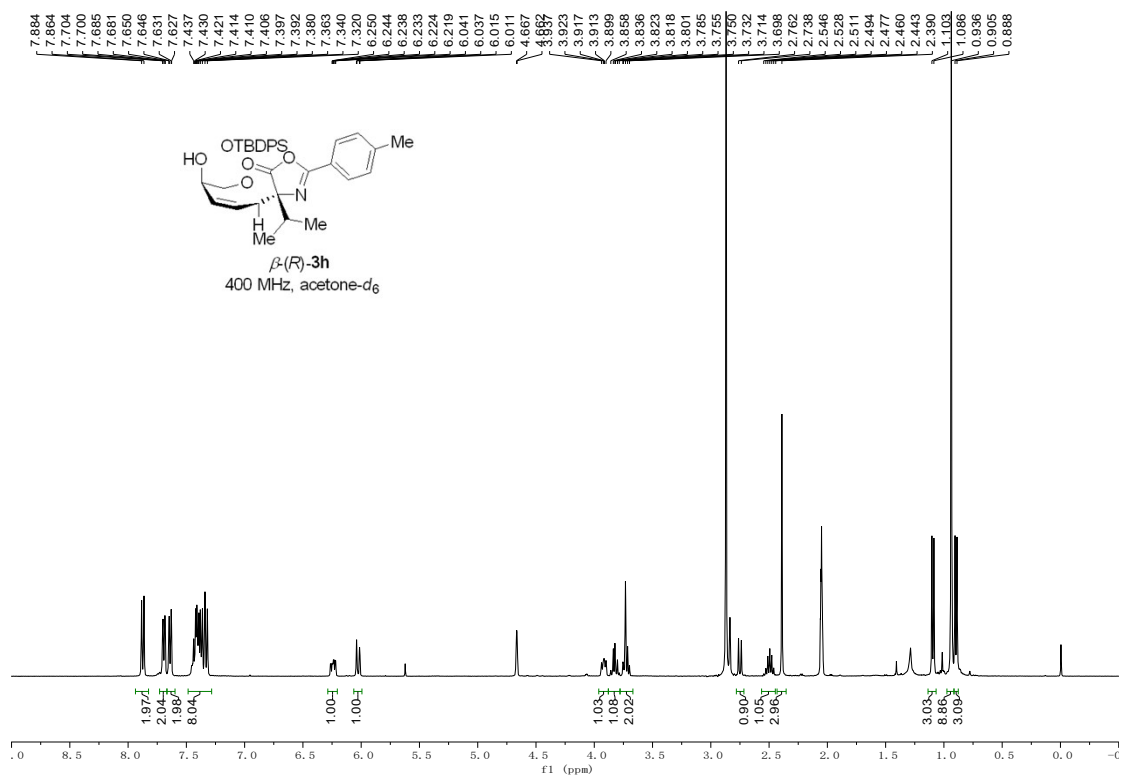

Figure S30.  $^1\text{H}$  NMR spectrum of  $\beta$ -(R)-3h

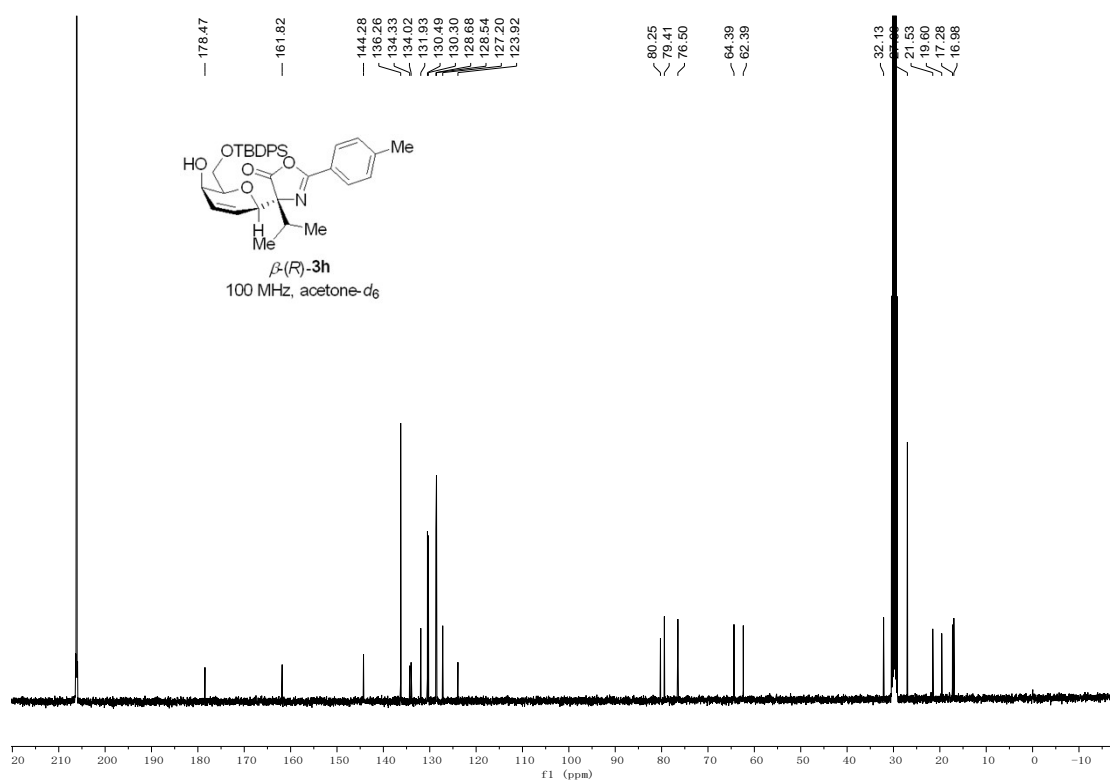

Figure S31.  $^{13}\text{C}$  NMR spectrum of  $\beta$ -(R)-3h

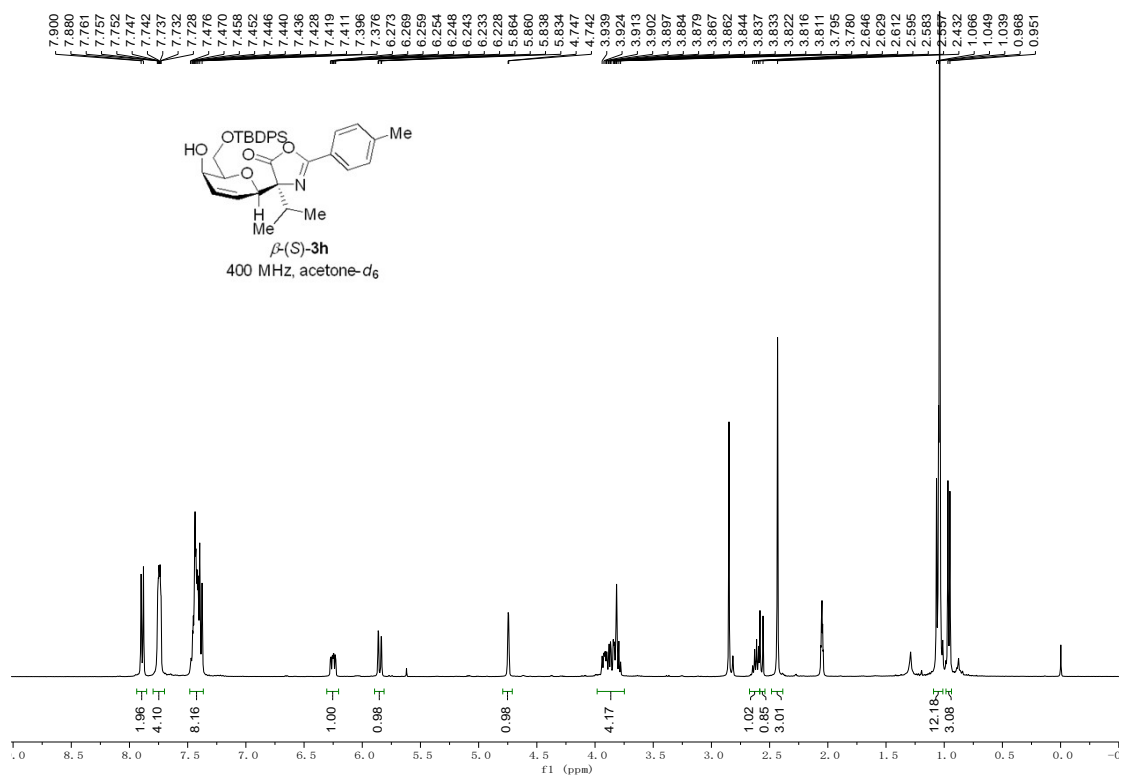

Figure S32.  $^1\text{H}$  NMR spectrum of  $\beta$ -(S)-3h

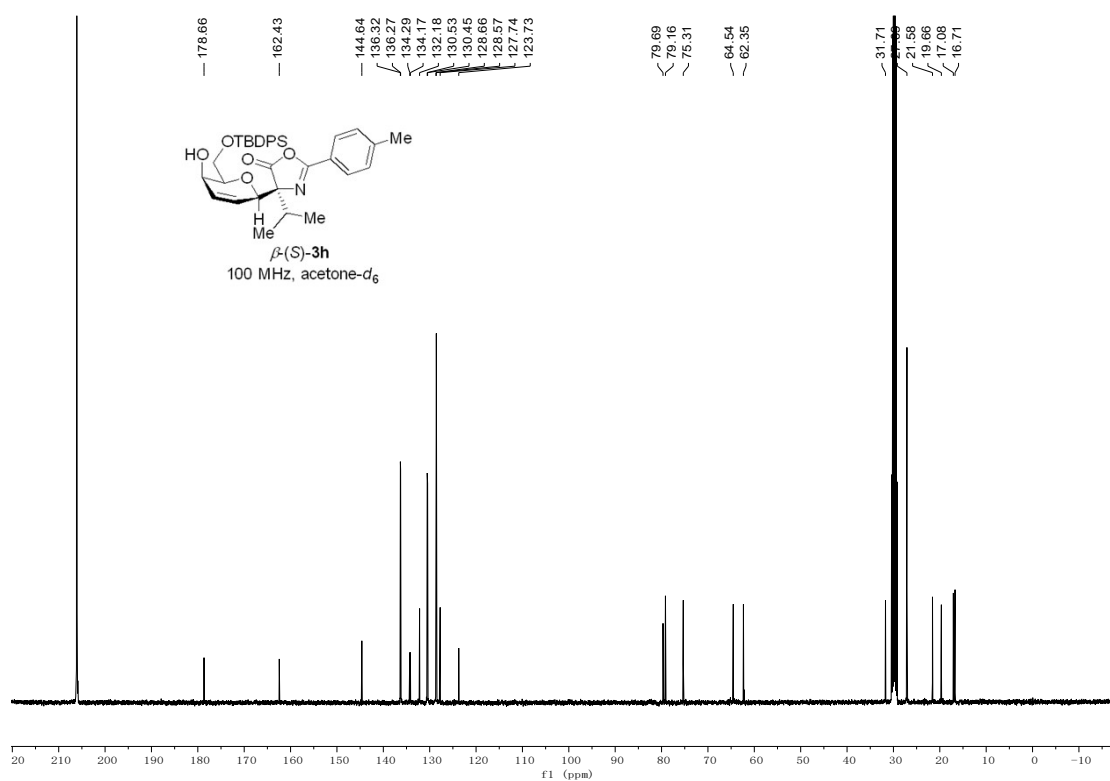

Figure S33.  $^{13}\text{C}$  NMR spectrum of  $\beta$ -(S)-3h

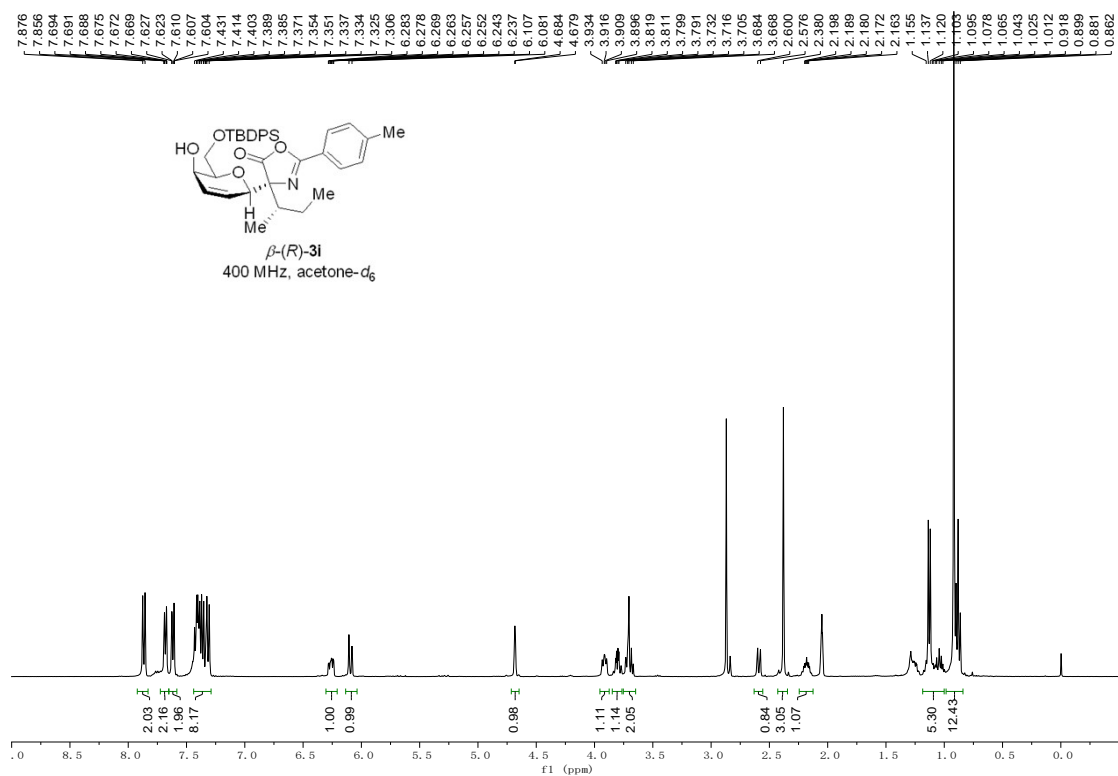

Figure S34.  $^1\text{H}$  NMR spectrum of  $\beta$ -(*R*)-3i

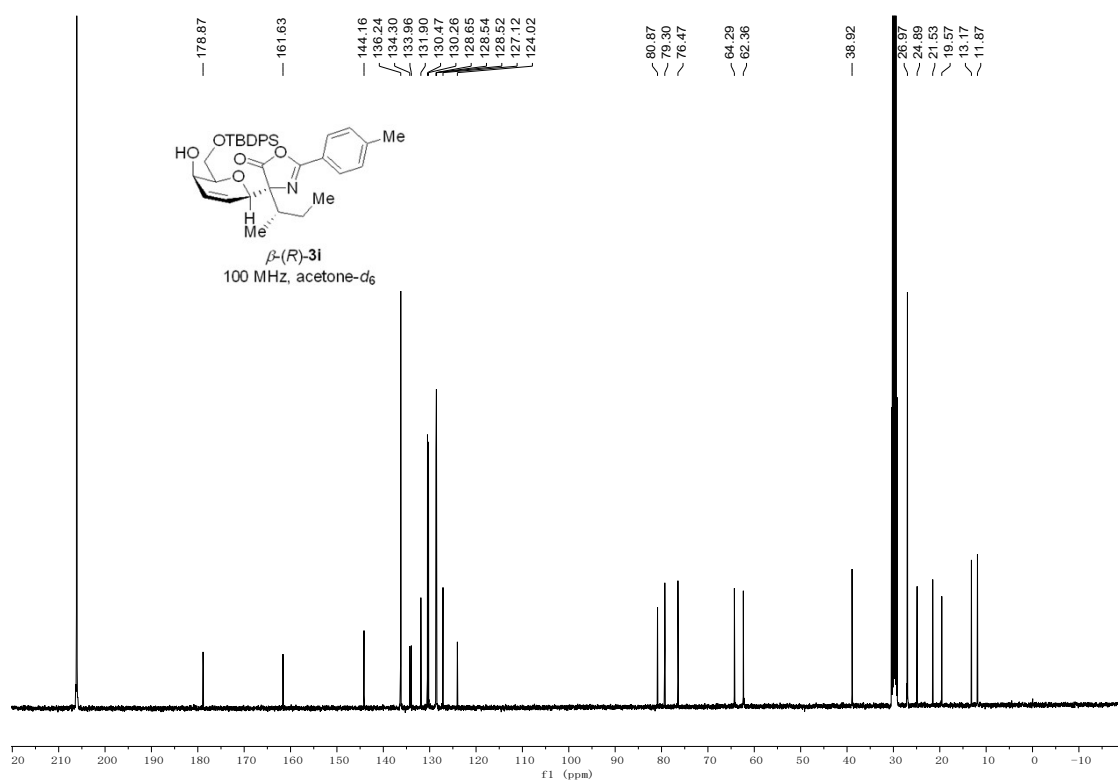

Figure S35.  $^{13}\text{C}$  NMR spectrum of  $\beta$ -(*R*)-3i

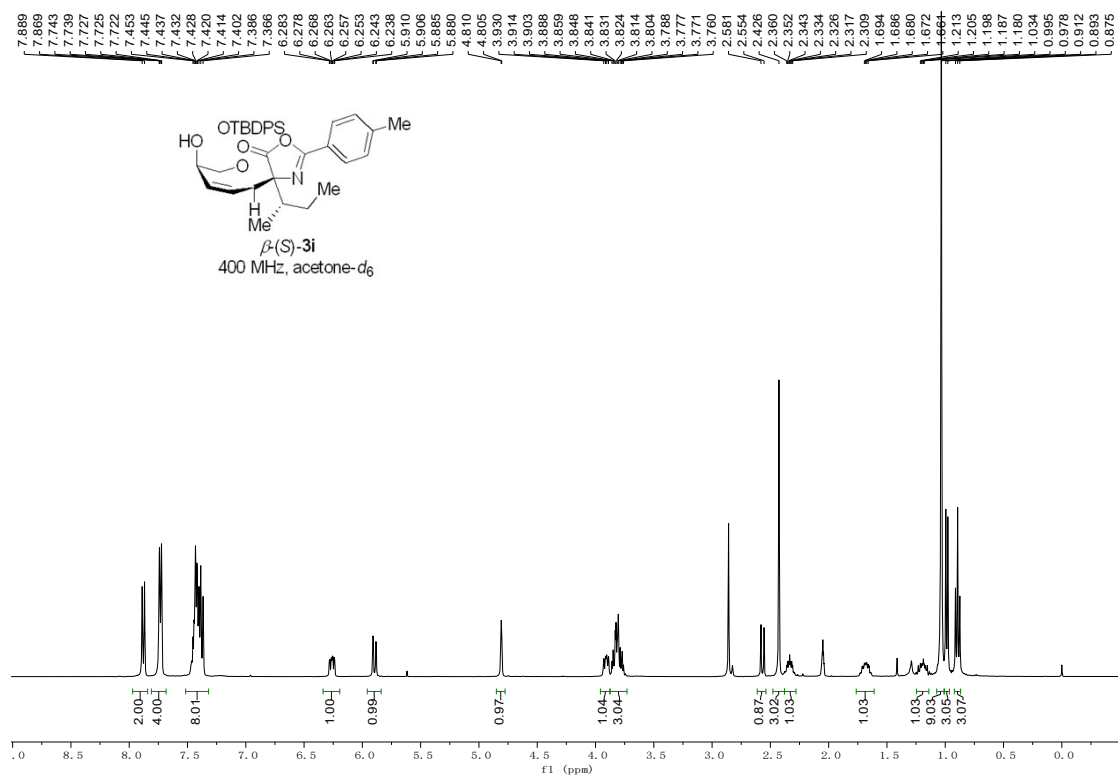

Figure S36.  $^1\text{H}$  NMR spectrum of  $\beta$ -(S)-3i

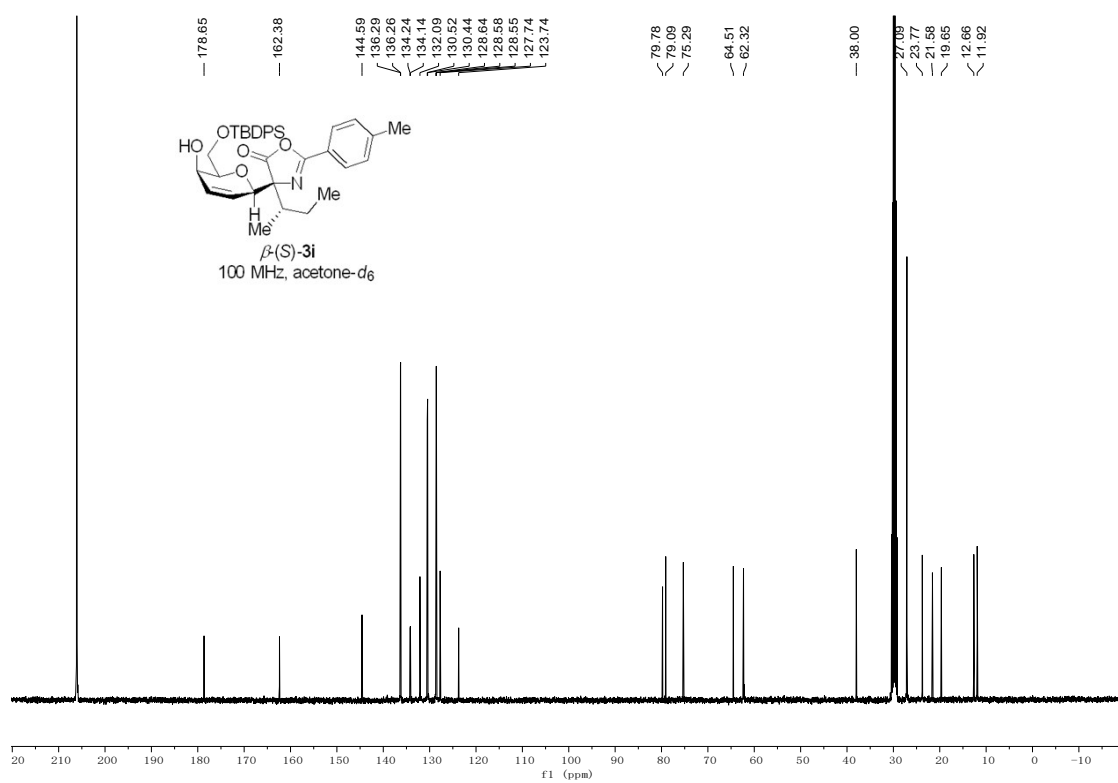

Figure S37.  $^{13}\text{C}$  NMR spectrum of  $\beta$ -(S)-3i

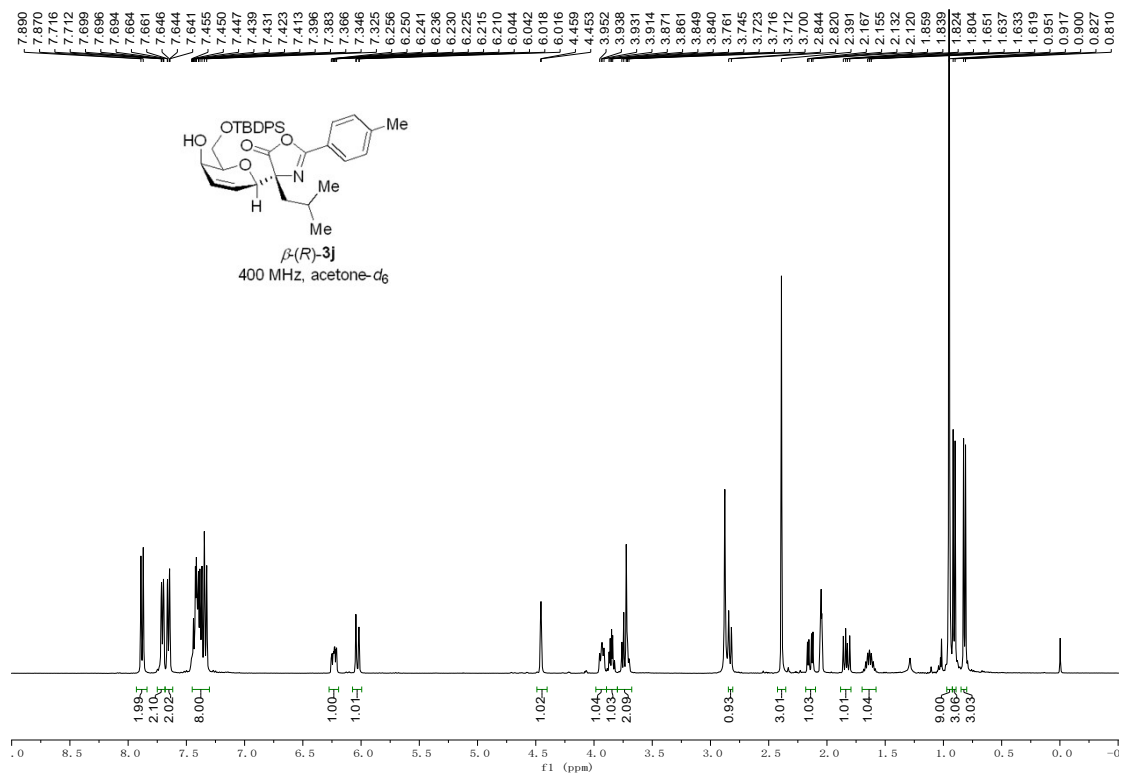

Figure S38.  $^1\text{H}$  NMR spectrum of  $\beta$ -(R)-3j

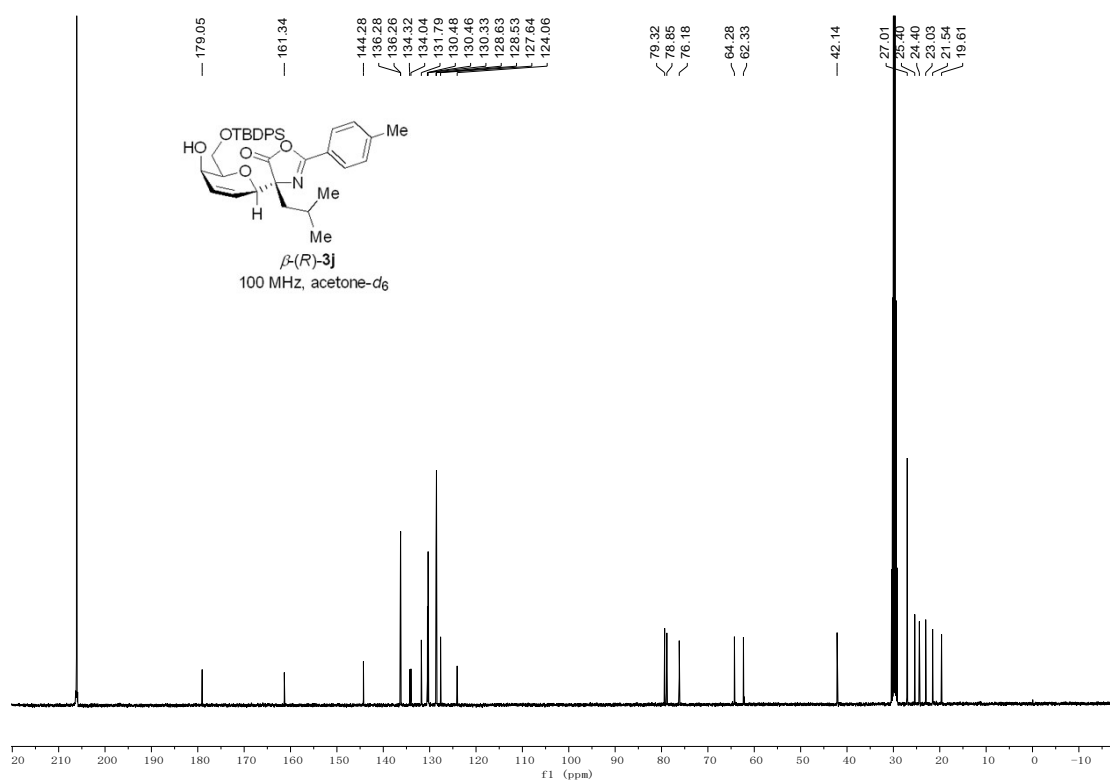

Figure S39.  $^{13}\text{C}$  NMR spectrum of  $\beta$ -(R)-3j

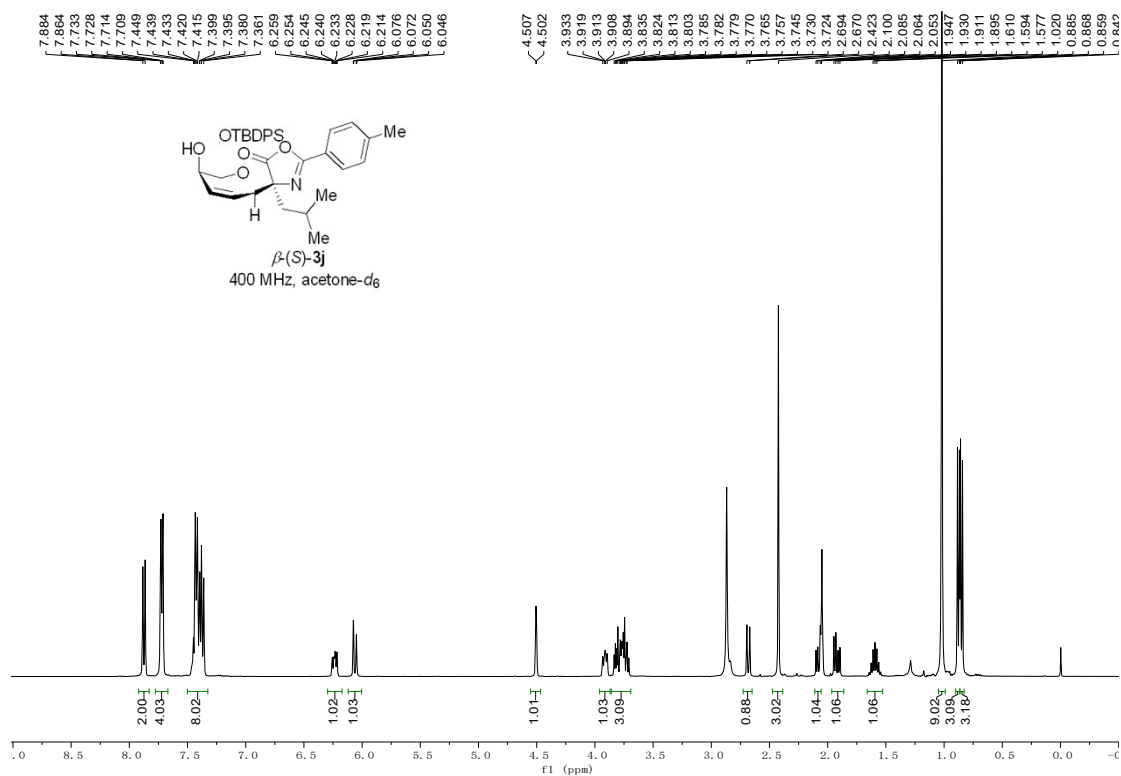

Figure S40.  $^1\text{H}$  NMR spectrum of  $\beta$ -(S)-3j

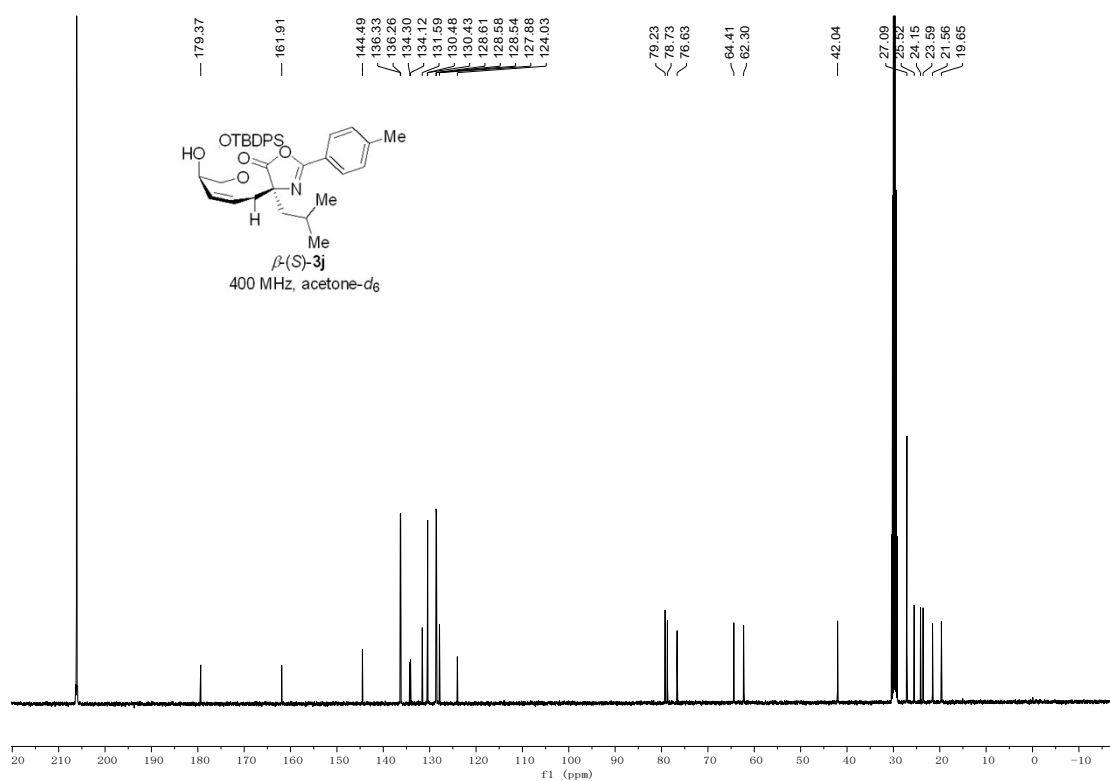

Figure S41.  $^{13}\text{C}$  NMR spectrum of  $\beta$ -(S)-3j

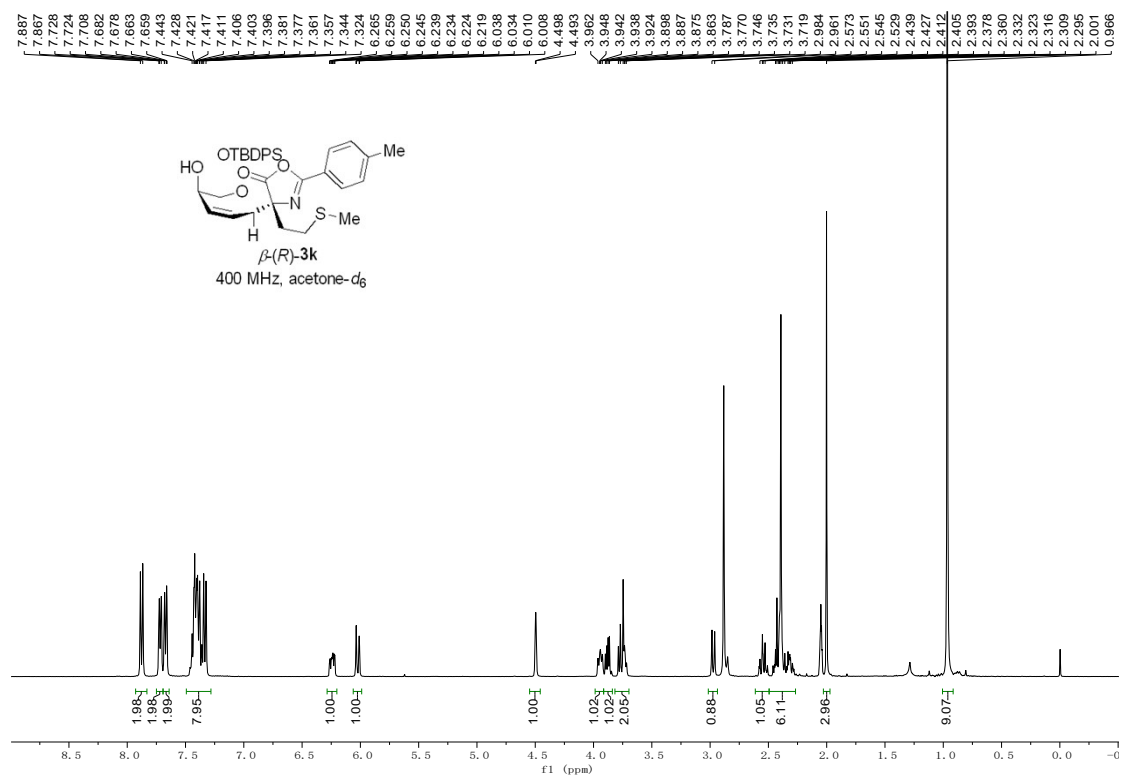

Figure S42.  $^1\text{H}$  NMR spectrum of  $\beta$ -(R)-3k

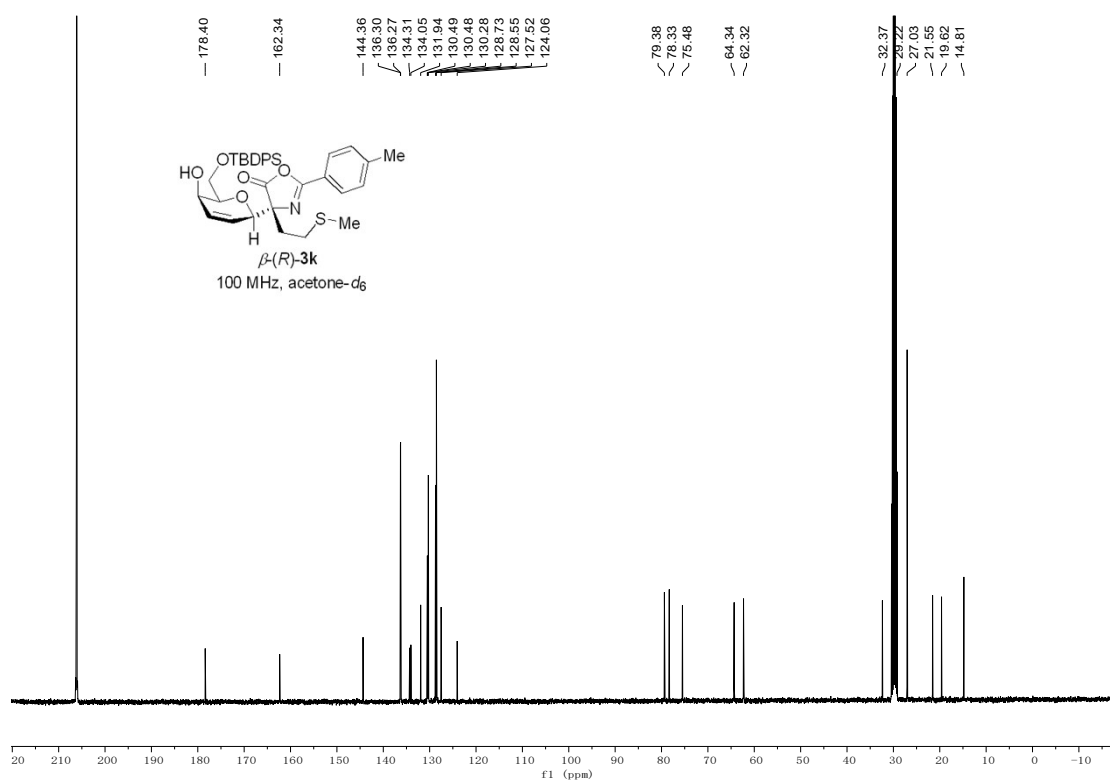

Figure S43.  $^{13}\text{C}$  NMR spectrum of  $\beta$ -(R)-3k



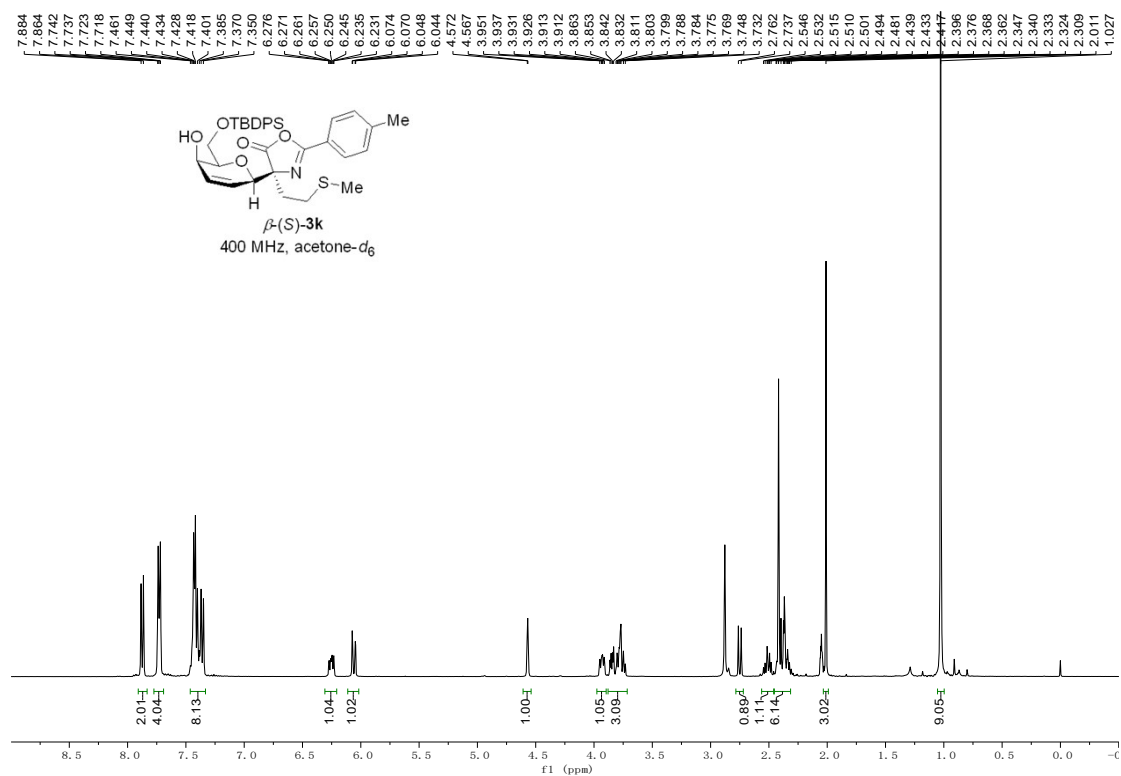

Figure S44.  $^1\text{H}$  NMR spectrum of  $\beta$ -(S)-3k

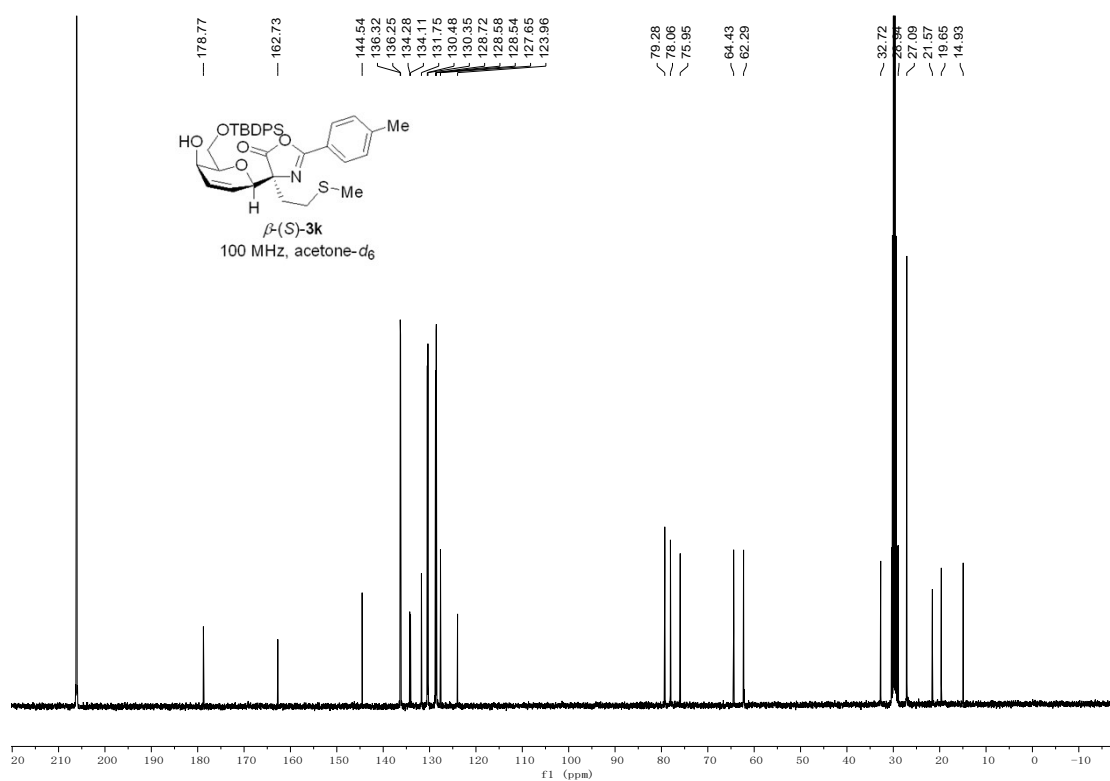

Figure S45.  $^{13}\text{C}$  NMR spectrum of  $\beta$ -(S)-3k

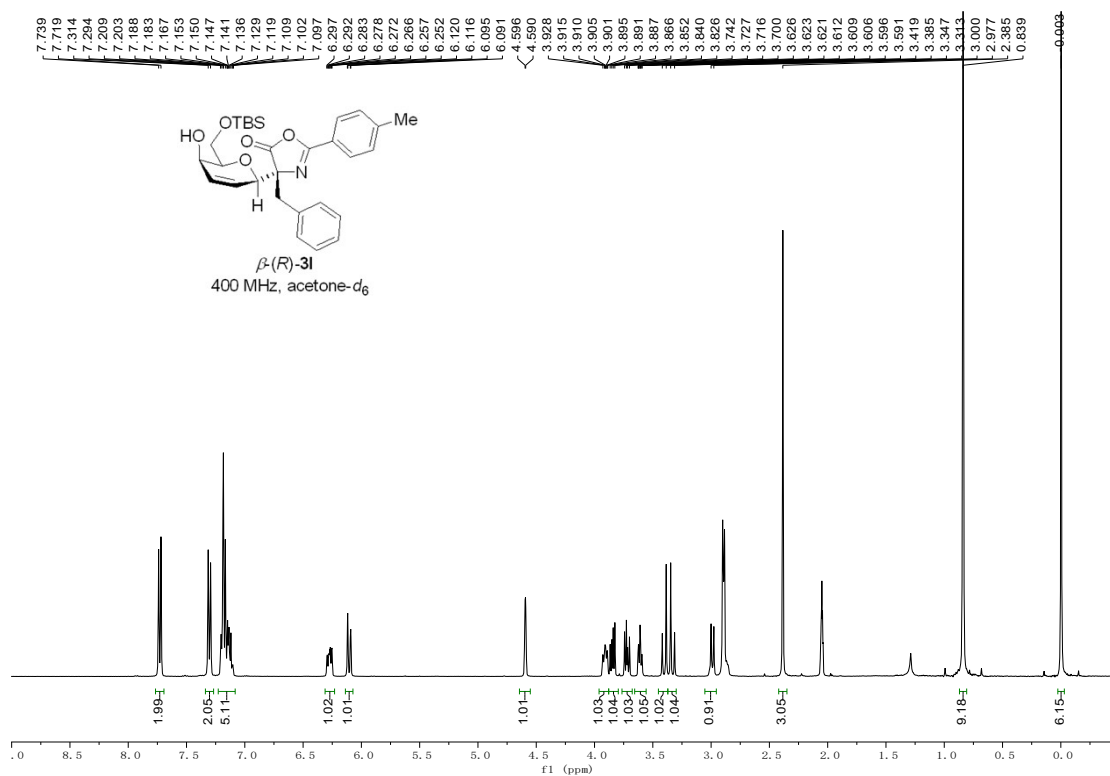

Figure S46.  $^1\text{H}$  NMR spectrum of  $\beta$ -(R)-31

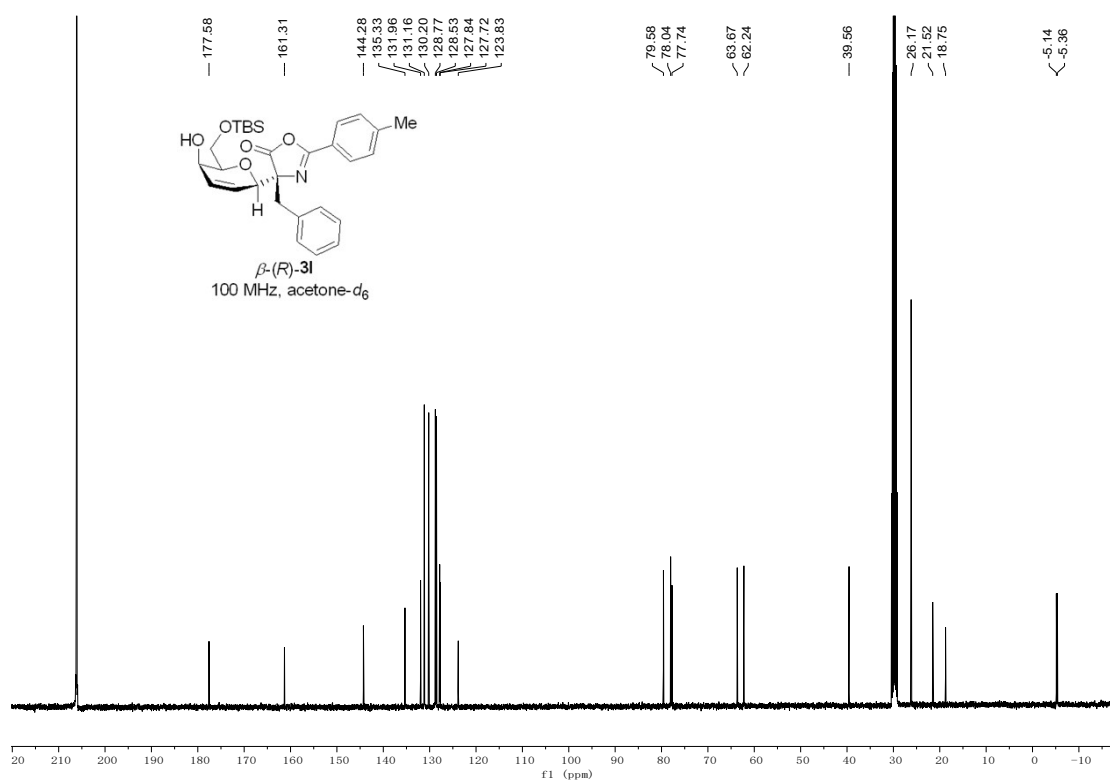

Figure S47.  $^{13}\text{C}$  NMR spectrum of  $\beta$ -(R)-31

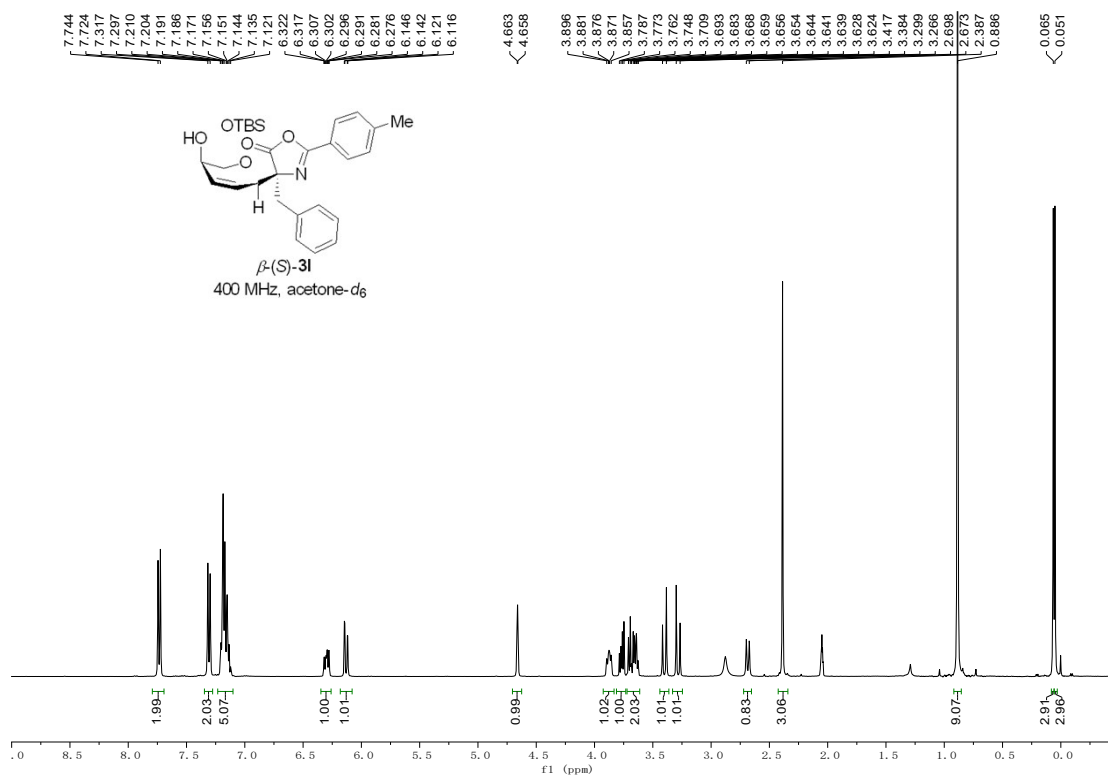

Figure S48.  $^1\text{H}$  NMR spectrum of  $\beta$ -(S)-31

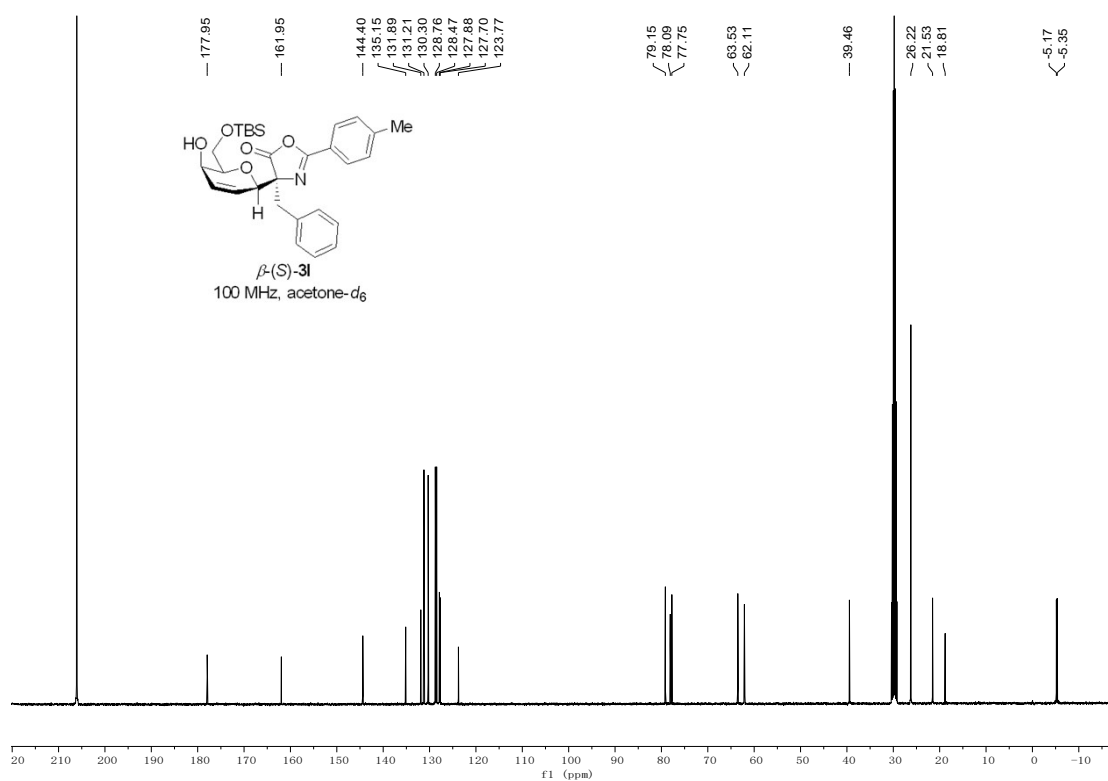

Figure S49.  $^{13}\text{C}$  NMR spectrum of  $\beta$ -(S)-31

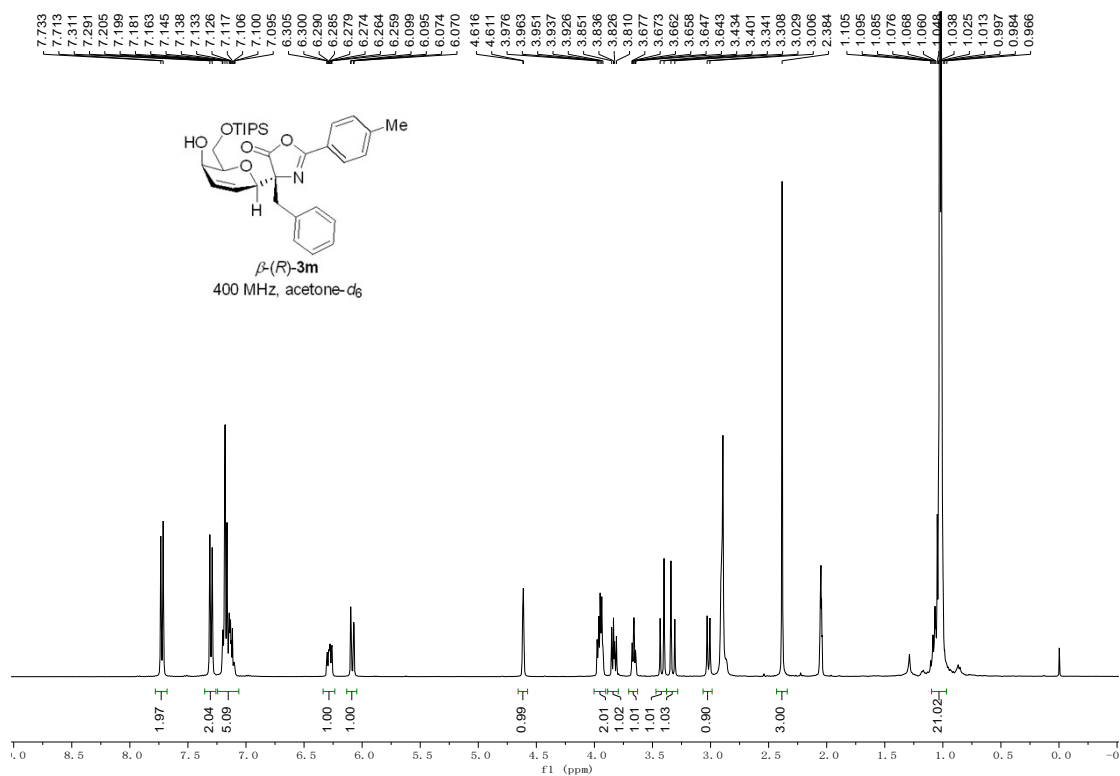

Figure S50.  $^1\text{H}$  NMR spectrum of  $\beta$ -(R)-3m

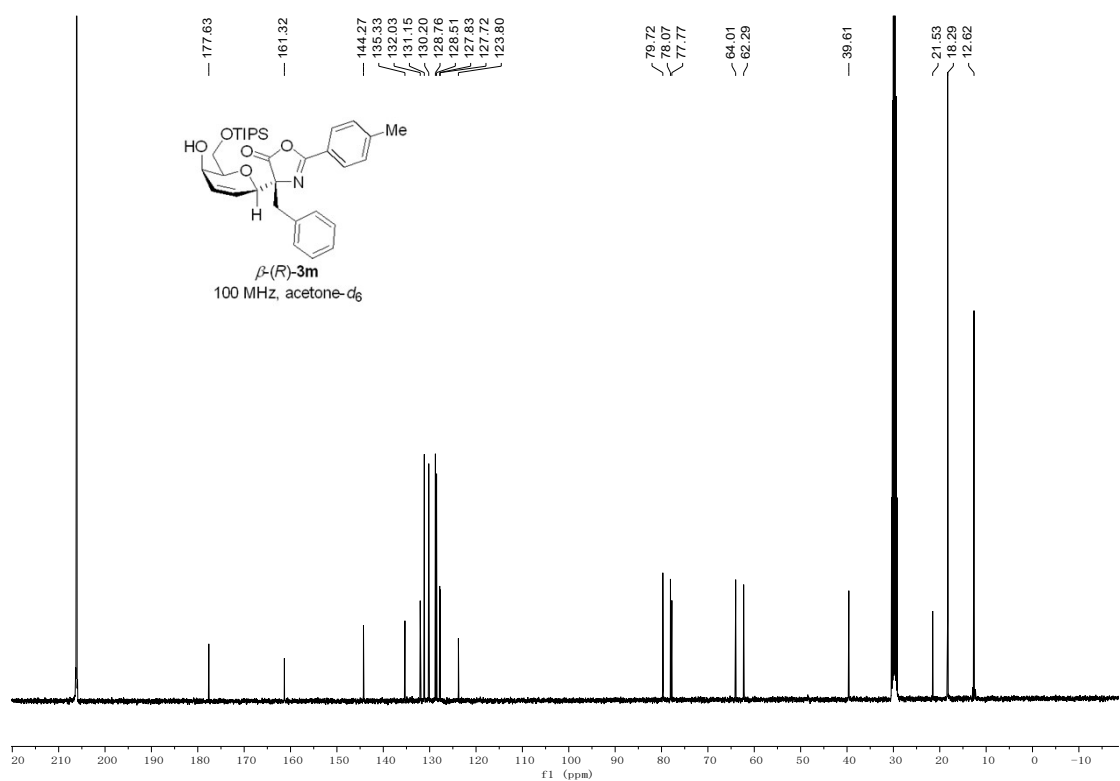

Figure S51.  $^{13}\text{C}$  NMR spectrum of  $\beta$ -(R)-3m

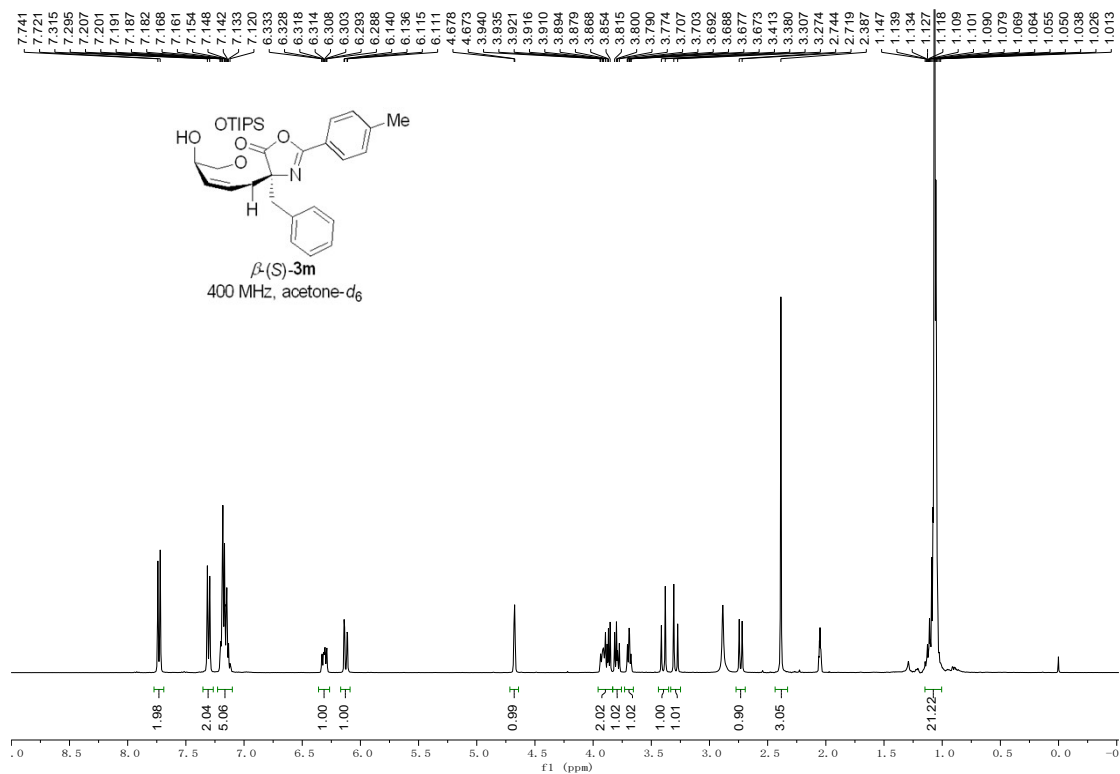

Figure S52.  $^1\text{H}$  NMR spectrum of  $\beta$ -(S)-3m

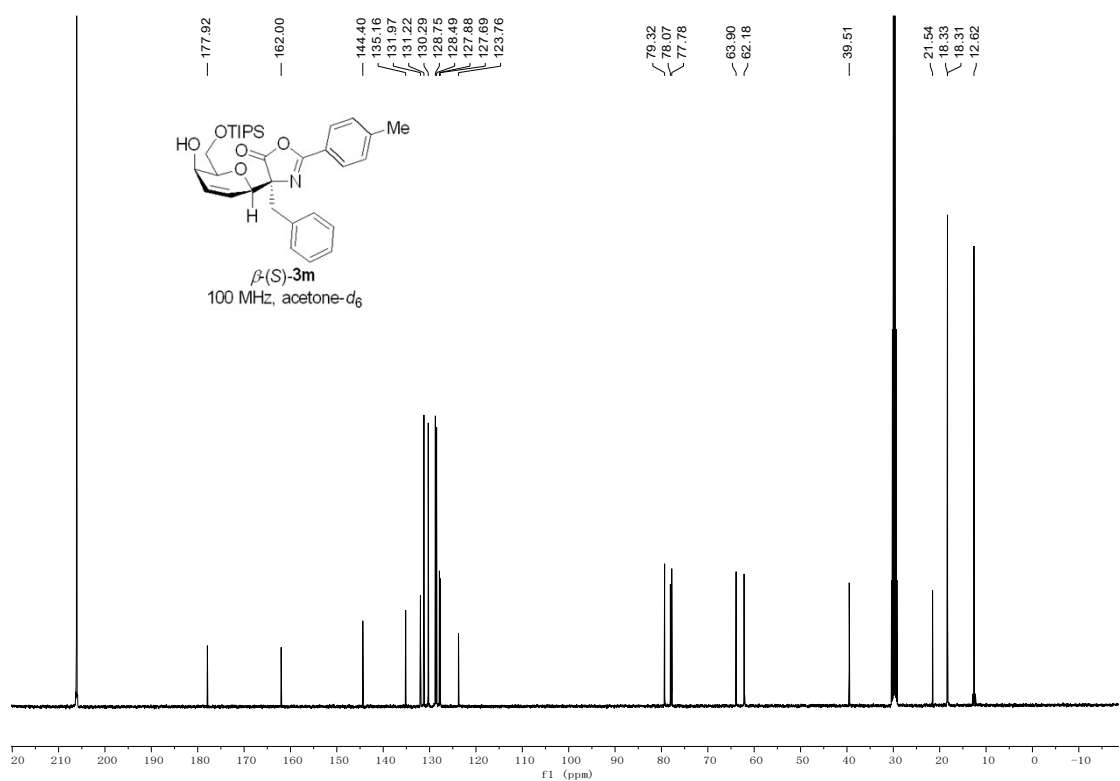

Figure S53.  $^{13}\text{C}$  NMR spectrum of  $\beta$ -(S)-3m

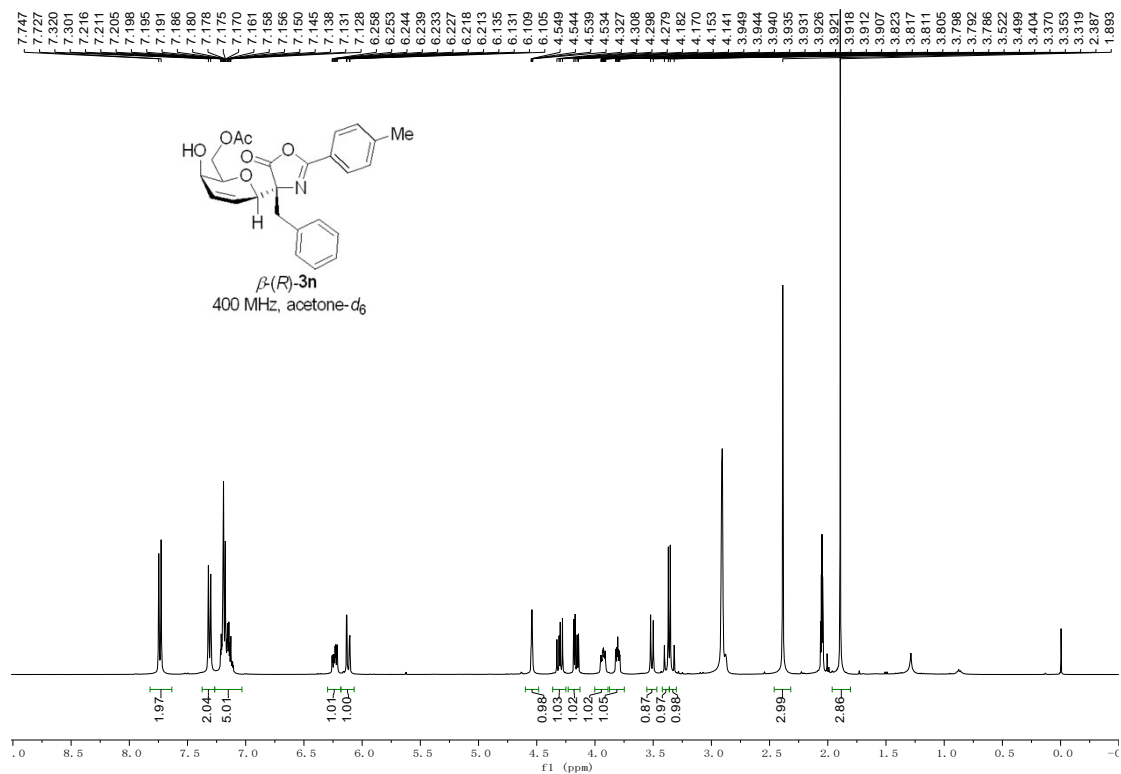

Figure S54.  $^1\text{H}$  NMR spectrum of  $\beta$ -(R)-3n

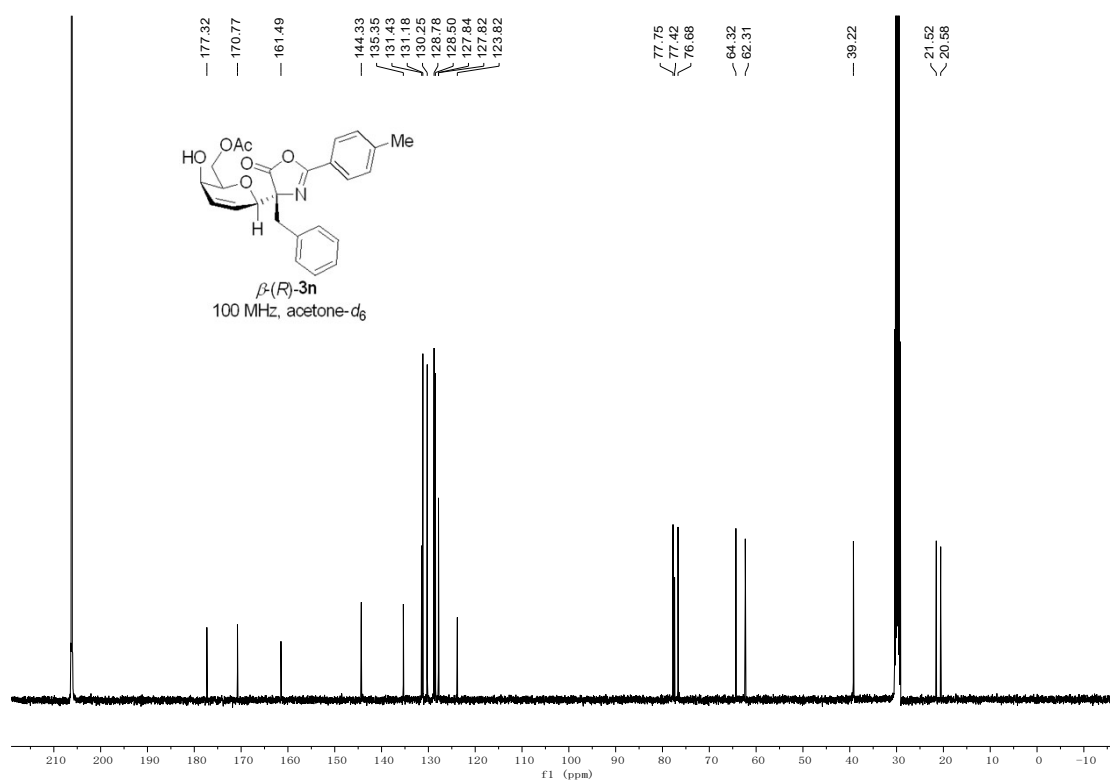

Figure S55.  $^{13}\text{C}$  NMR spectrum of  $\beta$ -(R)-3n

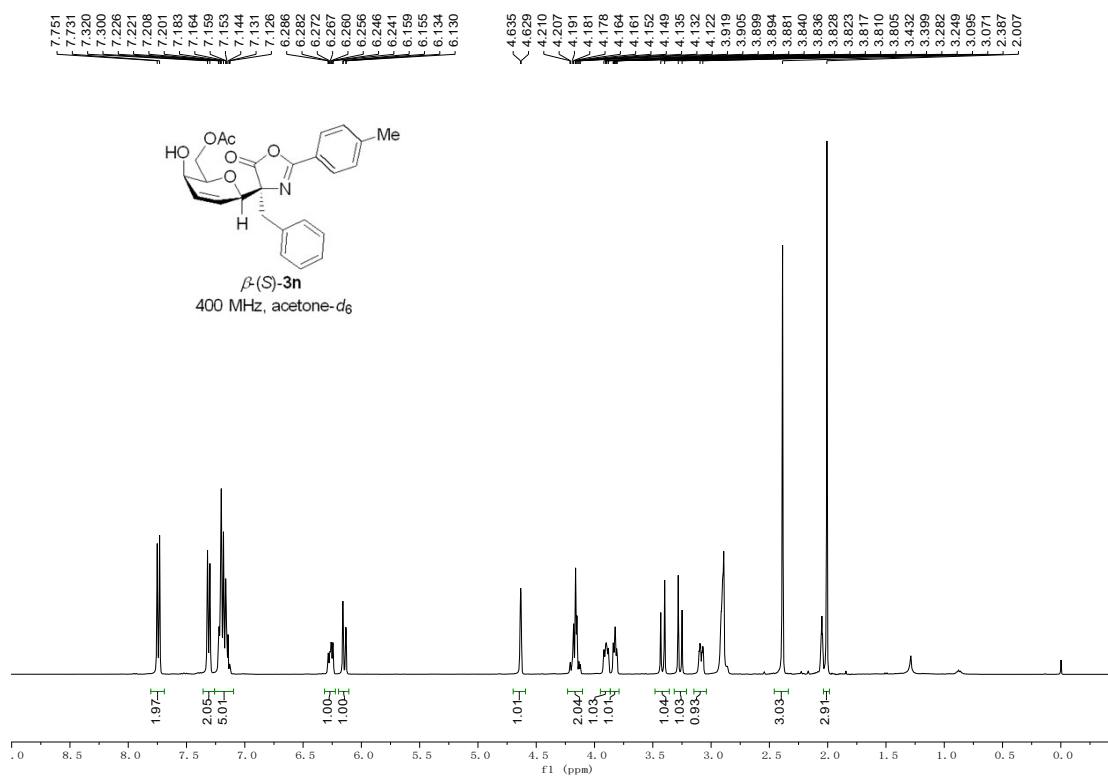

Figure S56.  $^1\text{H}$  NMR spectrum of  $\beta$ -(S)-3n

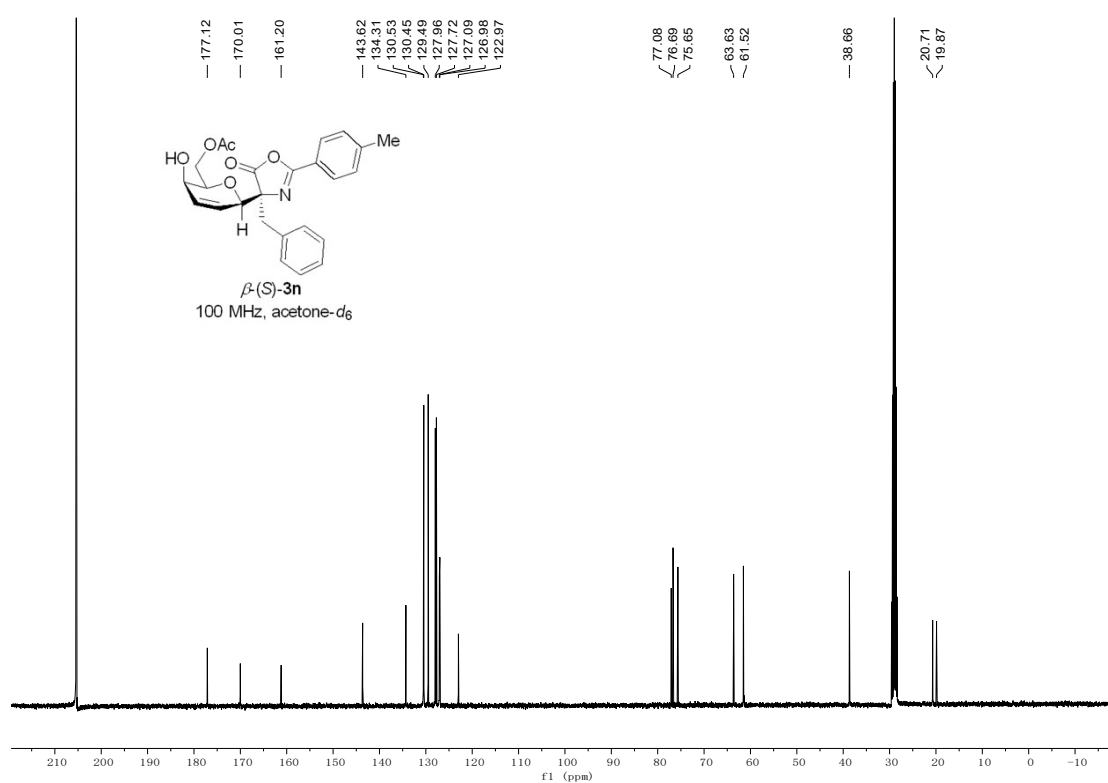

Figure S57.  $^{13}\text{C}$  NMR spectrum of  $\beta$ -(S)-3n

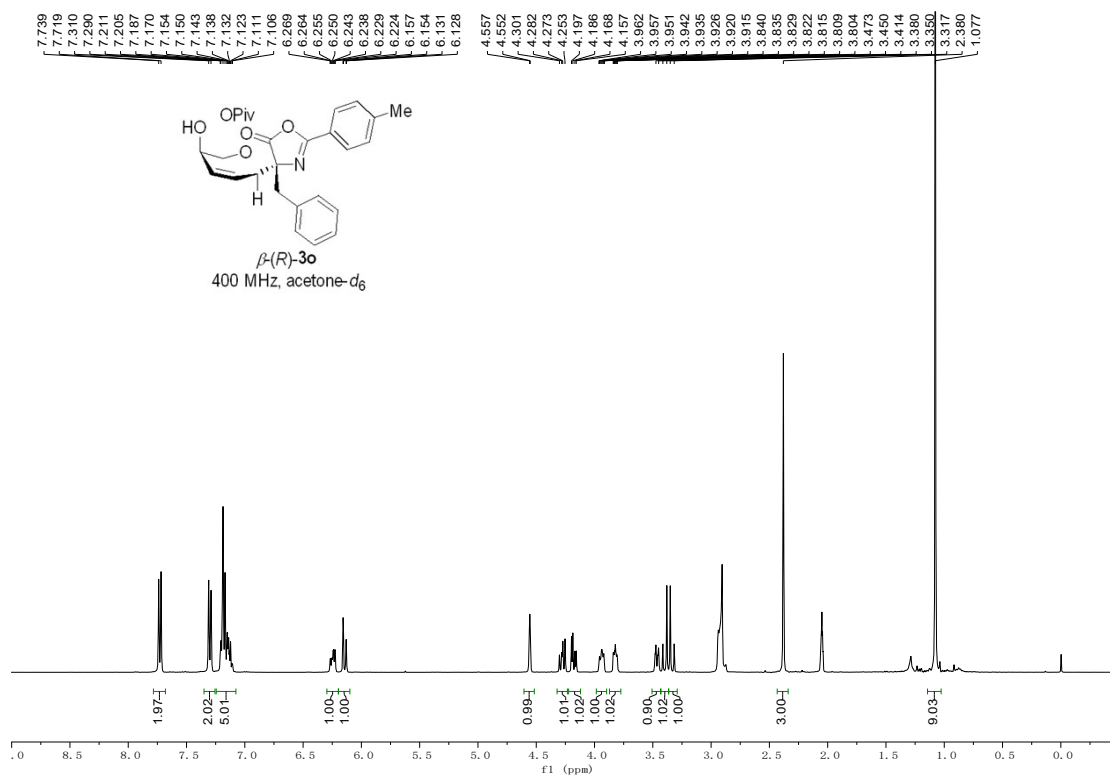

Figure S58.  $^1\text{H}$  NMR spectrum of  $\beta$ -(R)-3o

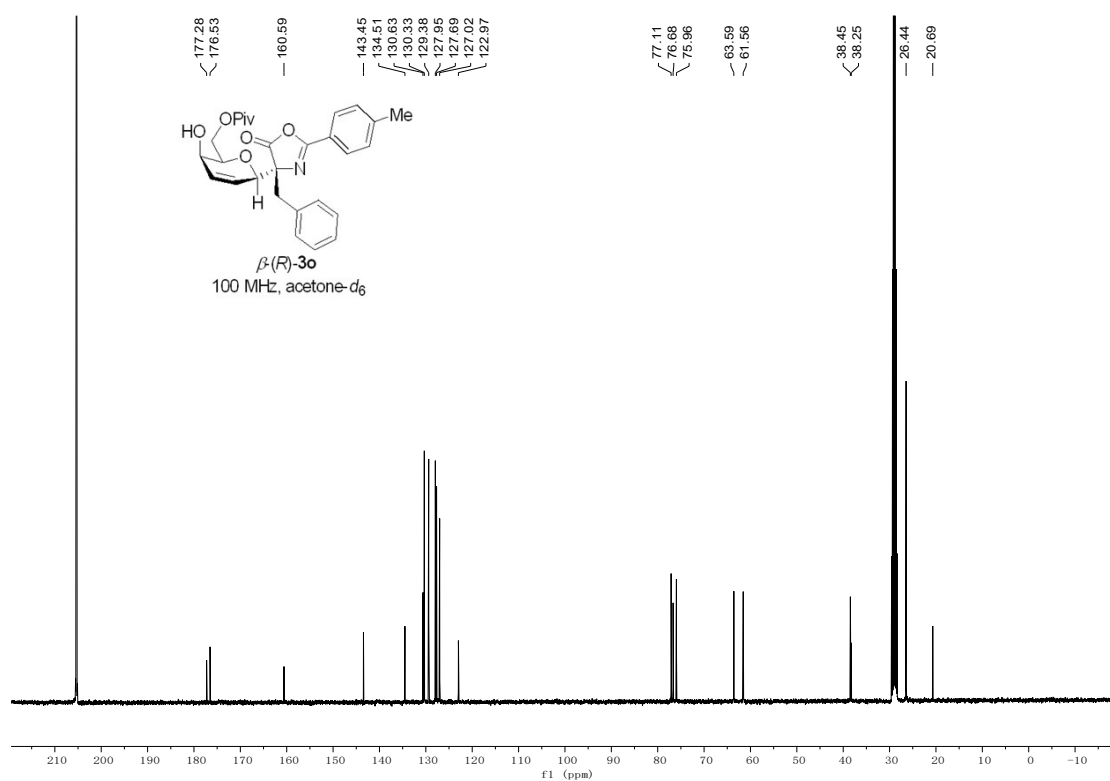

Figure S59.  $^{13}\text{C}$  NMR spectrum of  $\beta$ -(R)-3o



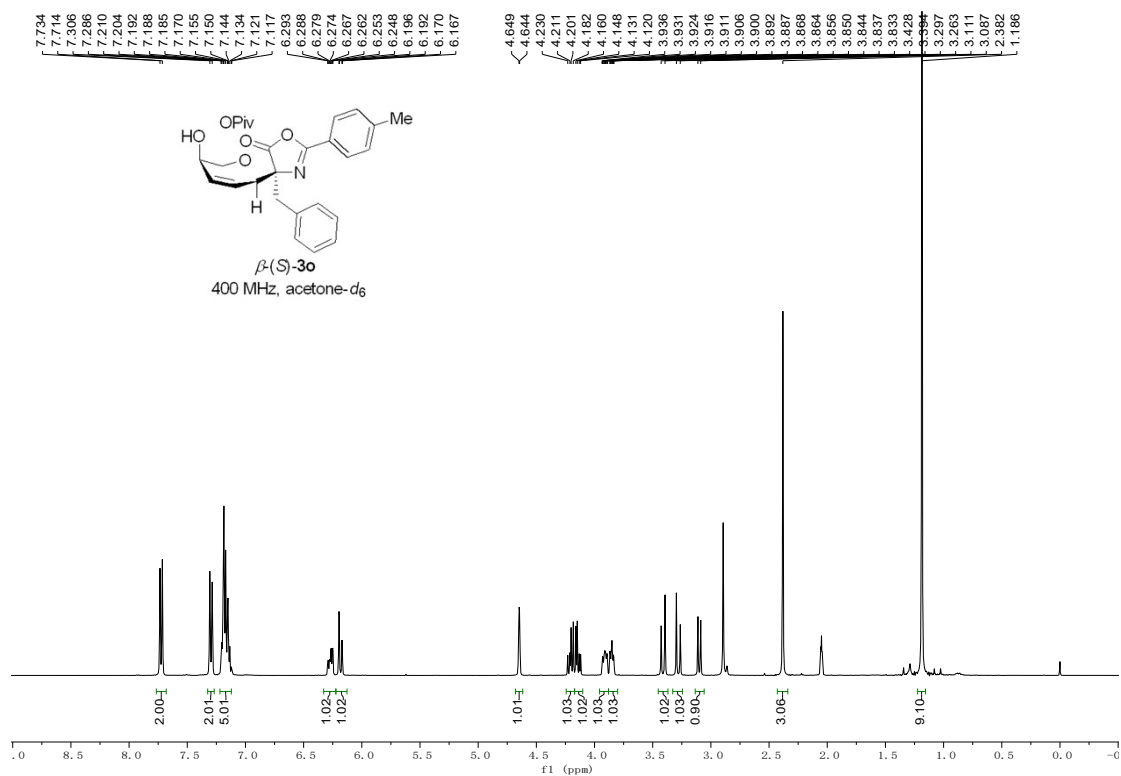

Figure S60.  $^1\text{H}$  NMR spectrum of  $\beta$ -(S)-3o

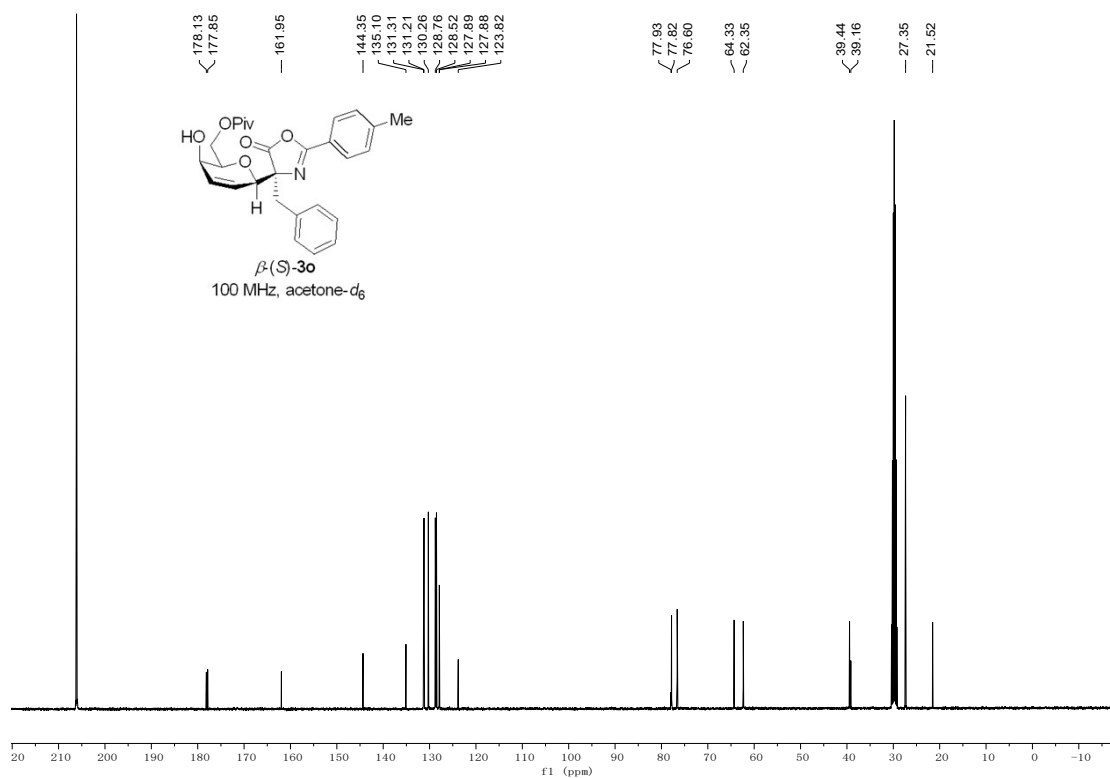

Figure S61.  $^{13}\text{C}$  NMR spectrum of  $\beta$ -(S)-3o

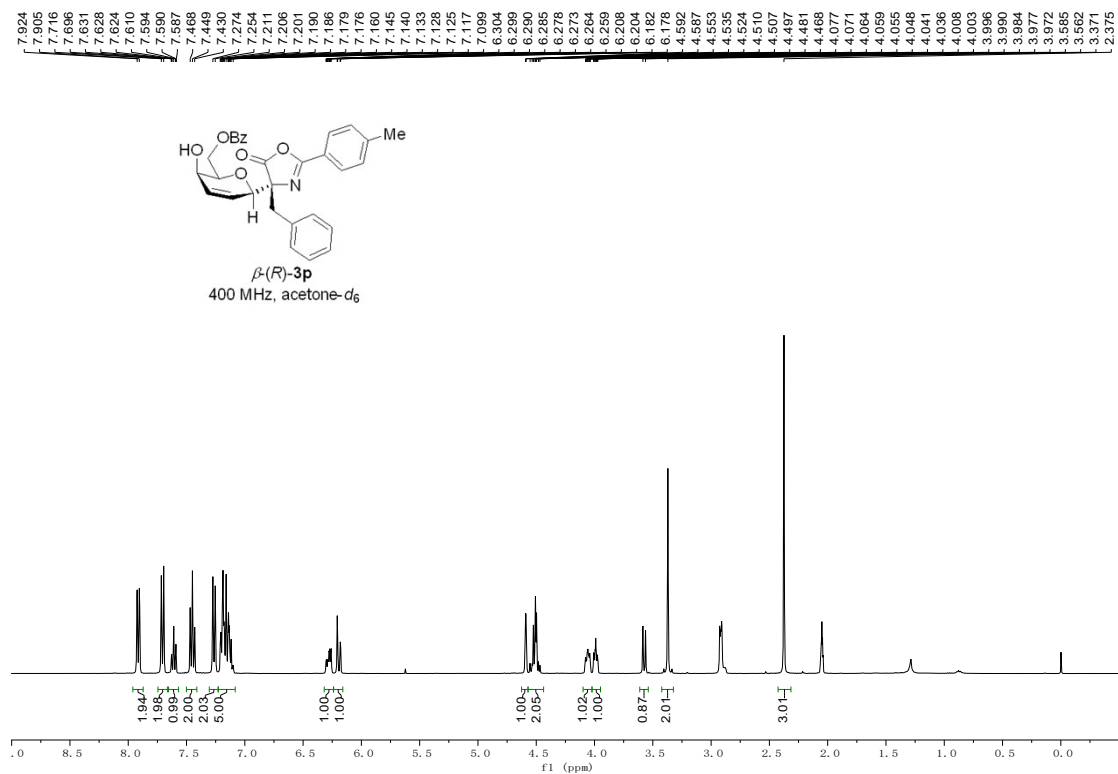

Figure S62. <sup>1</sup>H NMR spectrum of  $\beta$ -(*R*)-**3p**

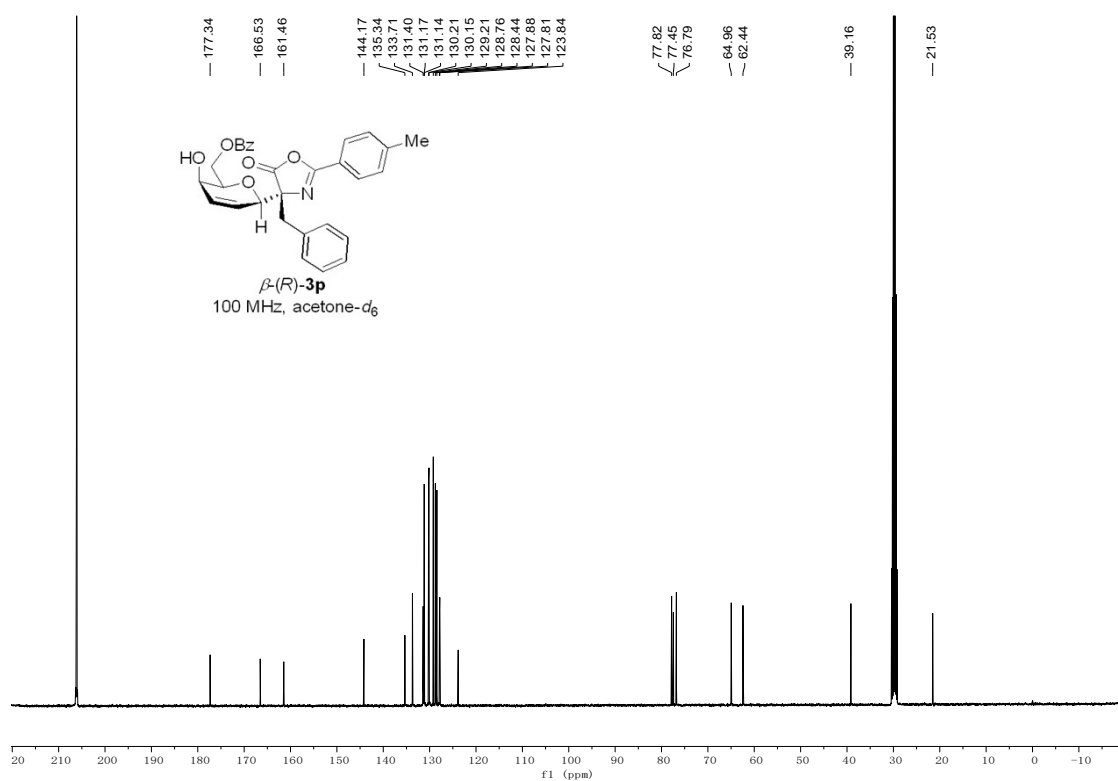

Figure S63. <sup>13</sup>C NMR spectrum of  $\beta$ -(*R*)-**3p**

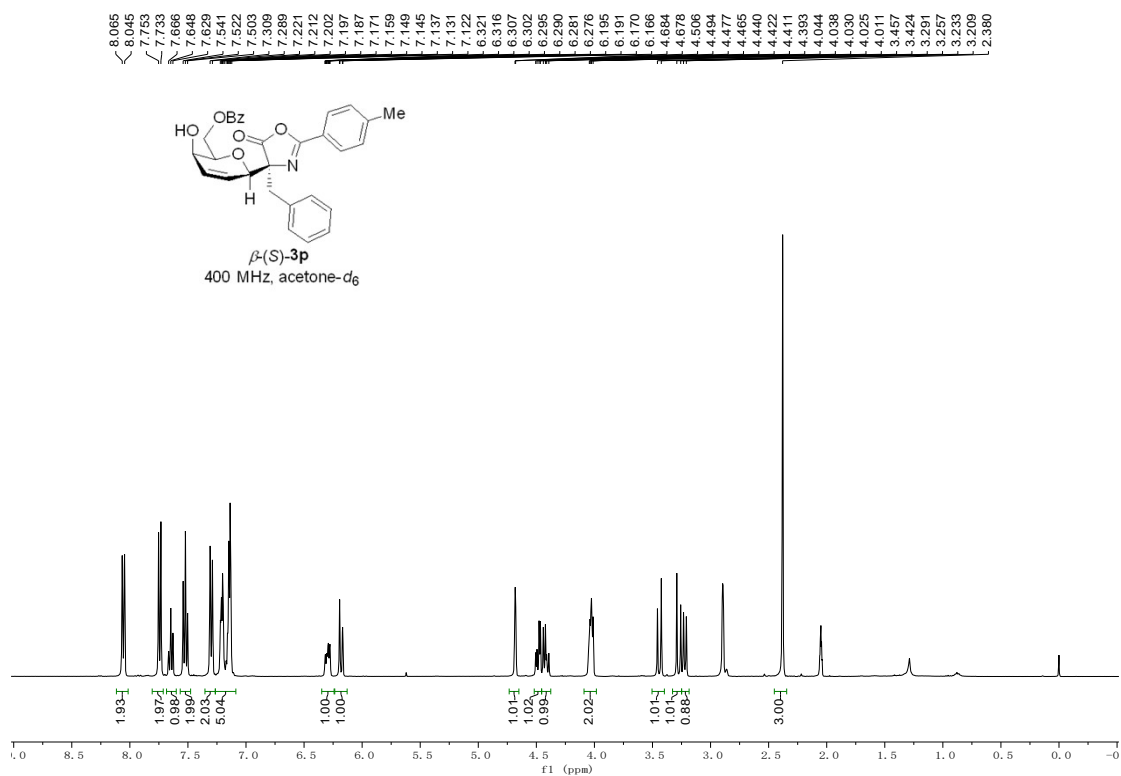

Figure S64.  $^1\text{H}$  NMR spectrum of  $\beta$ -(S)-3p

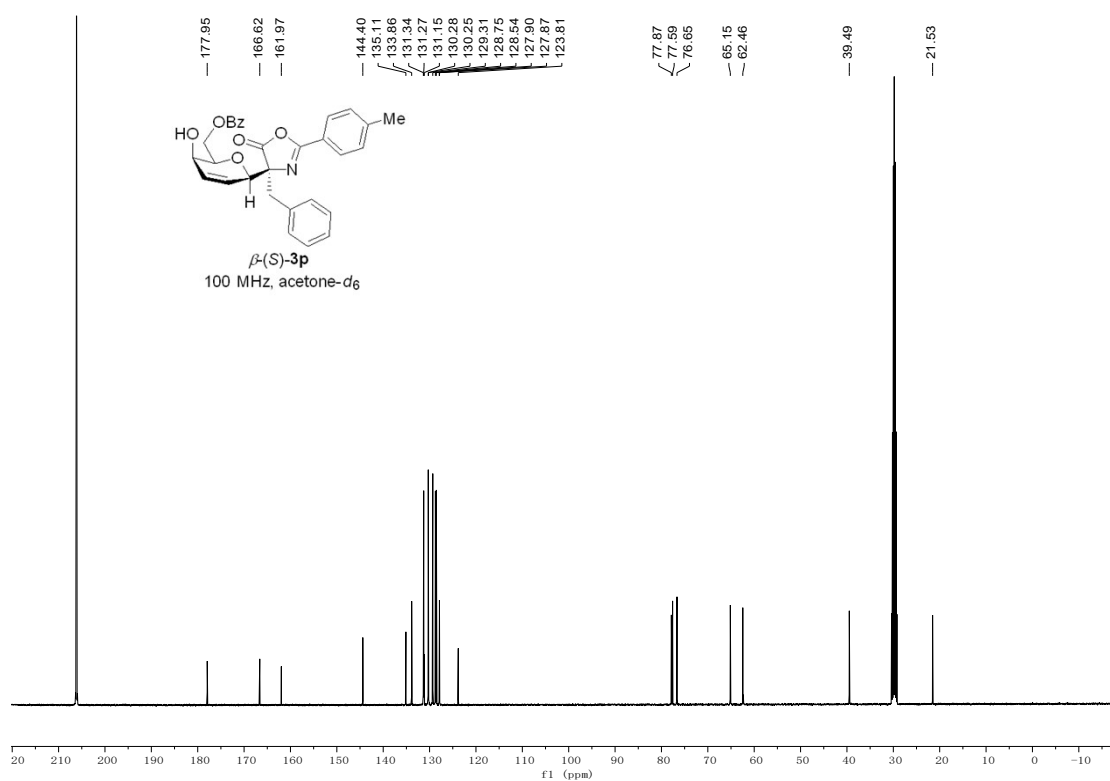

Figure S65.  $^{13}\text{C}$  NMR spectrum of  $\beta$ -(S)-3p

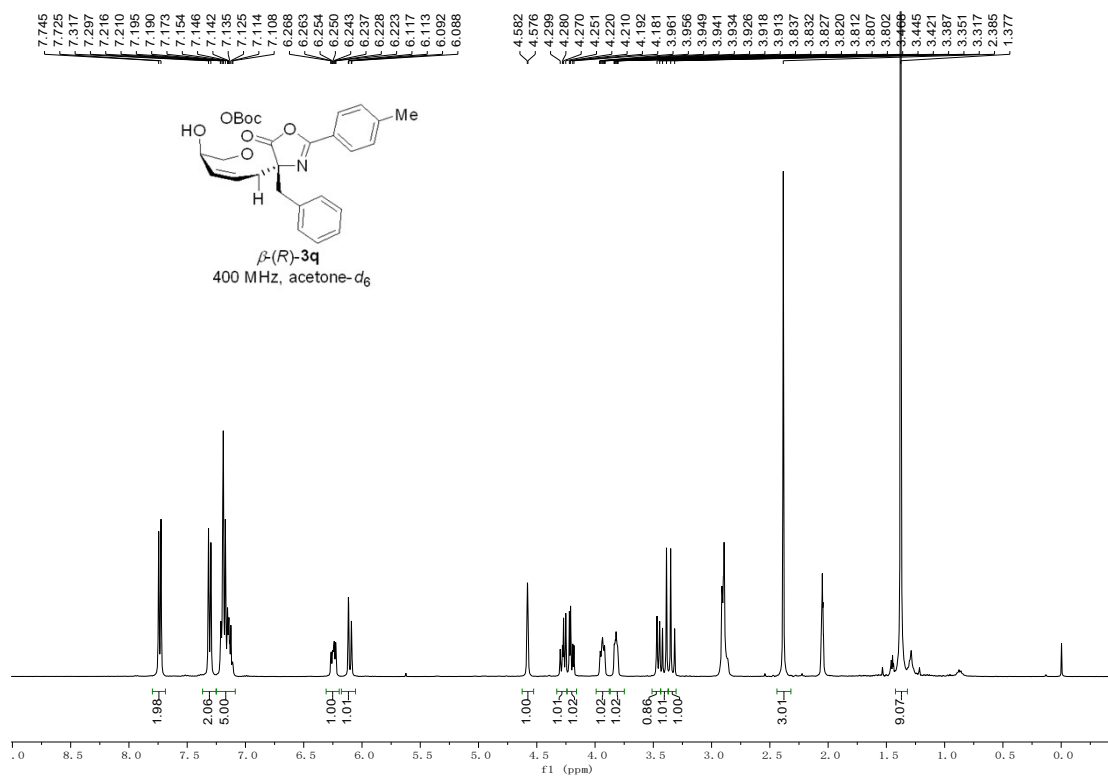

Figure S66. <sup>1</sup>H NMR spectrum of  $\beta$ -(*R*)-3q

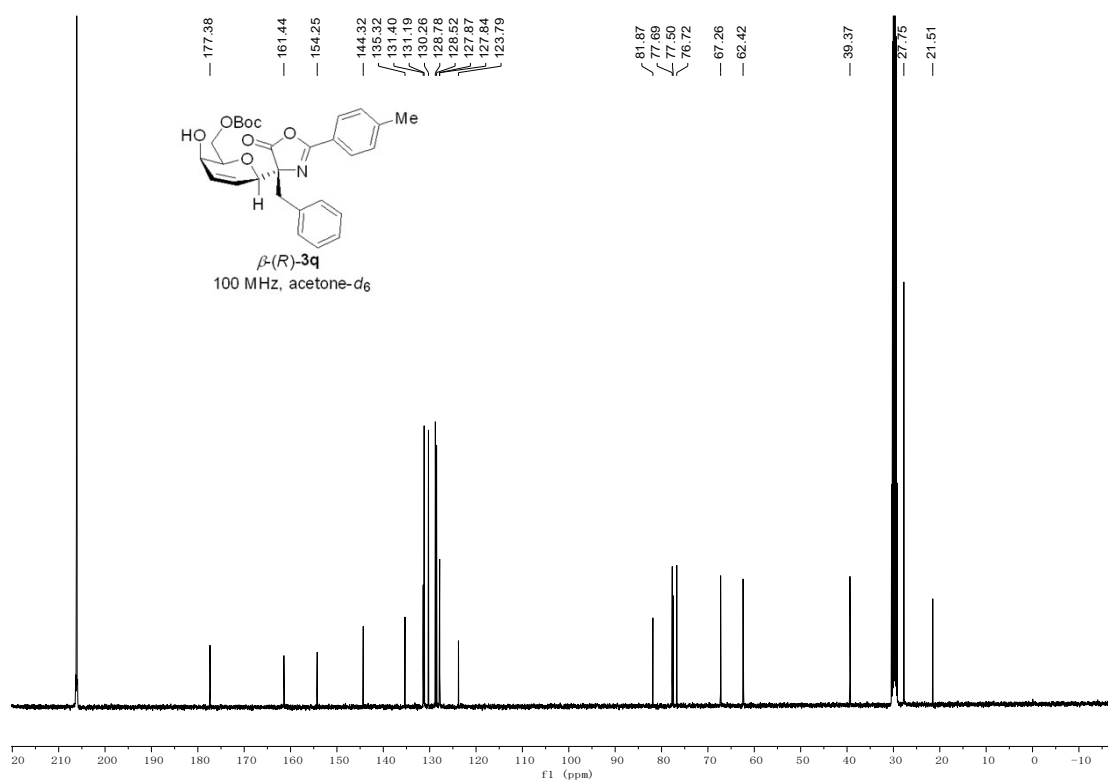

Figure S67. <sup>13</sup>C NMR spectrum of  $\beta$ -(*R*)-3q

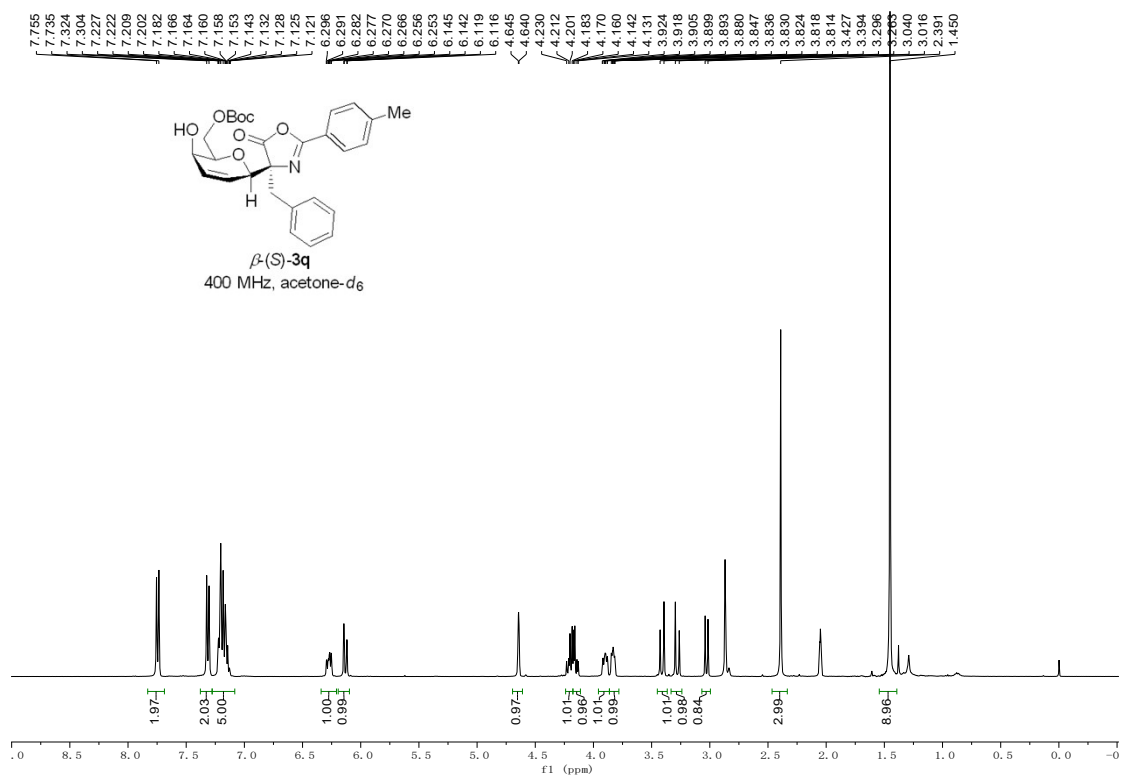

Figure S68.  $^1\text{H}$  NMR spectrum of  $\beta$ -(S)-3q

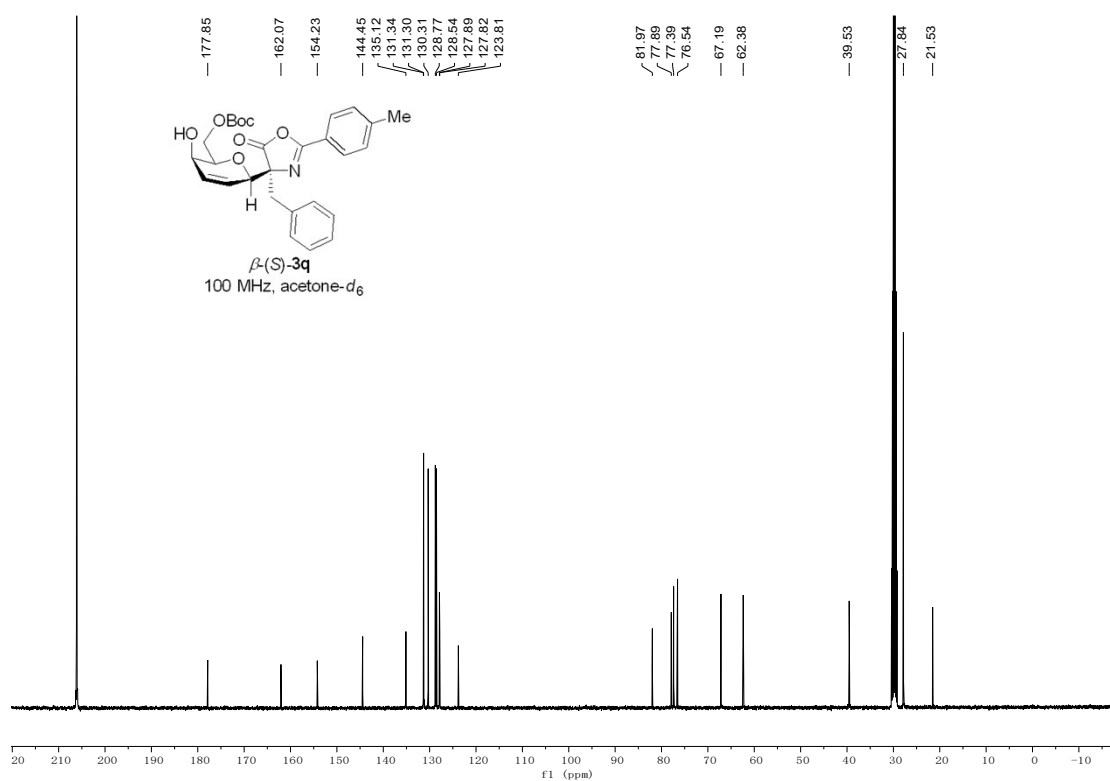

Figure S69.  $^{13}\text{C}$  NMR spectrum of  $\beta$ -(S)-3q

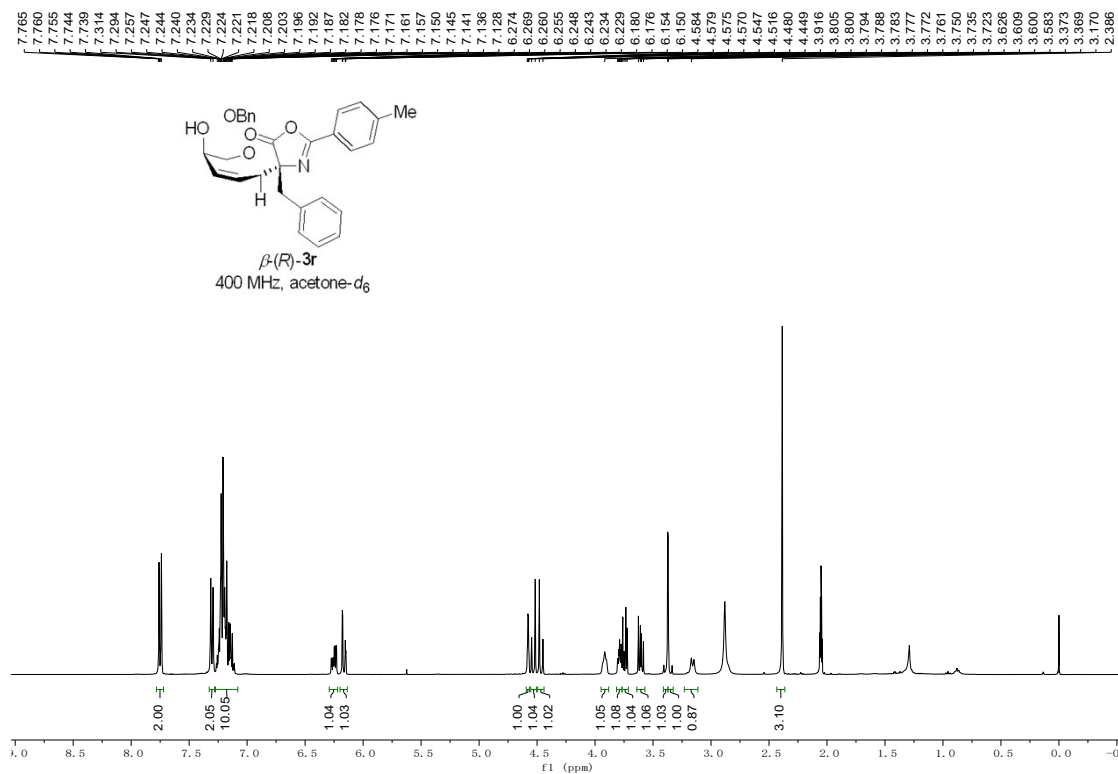

Figure S70.  $^1\text{H}$  NMR spectrum of  $\beta$ -(*R*)-**3r**

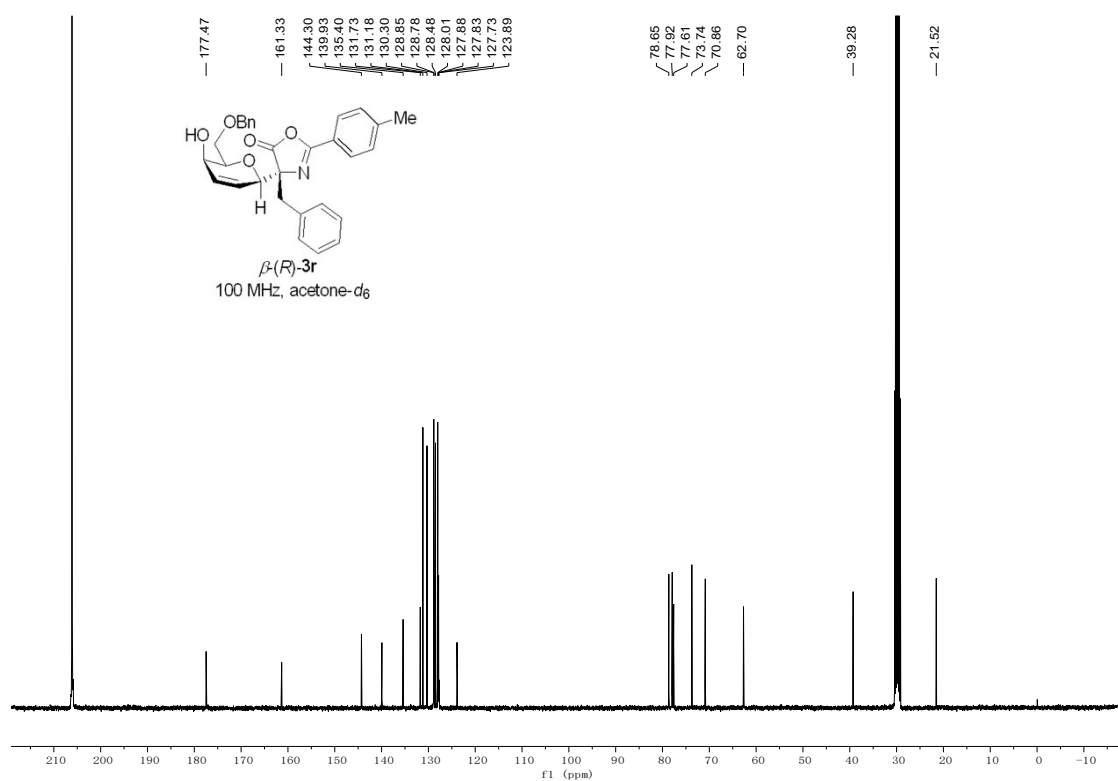

Figure S71.  $^{13}\text{C}$  NMR spectrum of  $\beta$ -(*R*)-**3r**

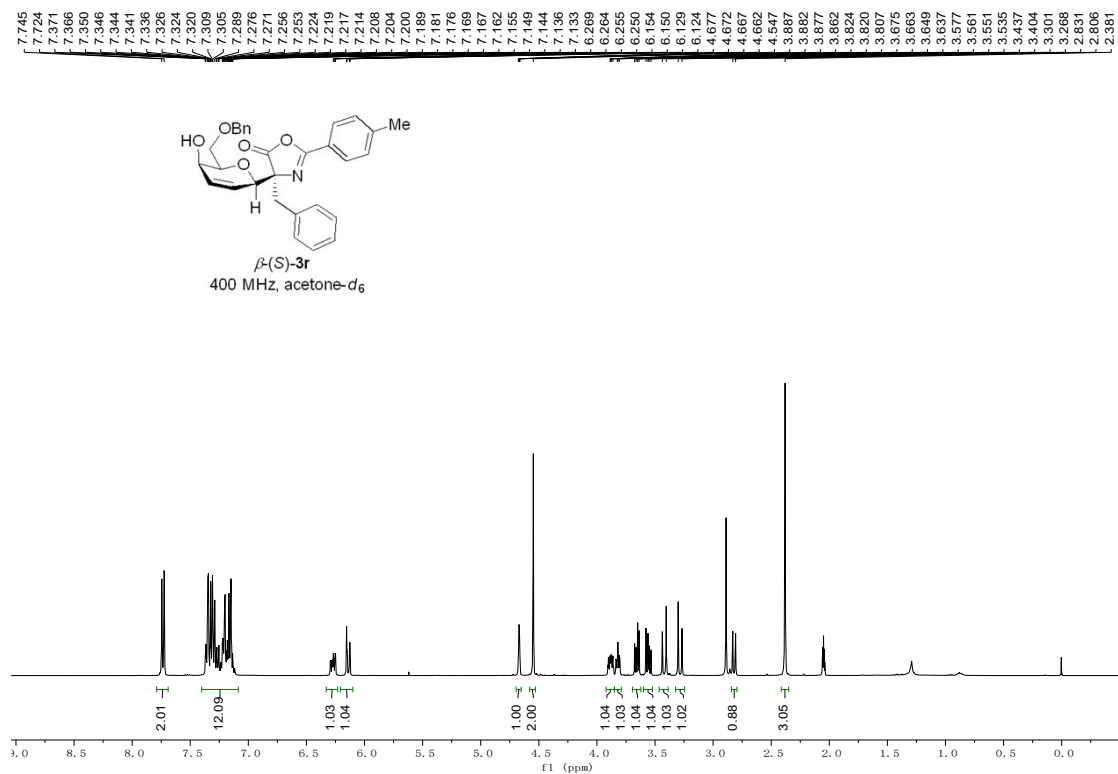

Figure S72.  $^1\text{H}$  NMR spectrum of  $\beta$ -(S)-3r

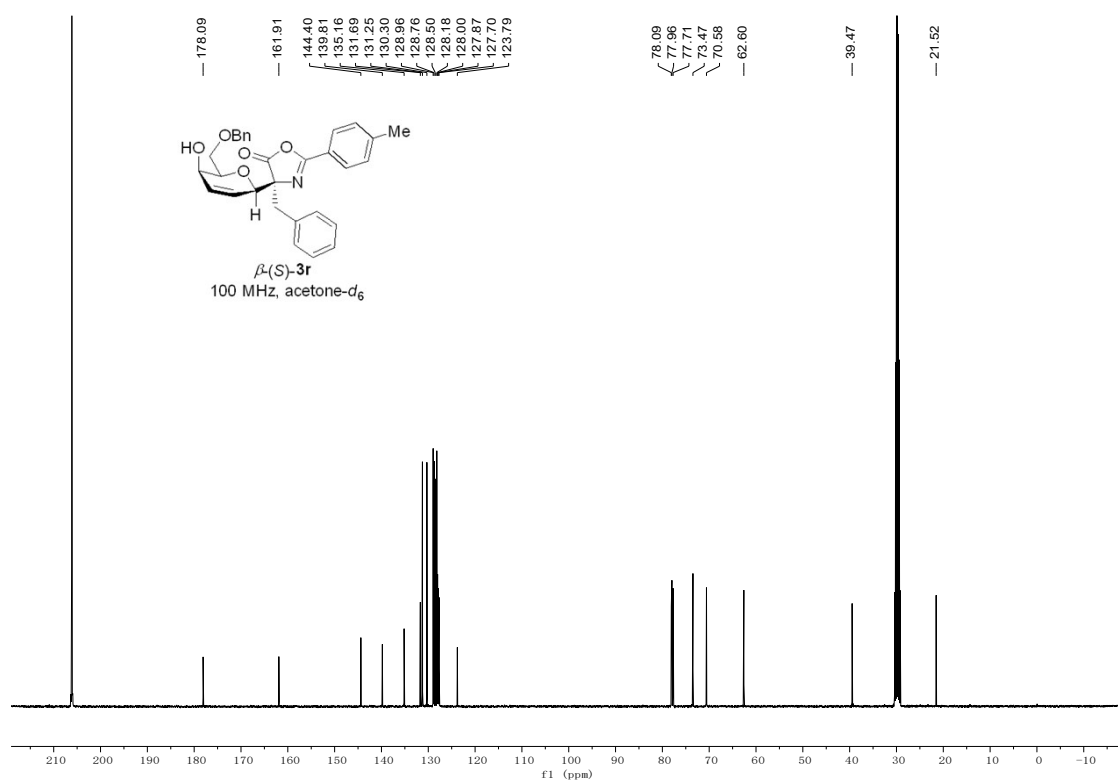

Figure S73.  $^{13}\text{C}$  NMR spectrum of  $\beta$ -(S)-3r

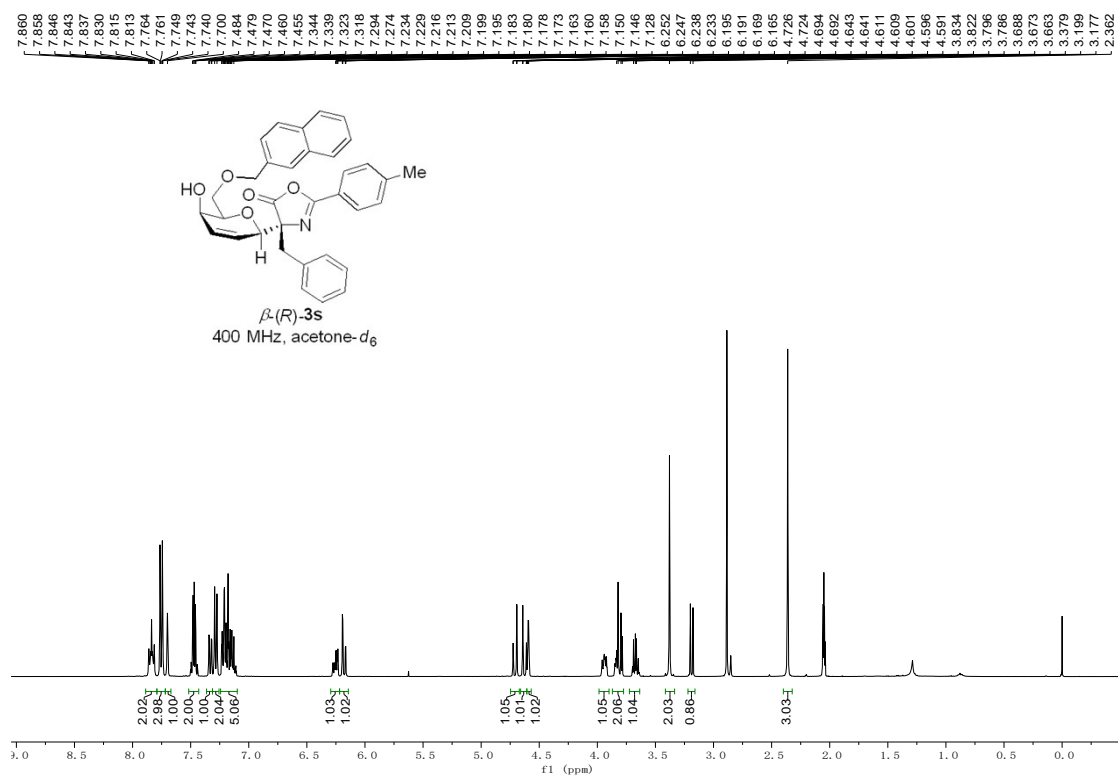

Figure S74.  $^1\text{H}$  NMR spectrum of  $\beta$ -(*R*)-**3s**

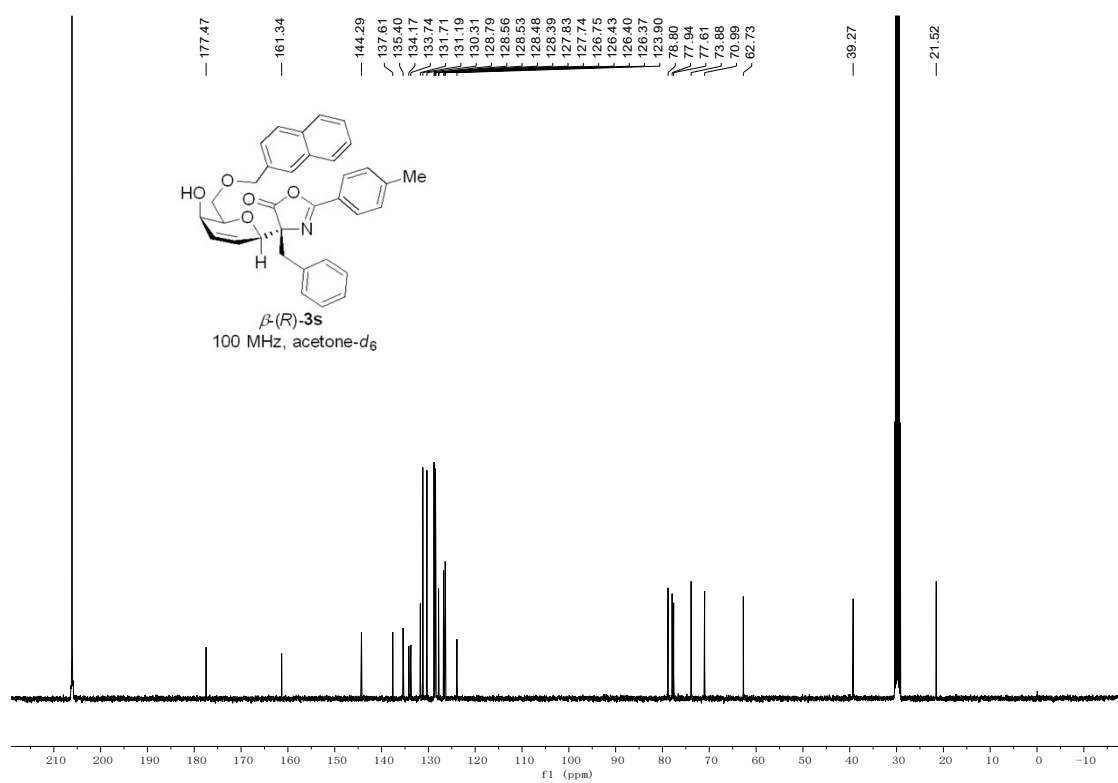

Figure S75.  $^{13}\text{C}$  NMR spectrum of  $\beta$ -(*R*)-**3s**



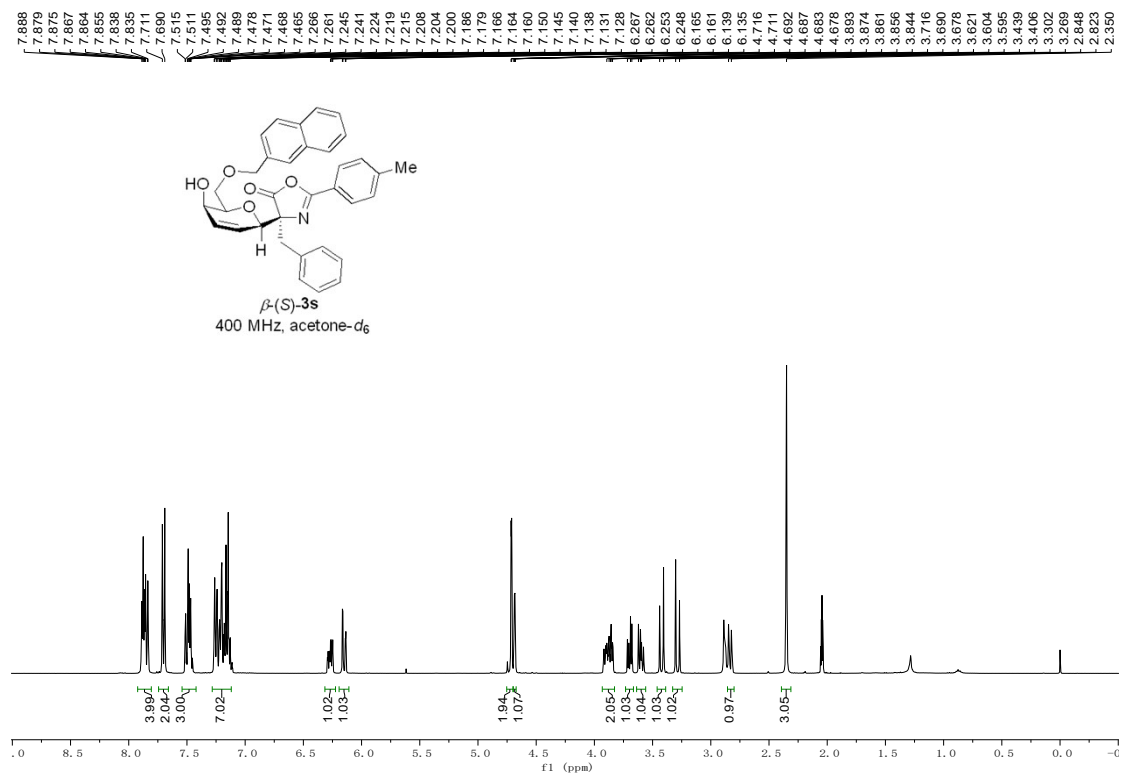

Figure S76.  $^1\text{H}$  NMR spectrum of  $\beta$ -(S)-3s

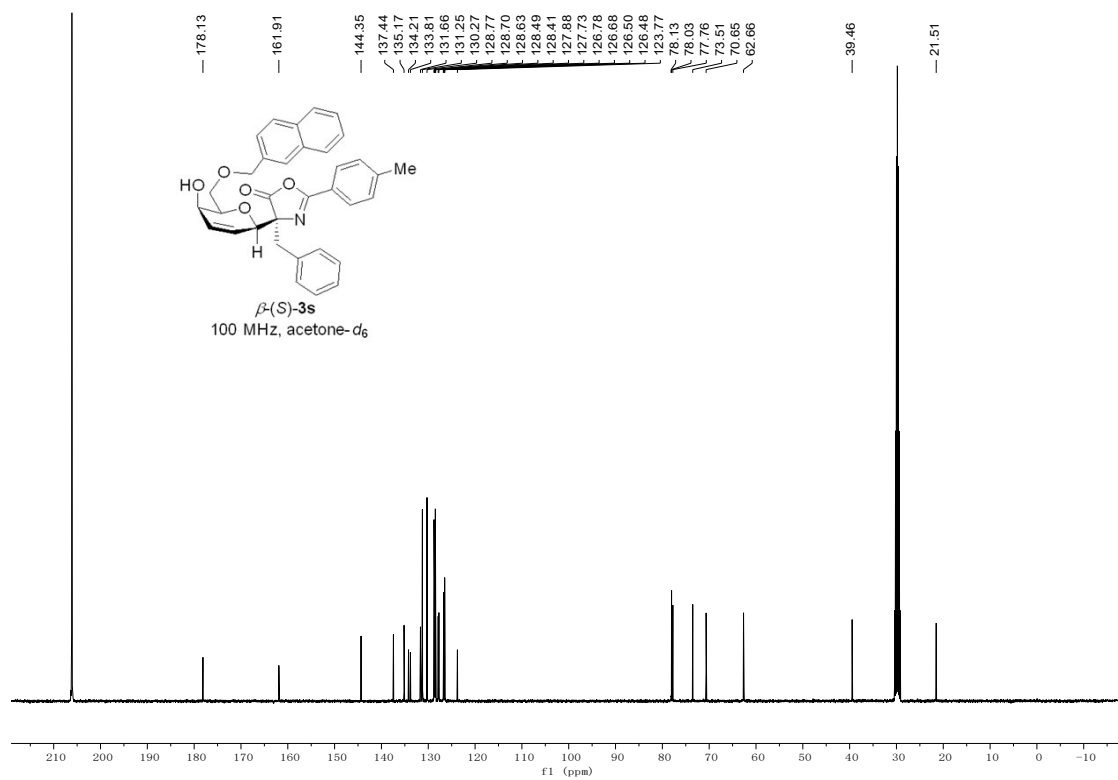

Figure S77.  $^{13}\text{C}$  NMR spectrum of  $\beta$ -(S)-3s

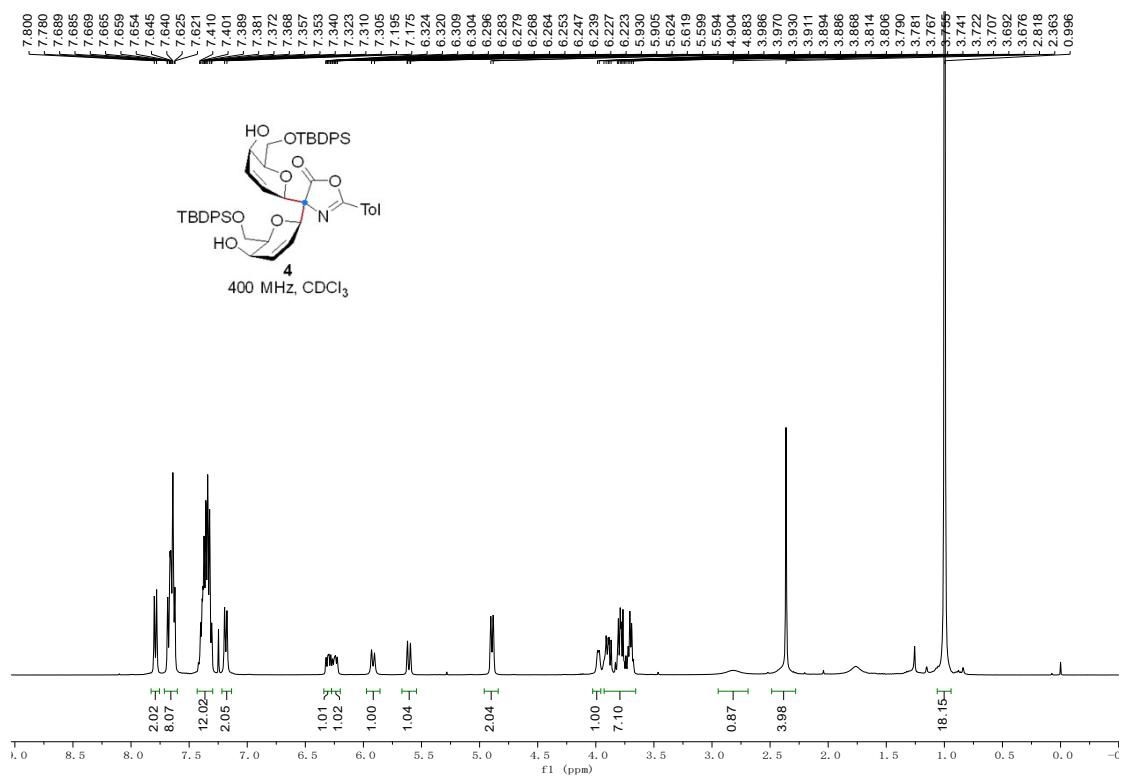

Figure S78. <sup>1</sup>H NMR spectrum of **4**

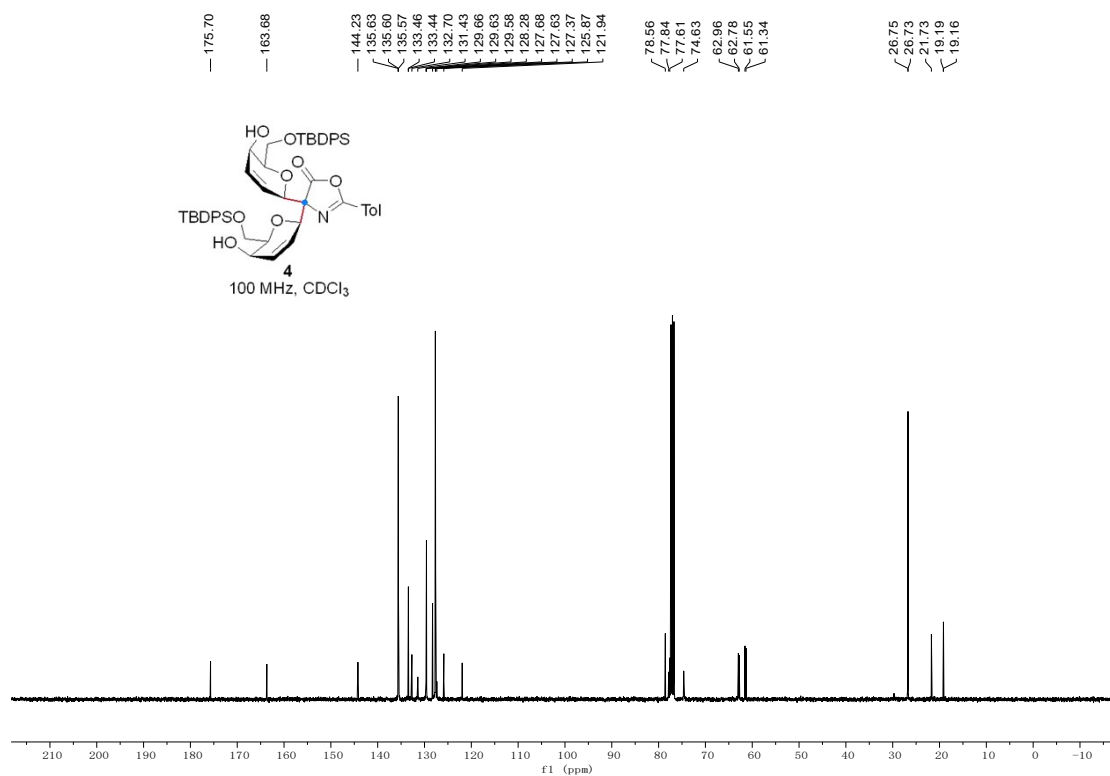

Figure S79. <sup>13</sup>C NMR spectrum of **4**

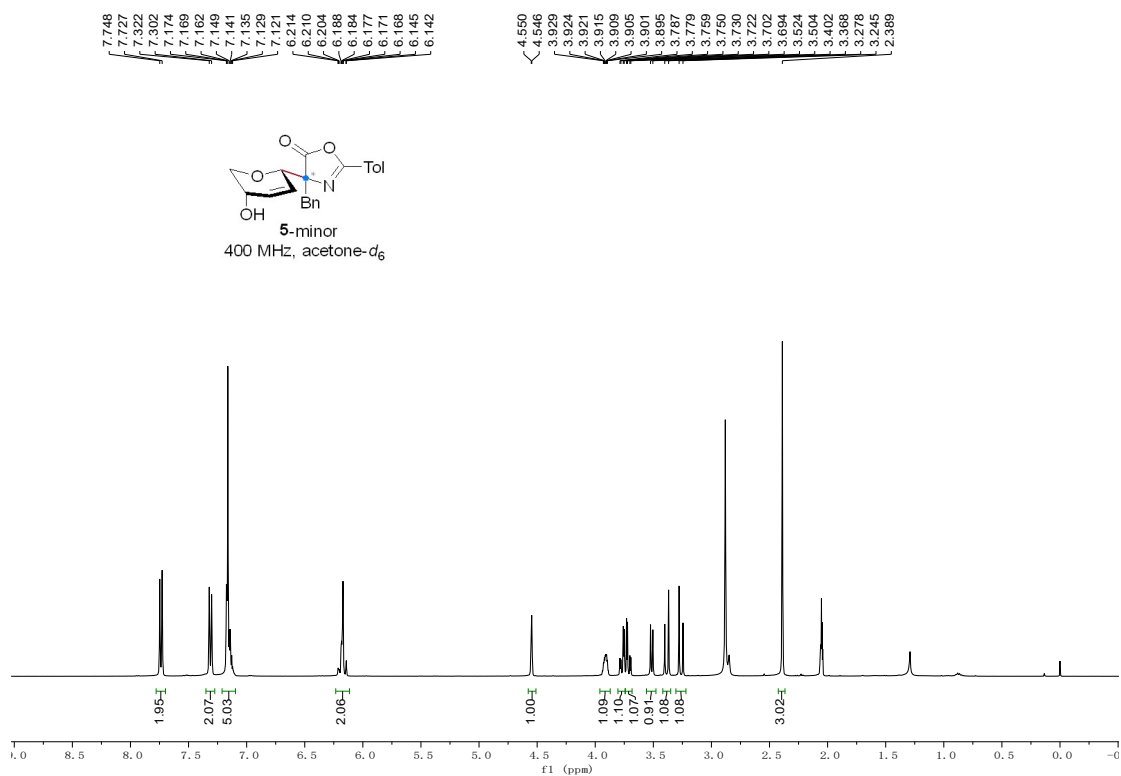

Figure S80.  $^1\text{H}$  NMR spectrum of **5-minor**

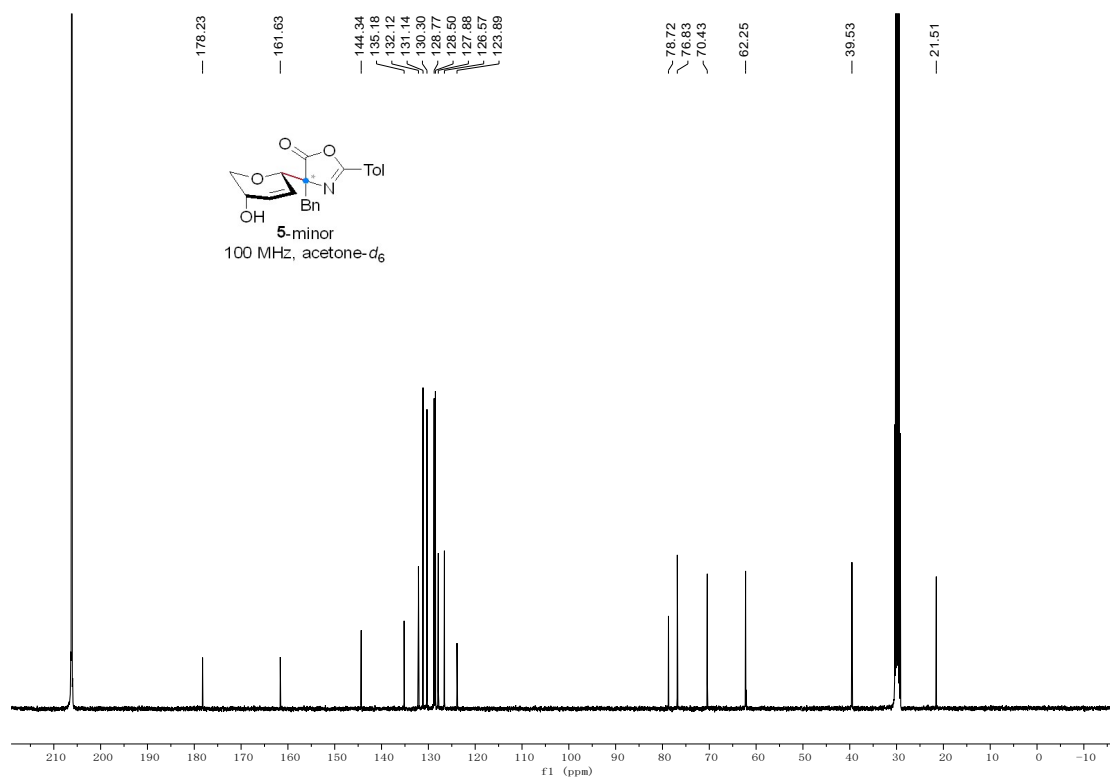

Figure S81.  $^{13}\text{C}$  NMR spectrum of **5-minor**

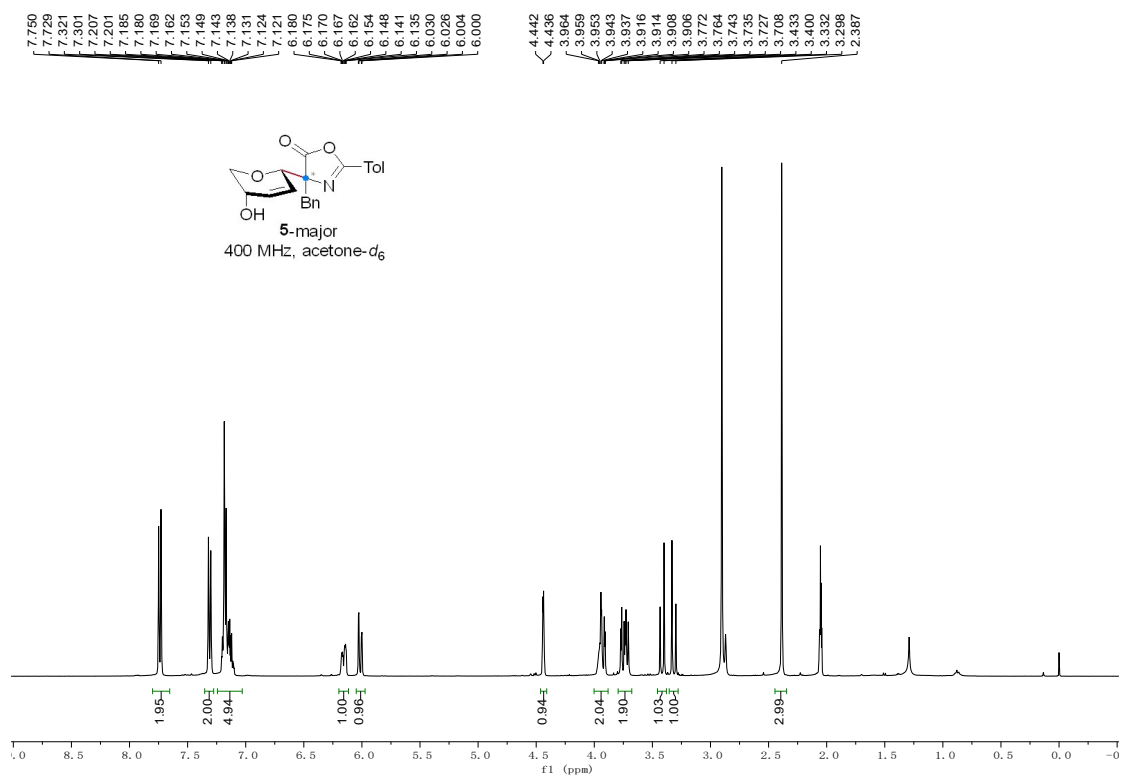

Figure S82.  $^1\text{H}$  NMR spectrum of **5-major**

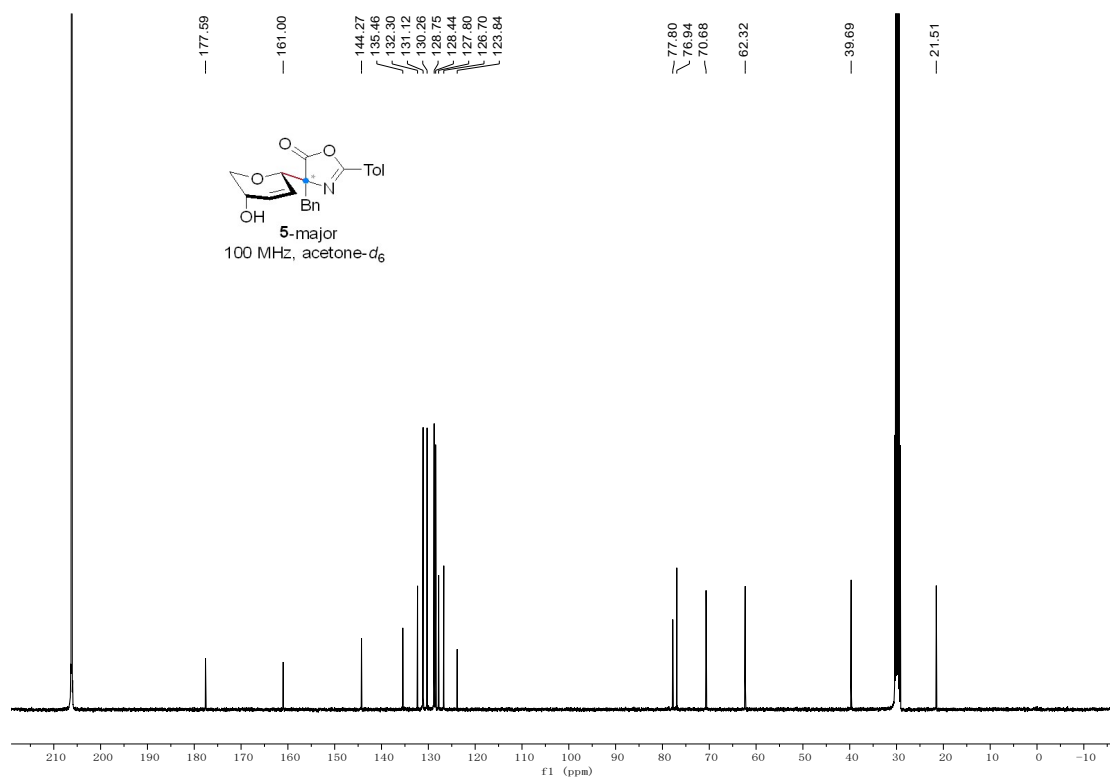

Figure S83.  $^{13}\text{C}$  NMR spectrum of **5-major**

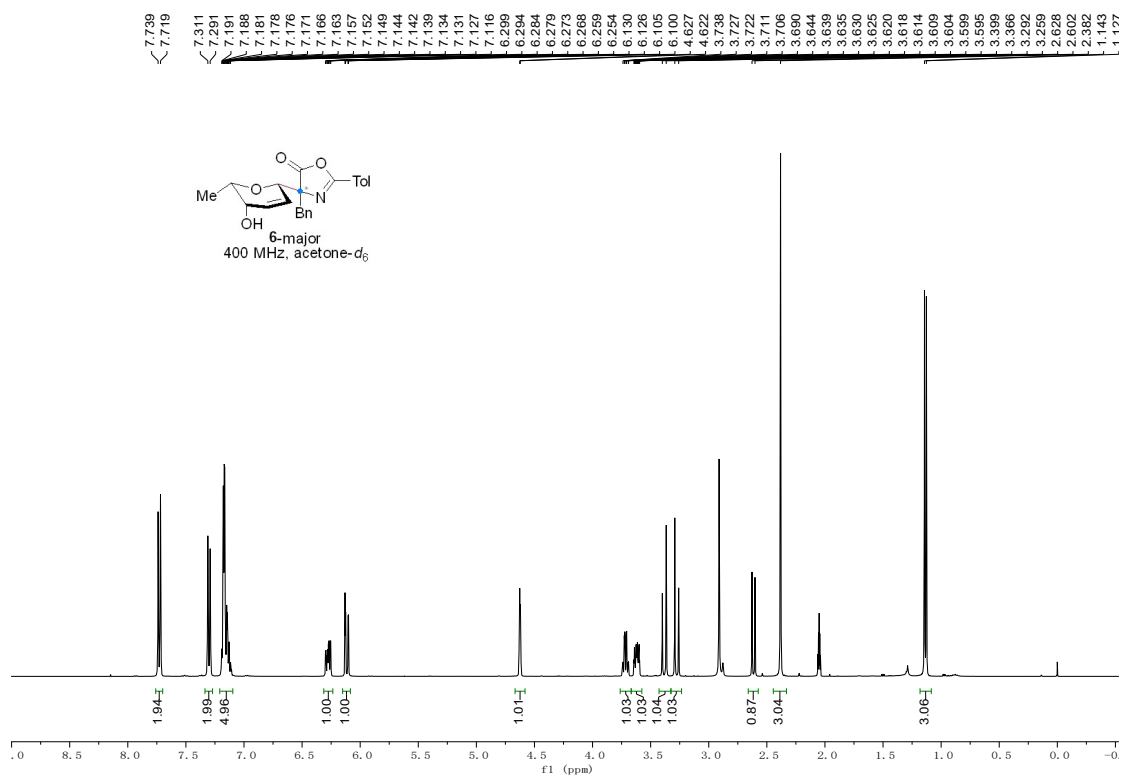

Figure S84. <sup>1</sup>H NMR spectrum of **6-major**

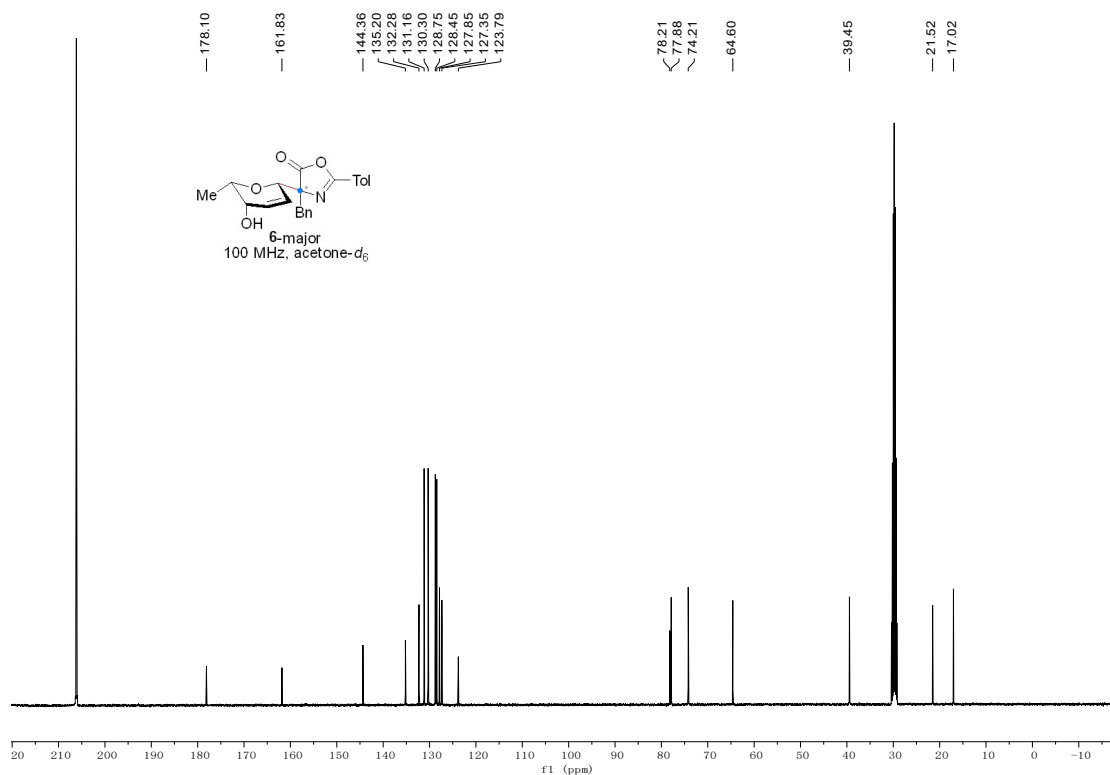

Figure S85. <sup>13</sup>C NMR spectrum of **6-major**

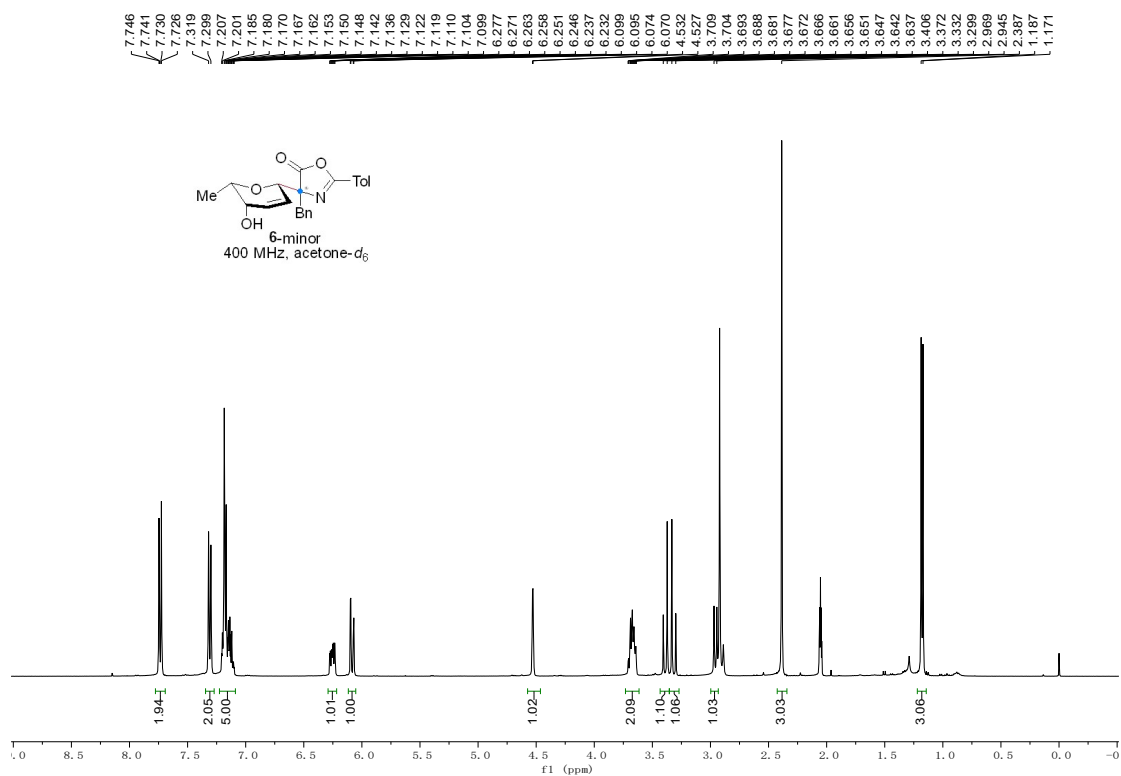

Figure S86. <sup>1</sup>H NMR spectrum of 6-minor

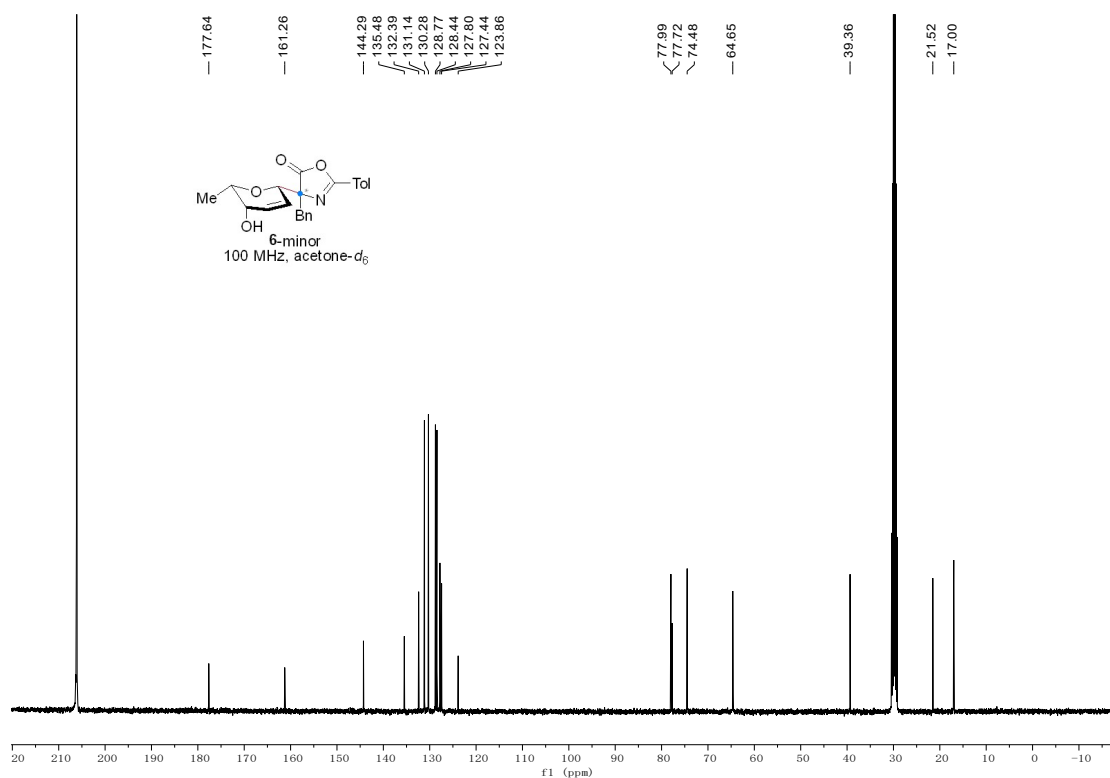

Figure S87. <sup>13</sup>C NMR spectrum of 6-minor

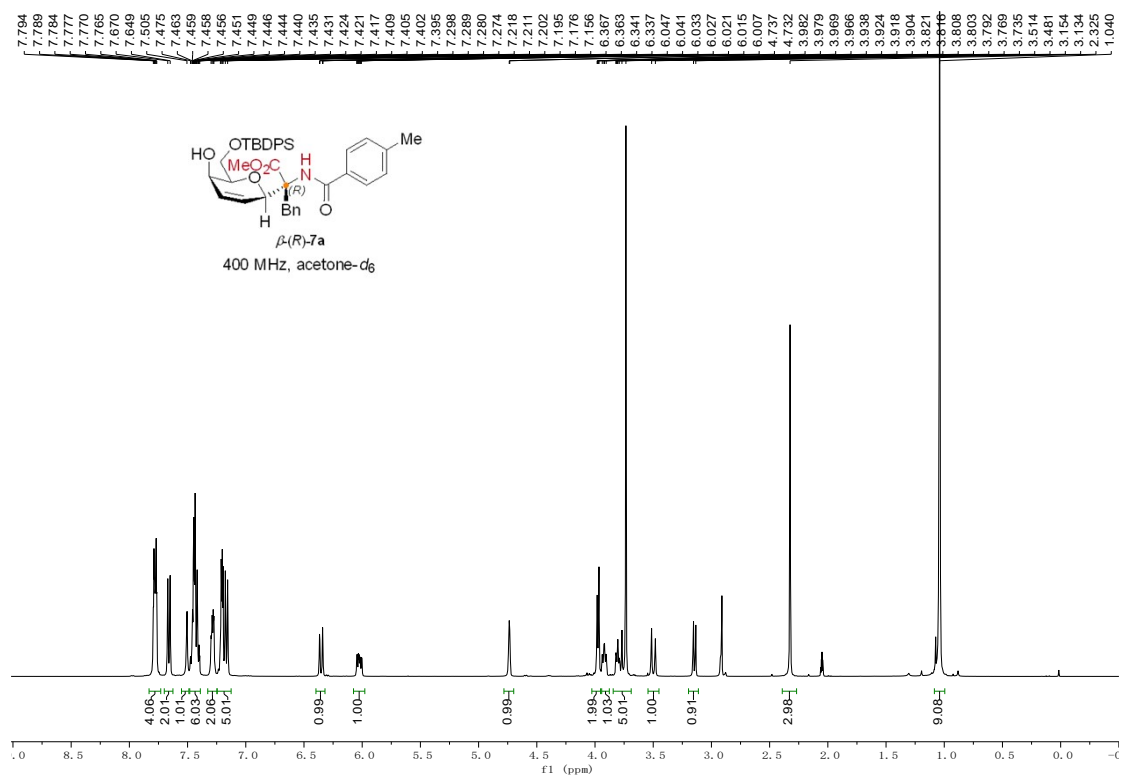

Figure S88.  $^1\text{H}$  NMR spectrum of  $\beta$ -(*R*)-7a

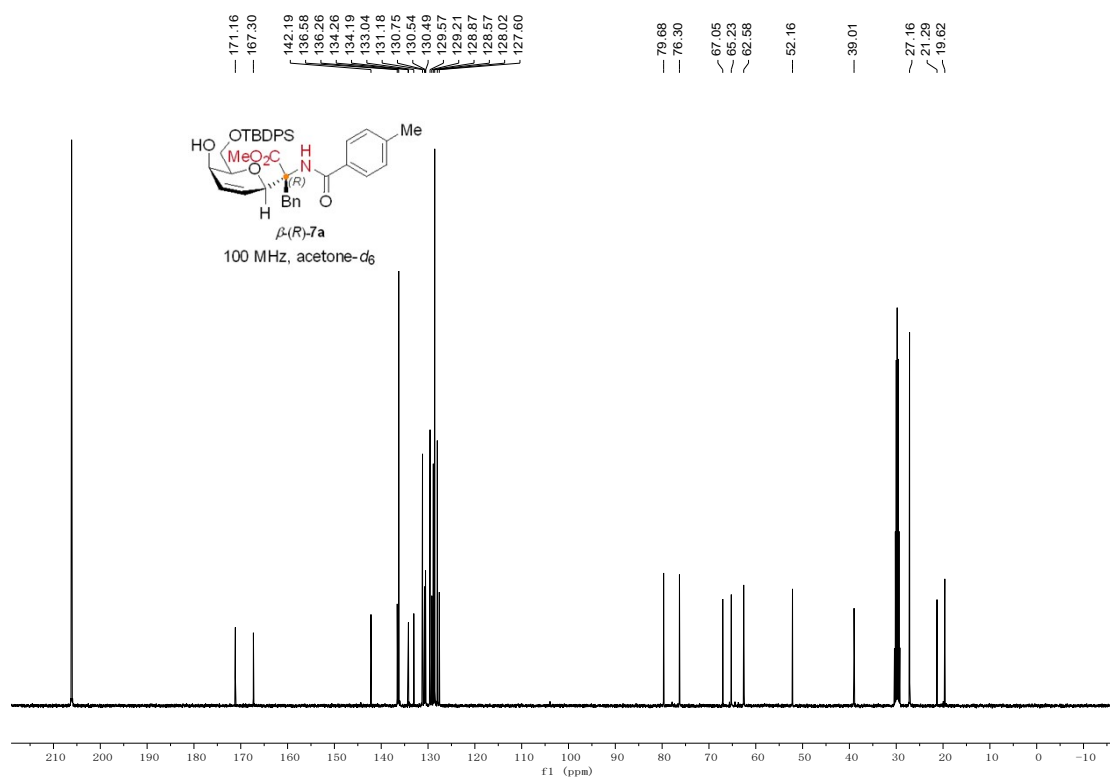

Figure S89.  $^{13}\text{C}$  NMR spectrum of  $\beta$ -(*R*)-7a

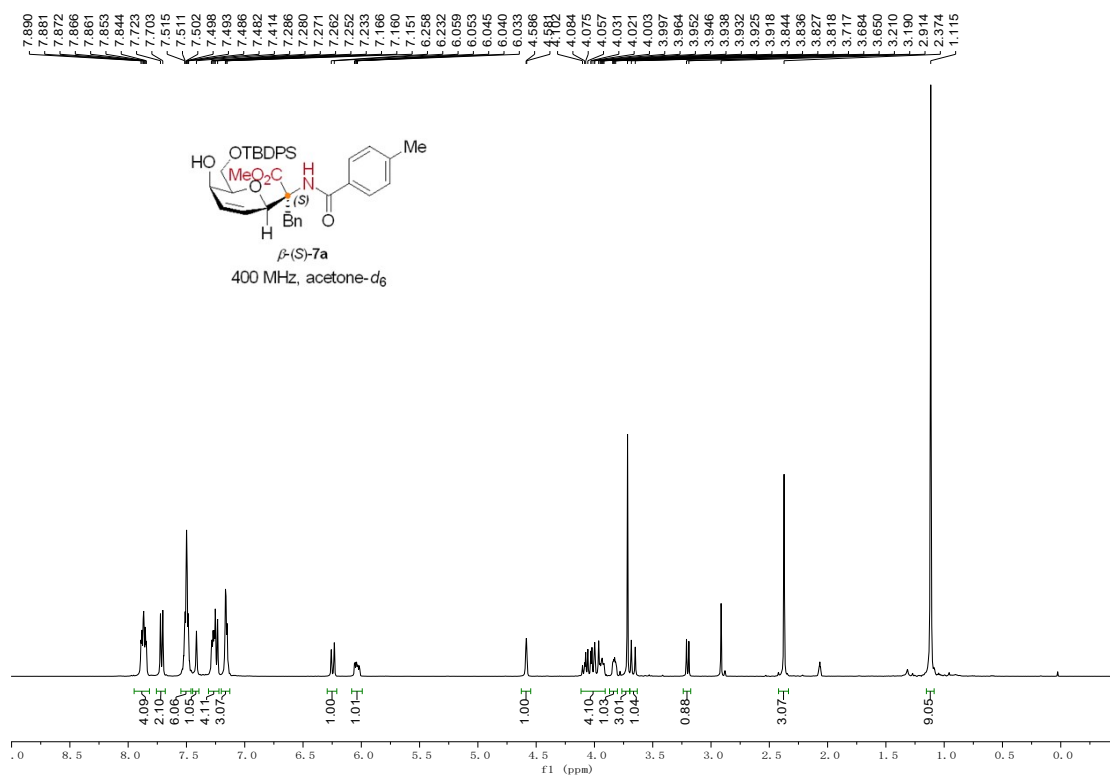

Figure S90. <sup>1</sup>H NMR spectrum of  $\beta$ -(S)-7a

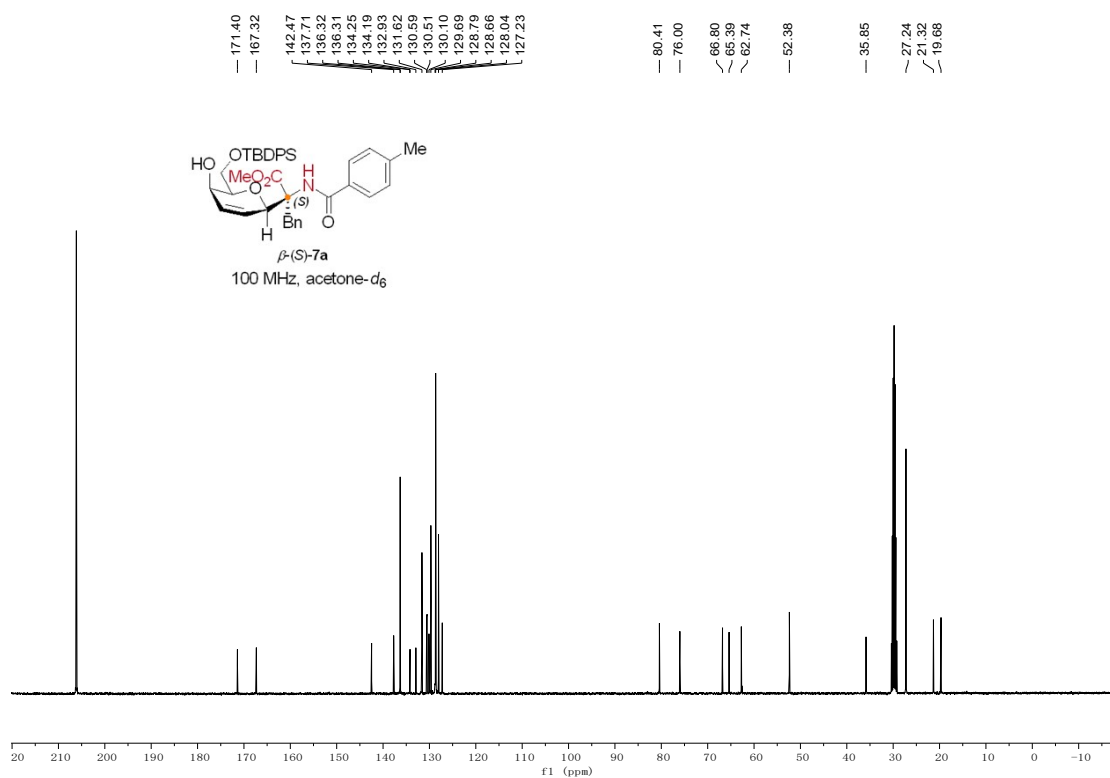

Figure S91. <sup>13</sup>C NMR spectrum of  $\beta$ -(S)-7a



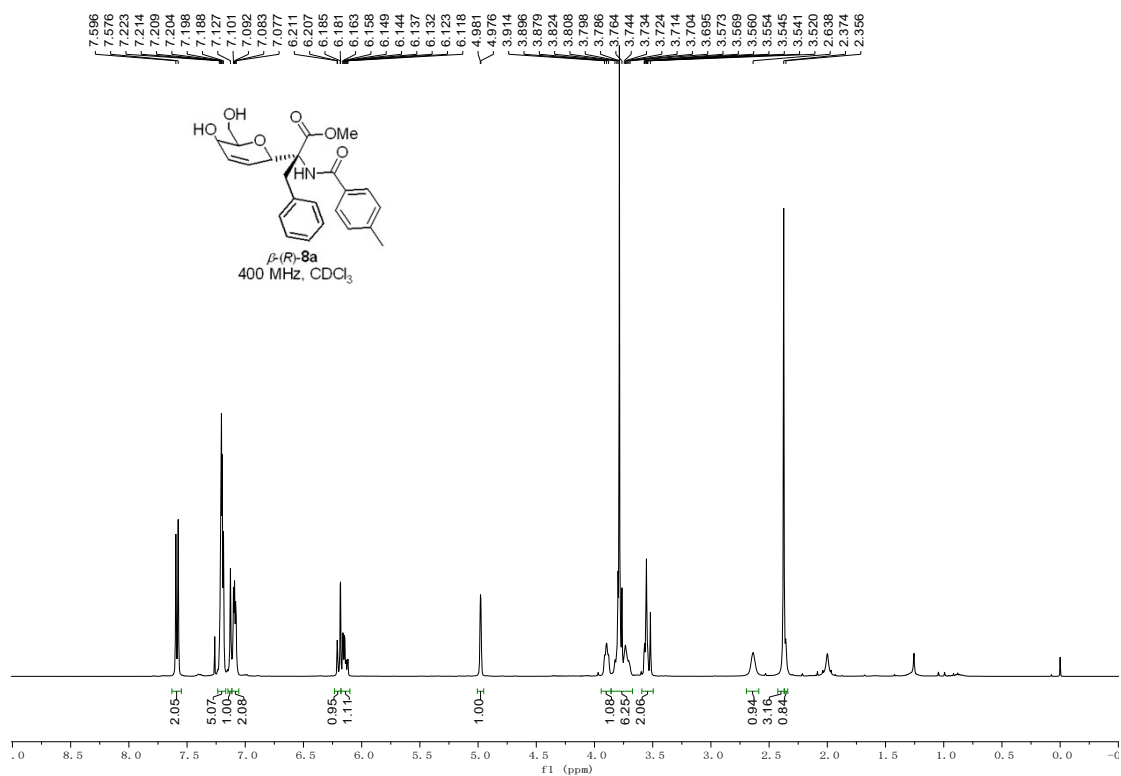

Figure S92. <sup>1</sup>H NMR spectrum of  $\beta$ -(R)-8a

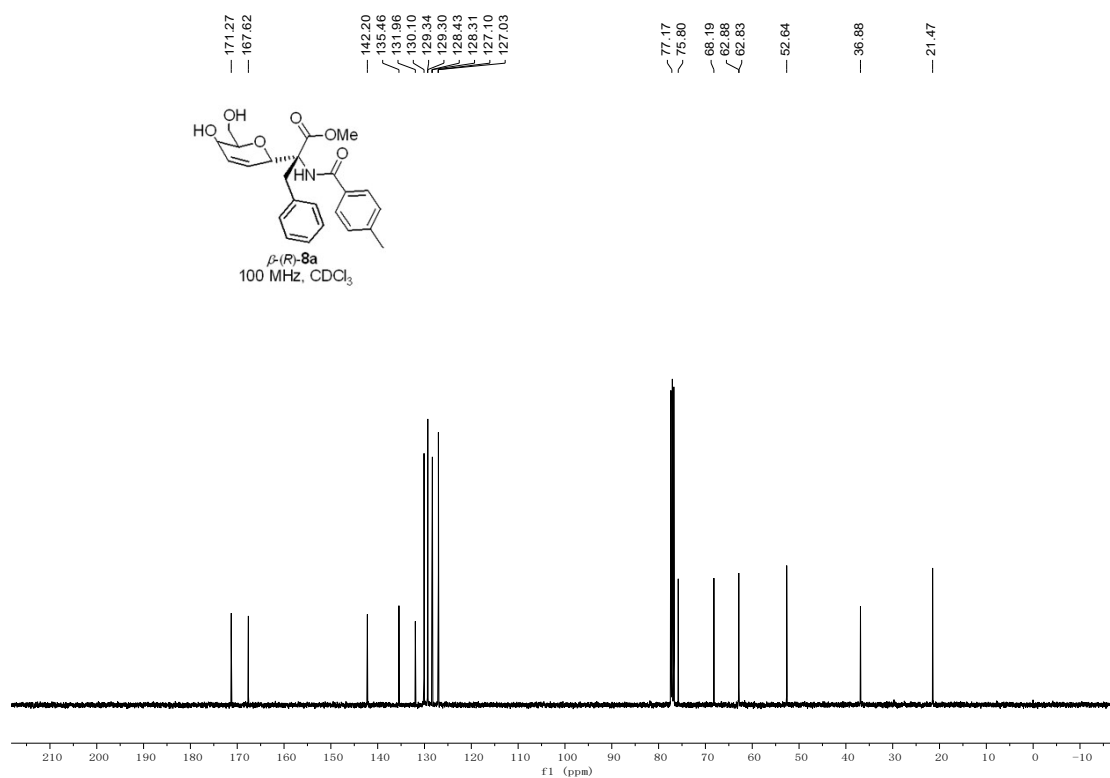

Figure S93. <sup>13</sup>C NMR spectrum of  $\beta$ -(R)-8a

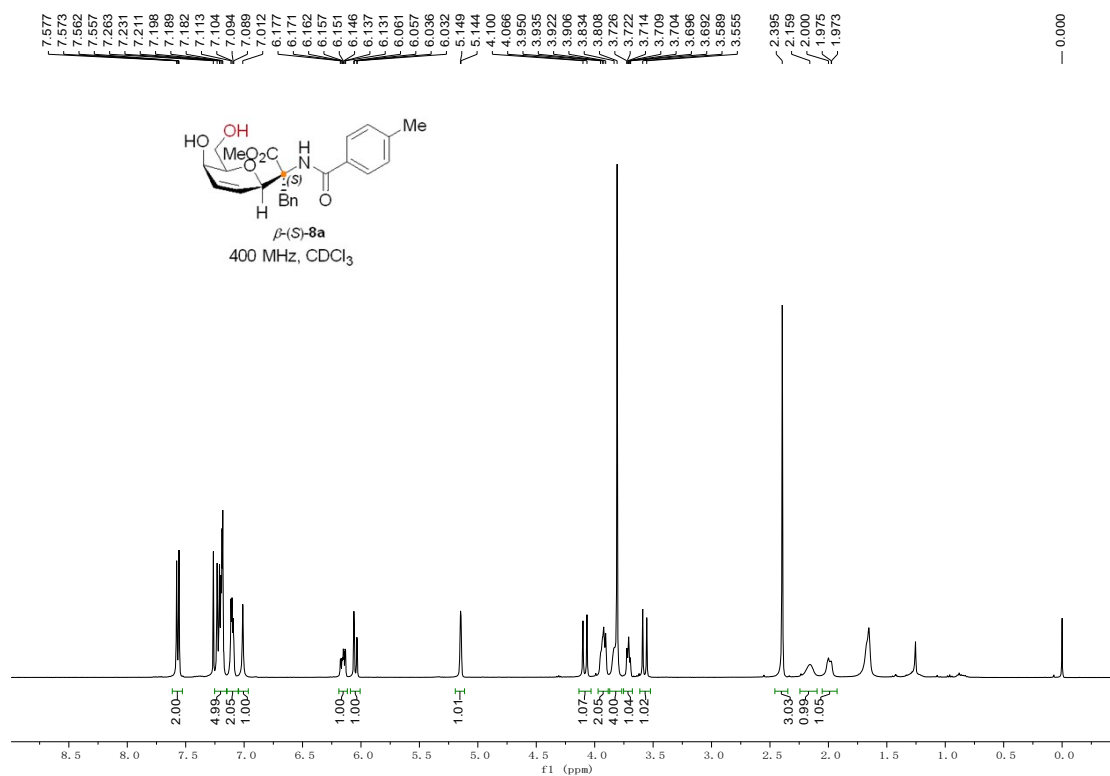

Figure S94.  $^1\text{H}$  NMR spectrum of  $\beta$ -(S)-8a

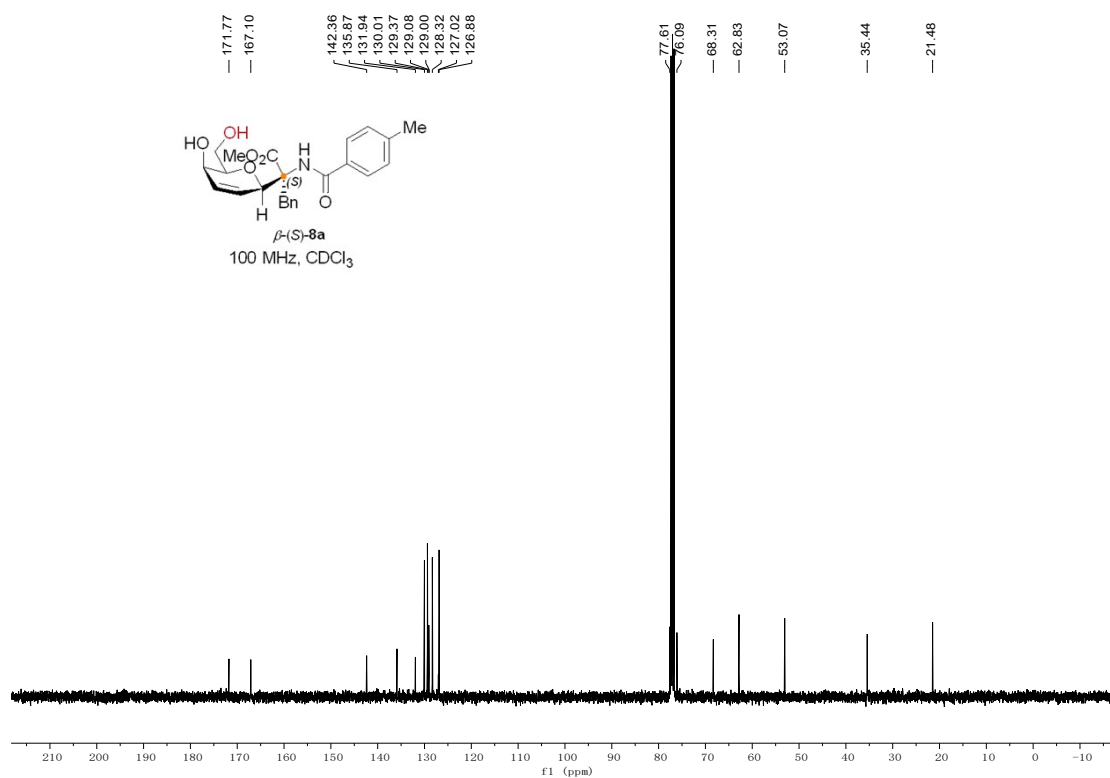

Figure S95.  $^{13}\text{C}$  NMR spectrum of  $\beta$ -(S)-8a

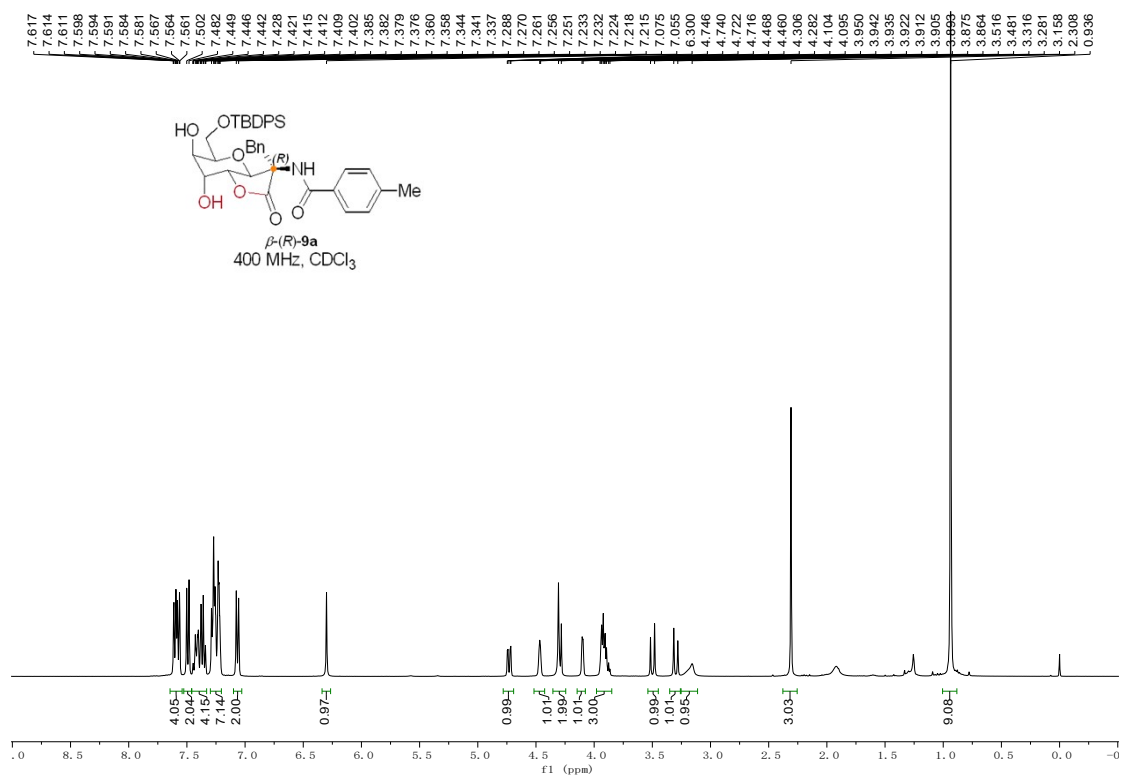

Figure S96.  $^1\text{H}$  NMR spectrum of  $\beta$ -(R)-9a

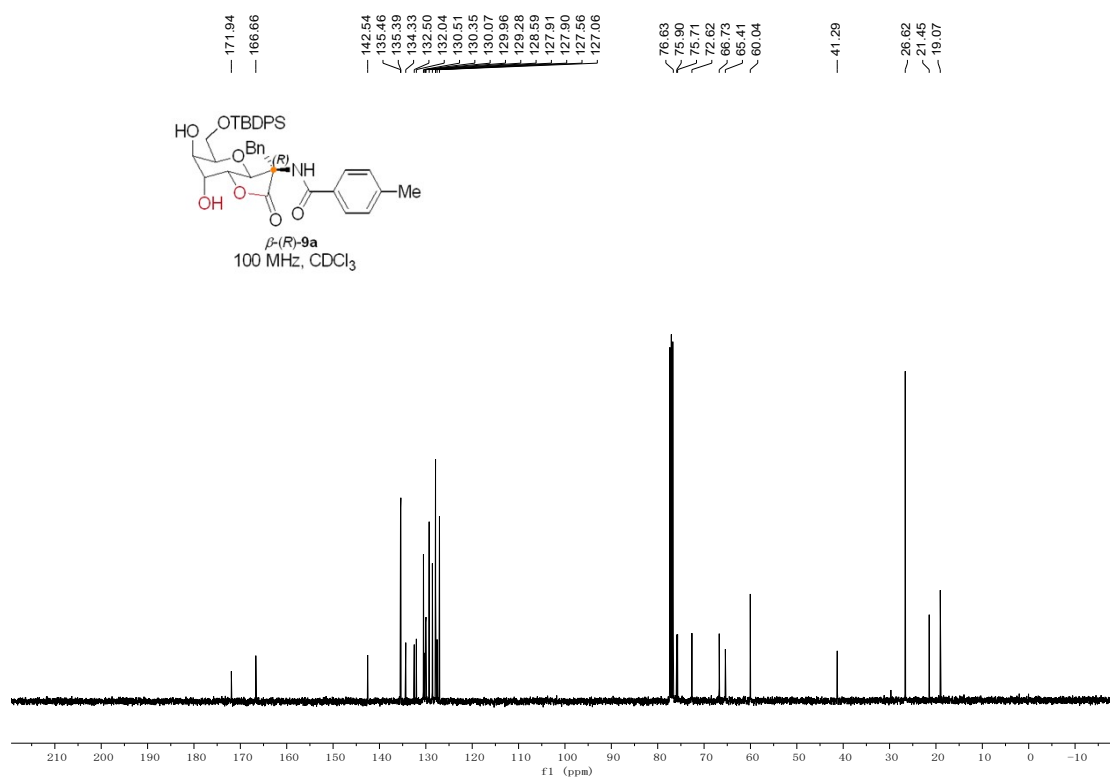

Figure S97.  $^{13}\text{C}$  NMR spectrum of  $\beta$ -(R)-9a

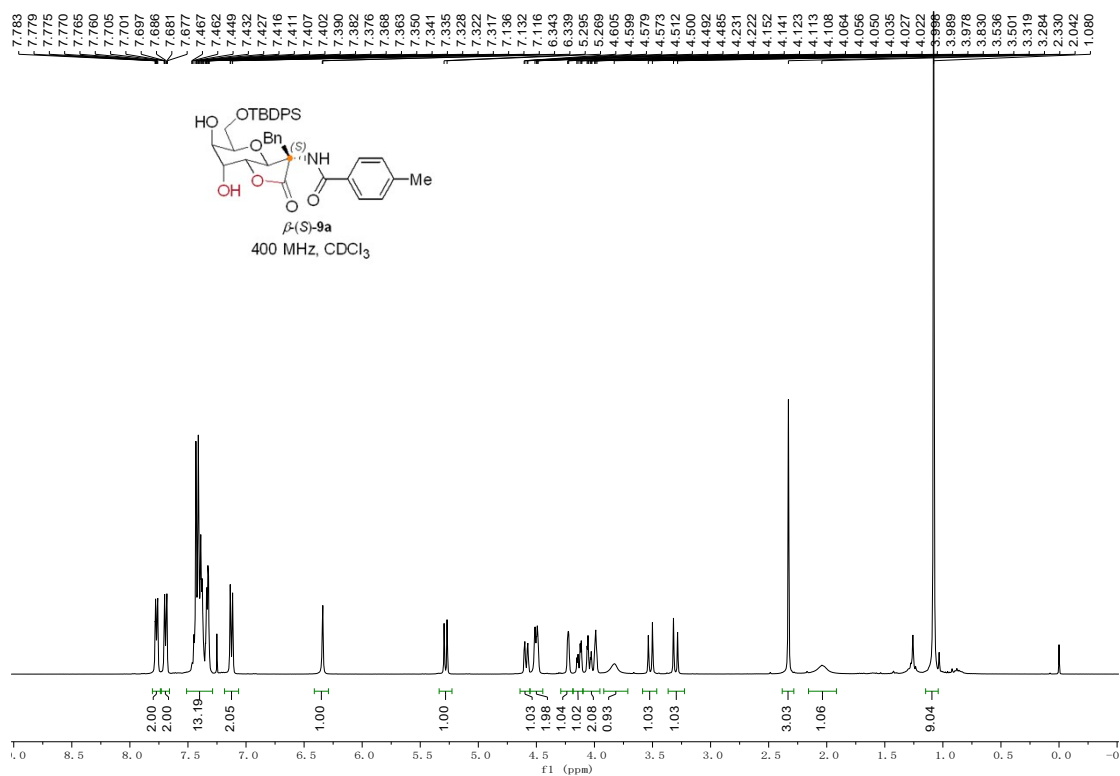

Figure S98. <sup>1</sup>H NMR spectrum of  $\beta$ -(S)-9a

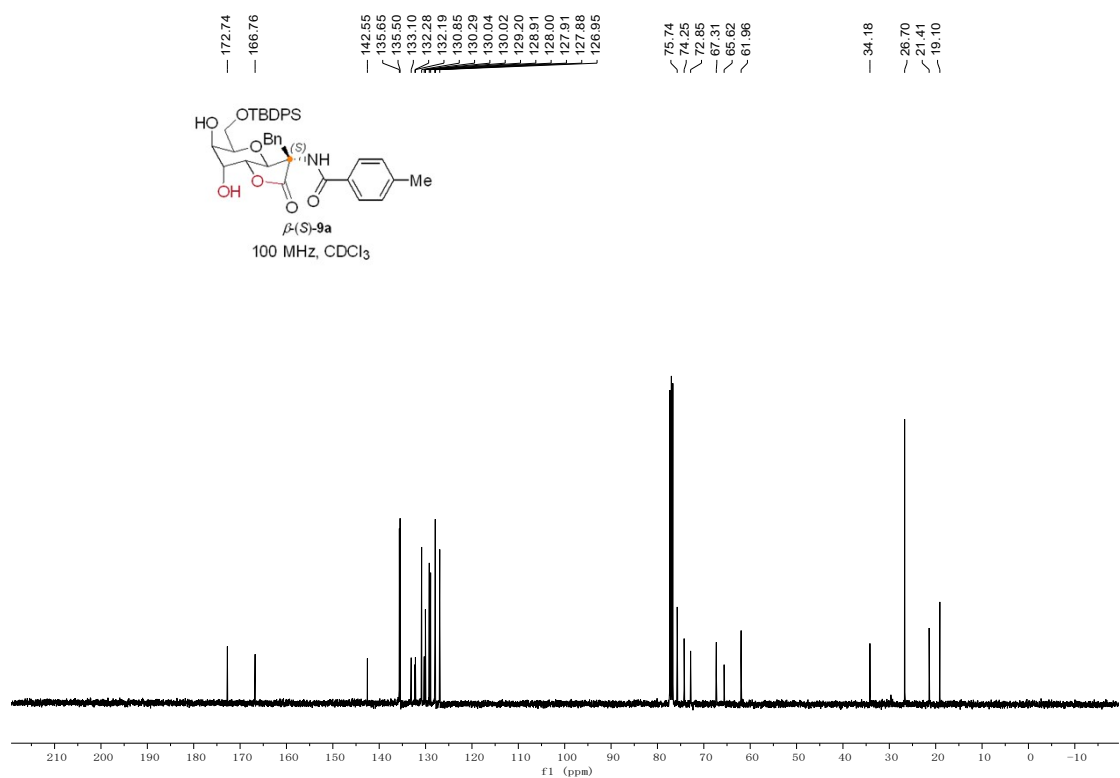

Figure S99. <sup>13</sup>C NMR spectrum of  $\beta$ -(S)-9a

## 8. $\beta$ -selectivity at anomeric center determined by 2D-NMR

### 8.1 $\beta$ -selectivity of $\beta$ -(*R*)-3a determined by 2D-NMR

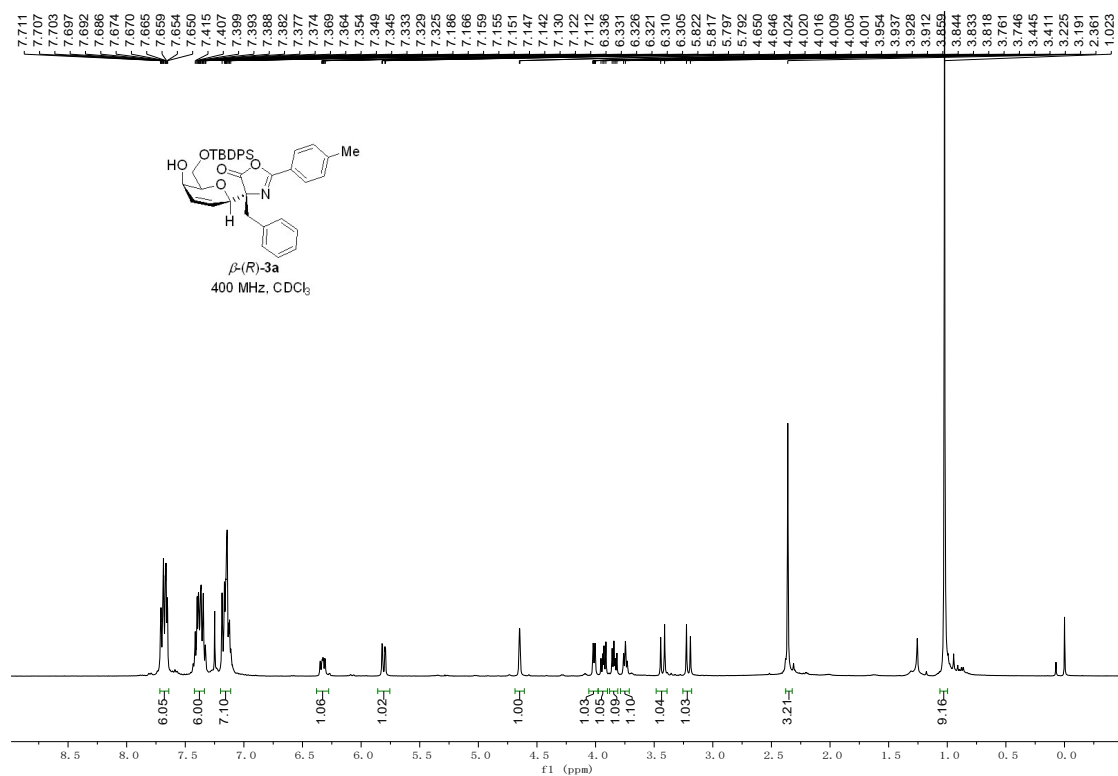

Figure S100. <sup>1</sup>H NMR spectrum of  $\beta$ -(*R*)-3a

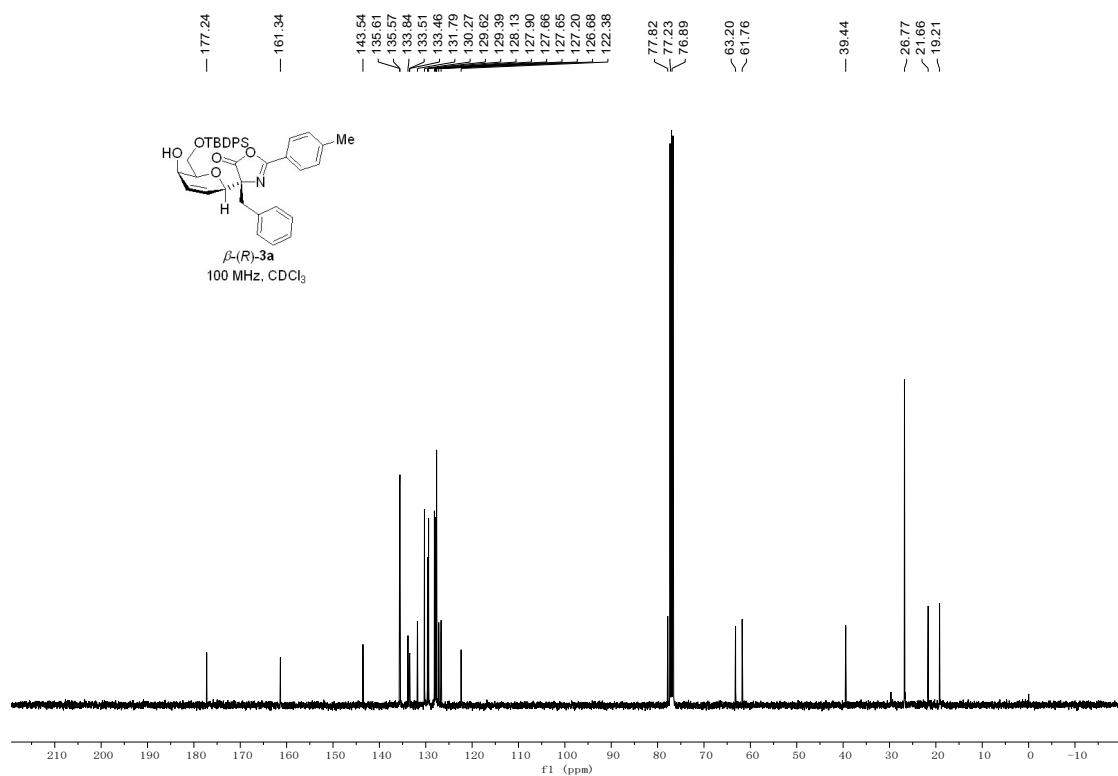

Figure S101. <sup>13</sup>C NMR spectrum of  $\beta$ -(*R*)-3a

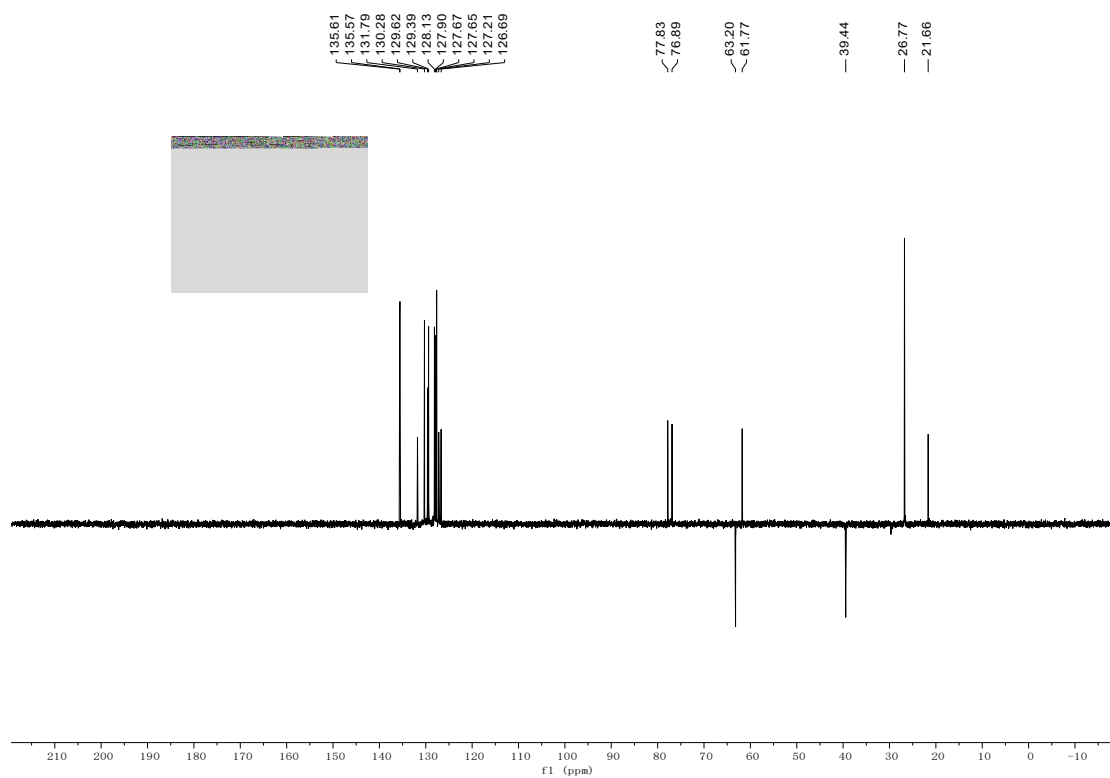

Figure S102. DEPT135 NMR spectrum of  $\beta$ -(*R*)-**3a**

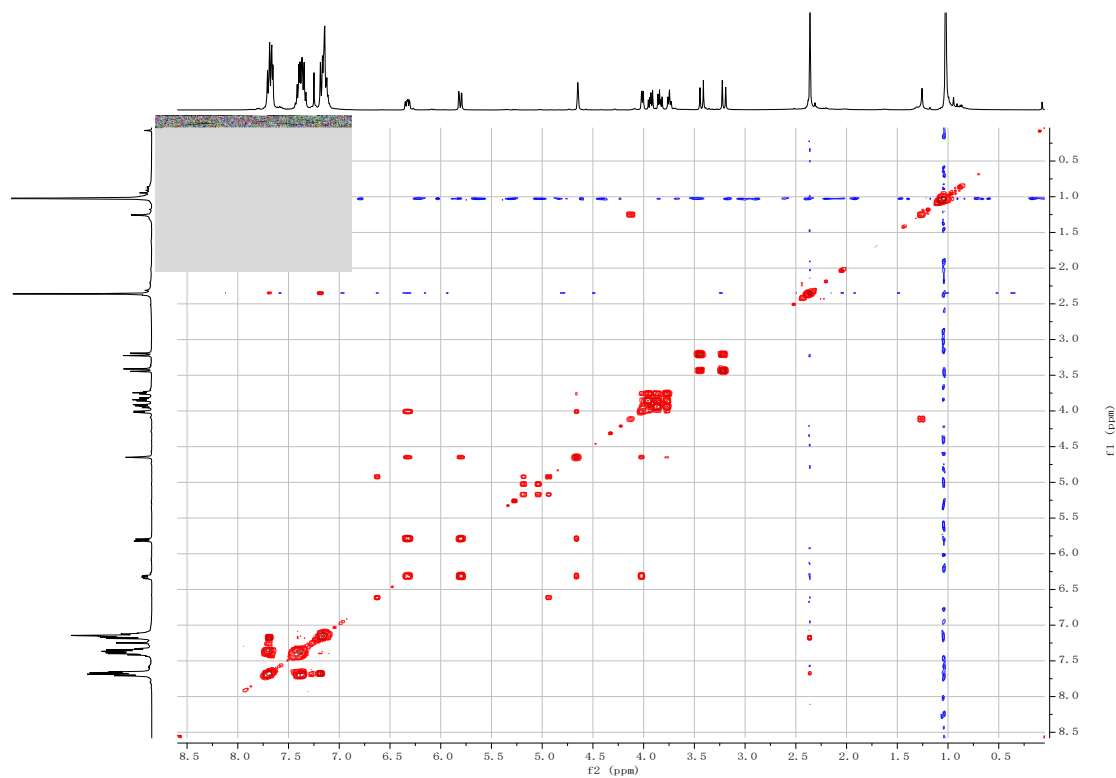

Figure S103.  $^1\text{H}$ - $^1\text{H}$  COSY spectrum of  $\beta$ -(*R*)-**3a**

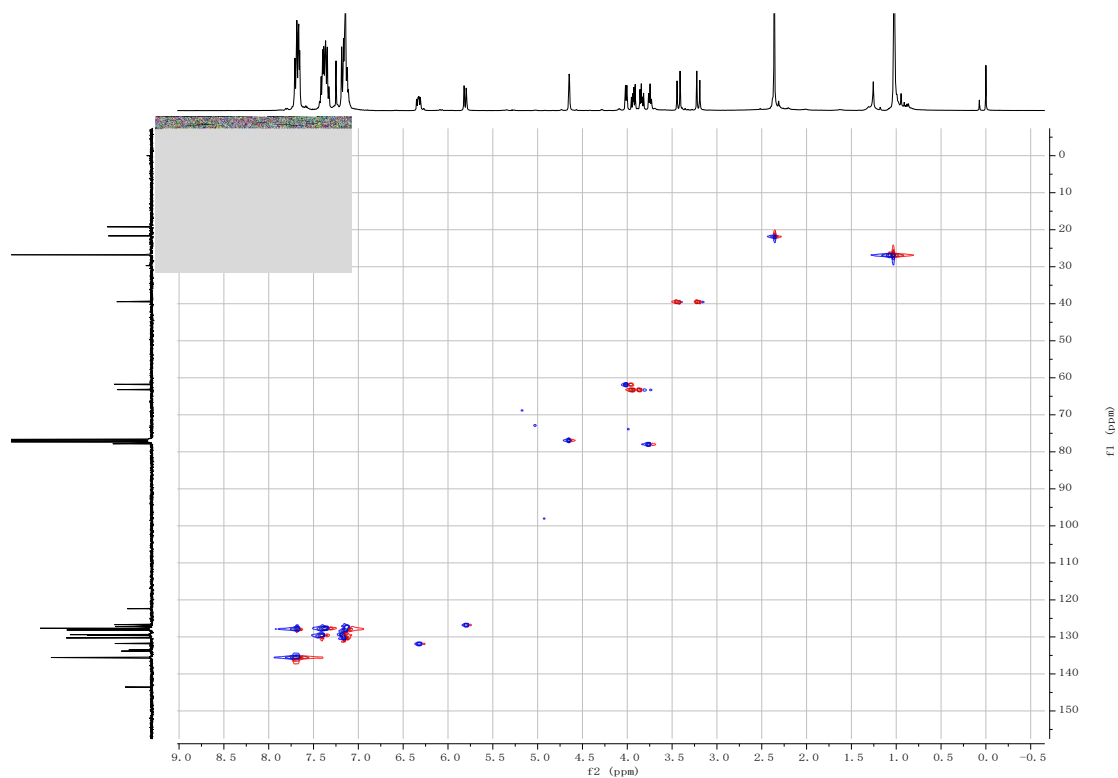

Figure S104. HSQC spectrum of  $\beta$ -(*R*)-**3a**

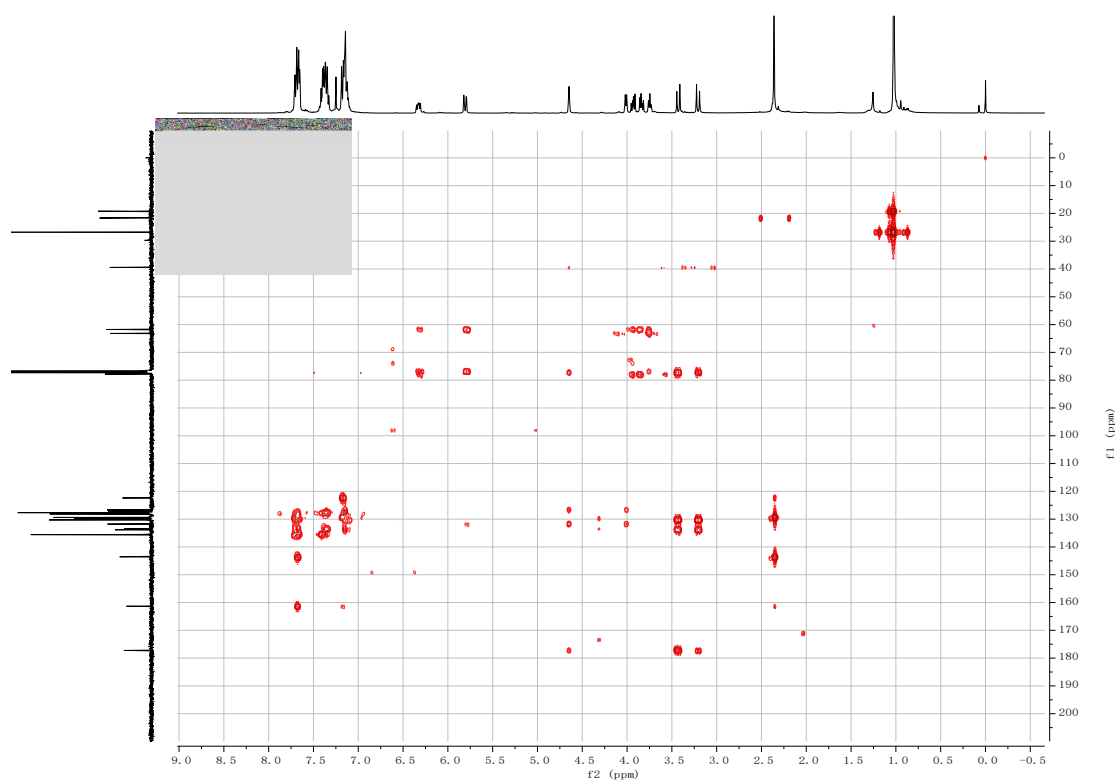

Figure S105. HMBC spectrum of  $\beta$ -(*R*)-**3a**

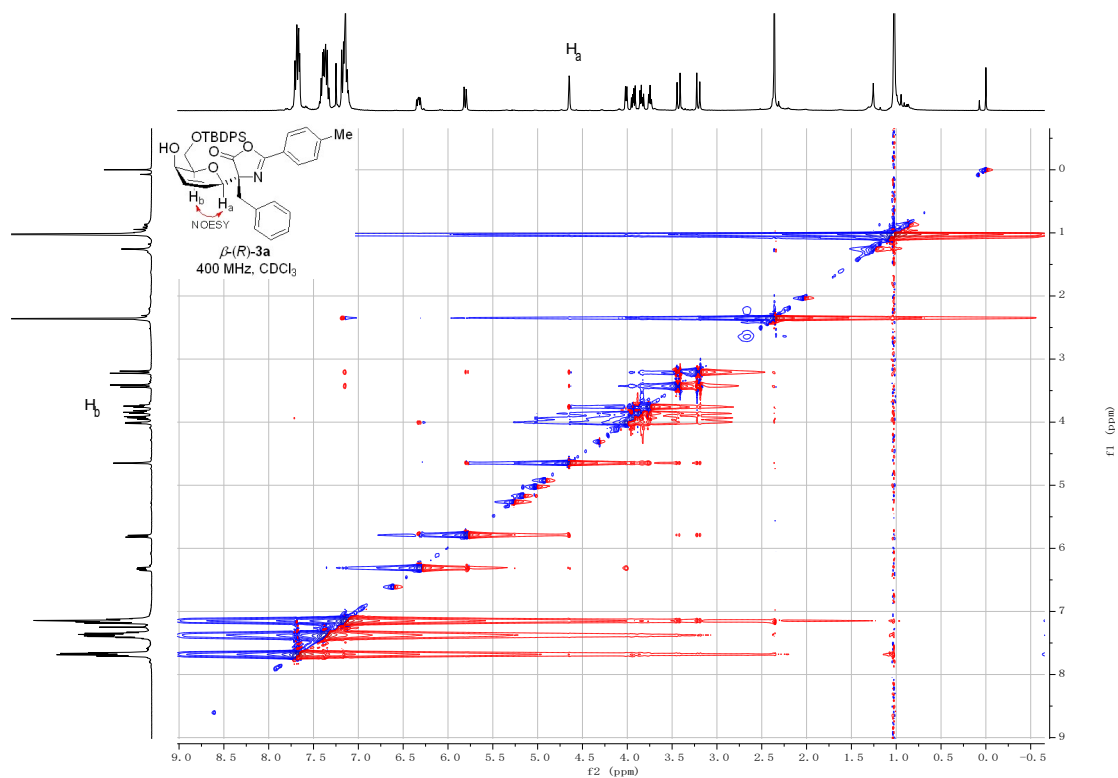

Figure S106. NOESY spectrum of  $\beta$ -(*R*)-3a

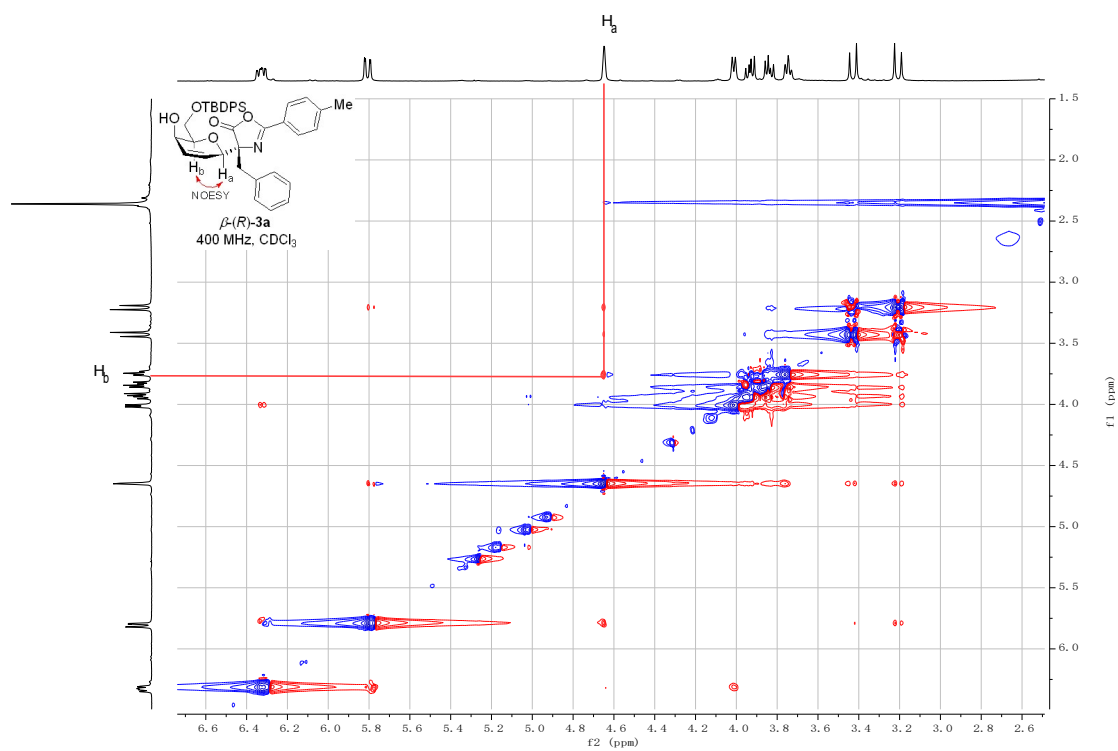

Figure S107. The enlarged NOESY spectrum of  $\beta$ -(*R*)-3a



## 8.2 $\beta$ -selectivity of $\beta$ -(S)-3a determined by 2D-NMR

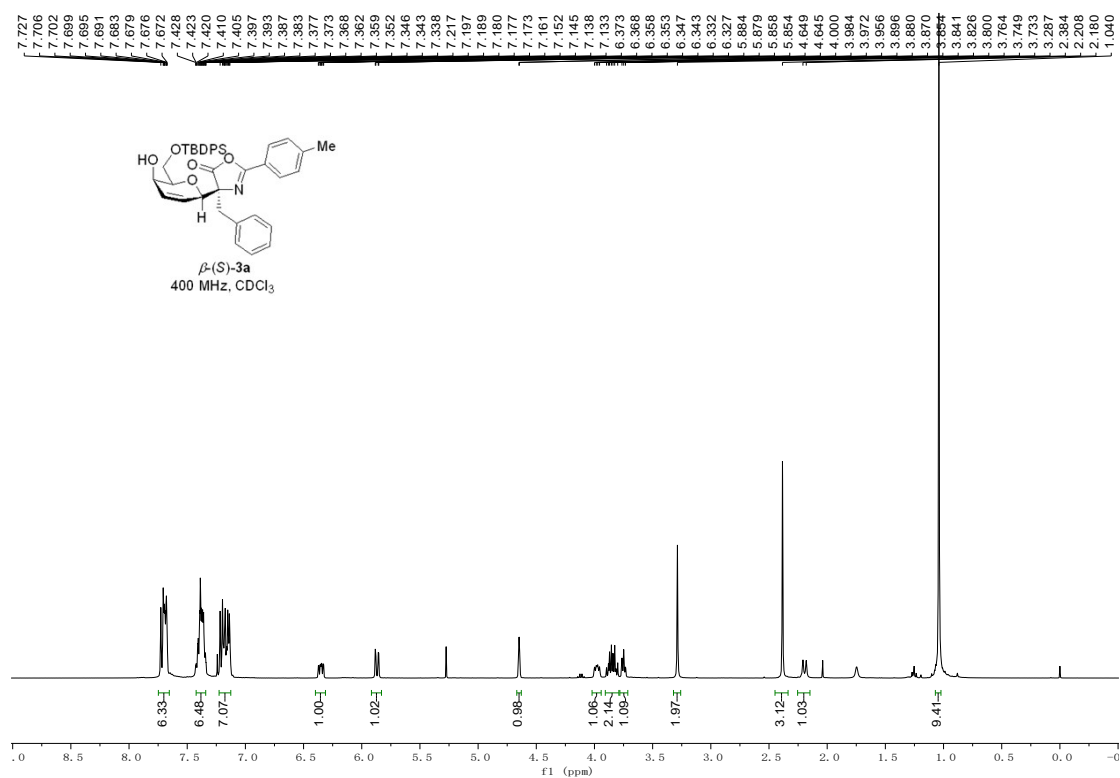

Figure S108. <sup>1</sup>H NMR spectrum of  $\beta$ -(S)-3a

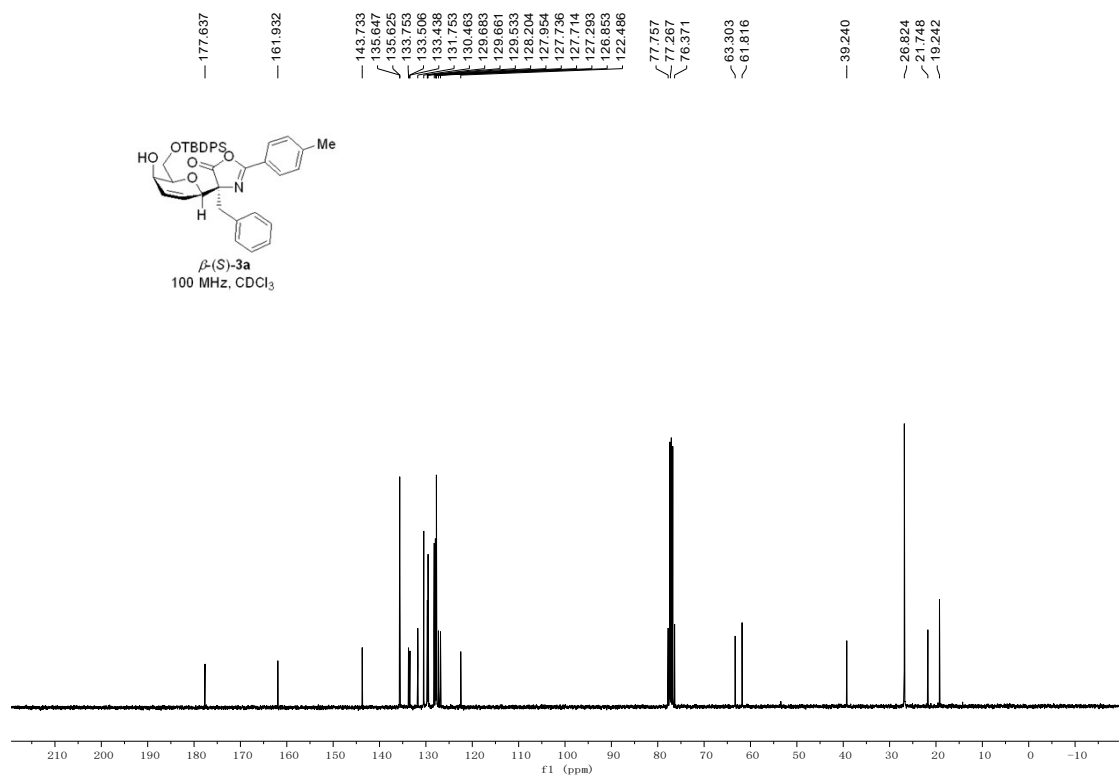

Figure S109. <sup>13</sup>C NMR spectrum of  $\beta$ -(S)-3a

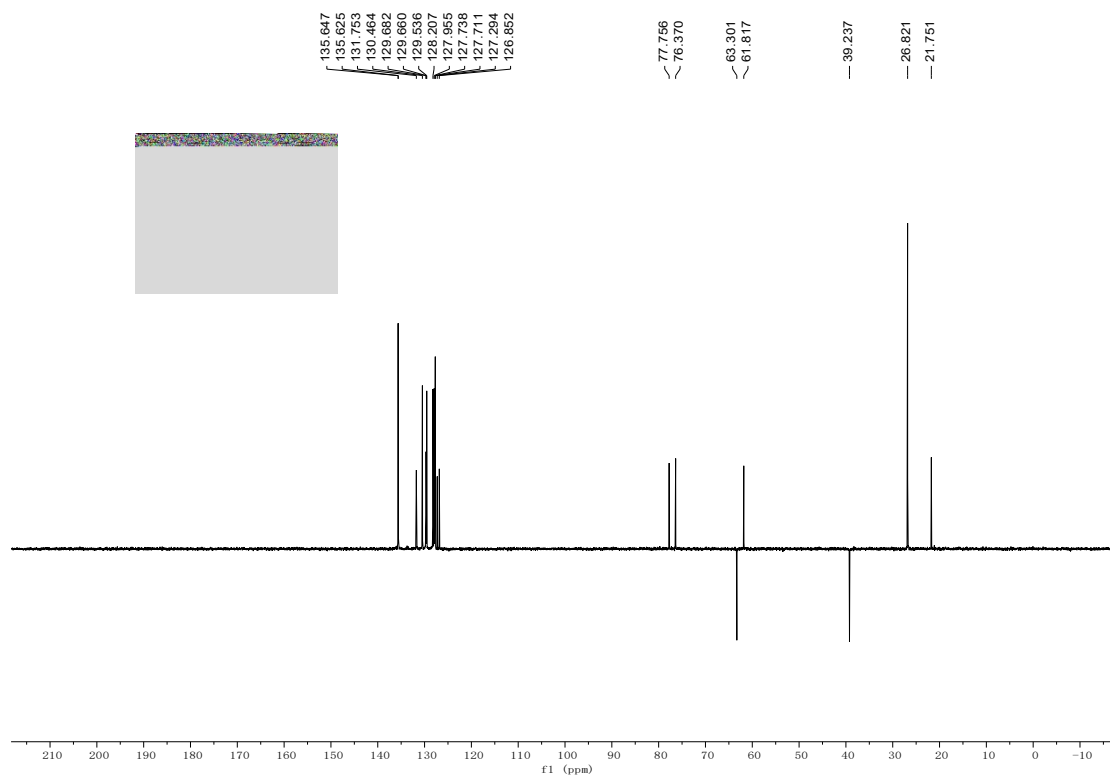

Figure S110. DEPT135 spectrum of  $\beta$ -(*S*)-**3a**

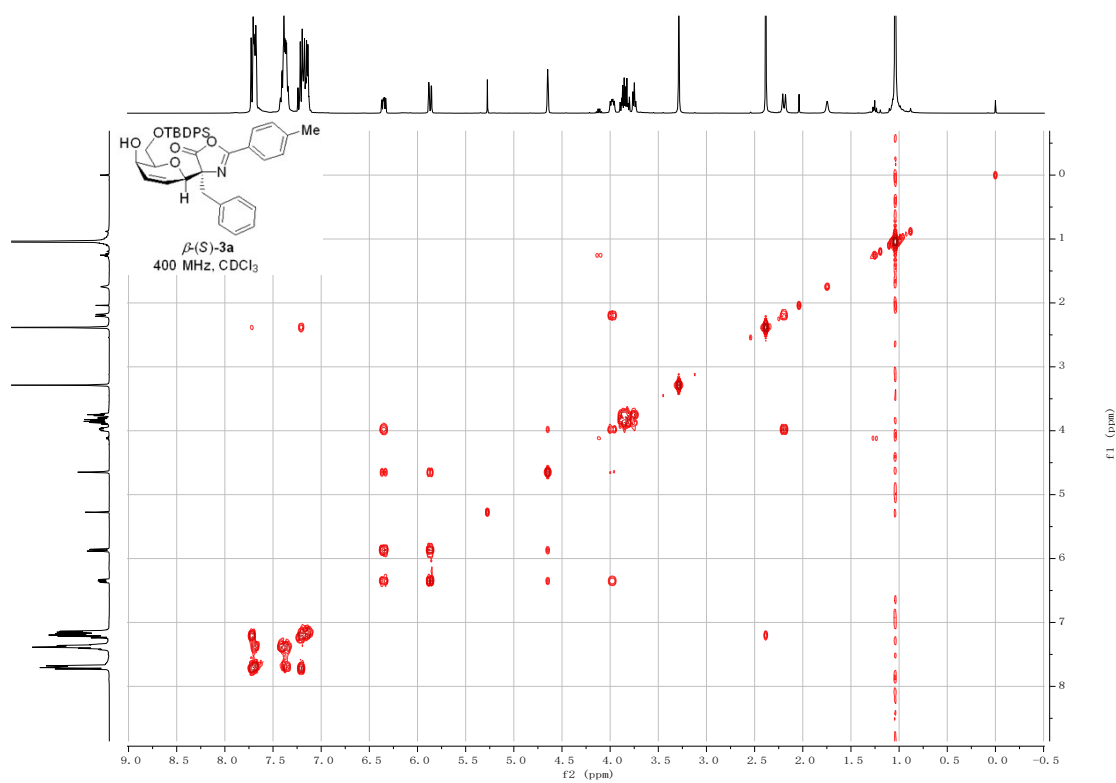

Figure S111. <sup>1</sup>H-<sup>1</sup>H COSY spectrum of  $\beta$ -(*S*)-**3a**

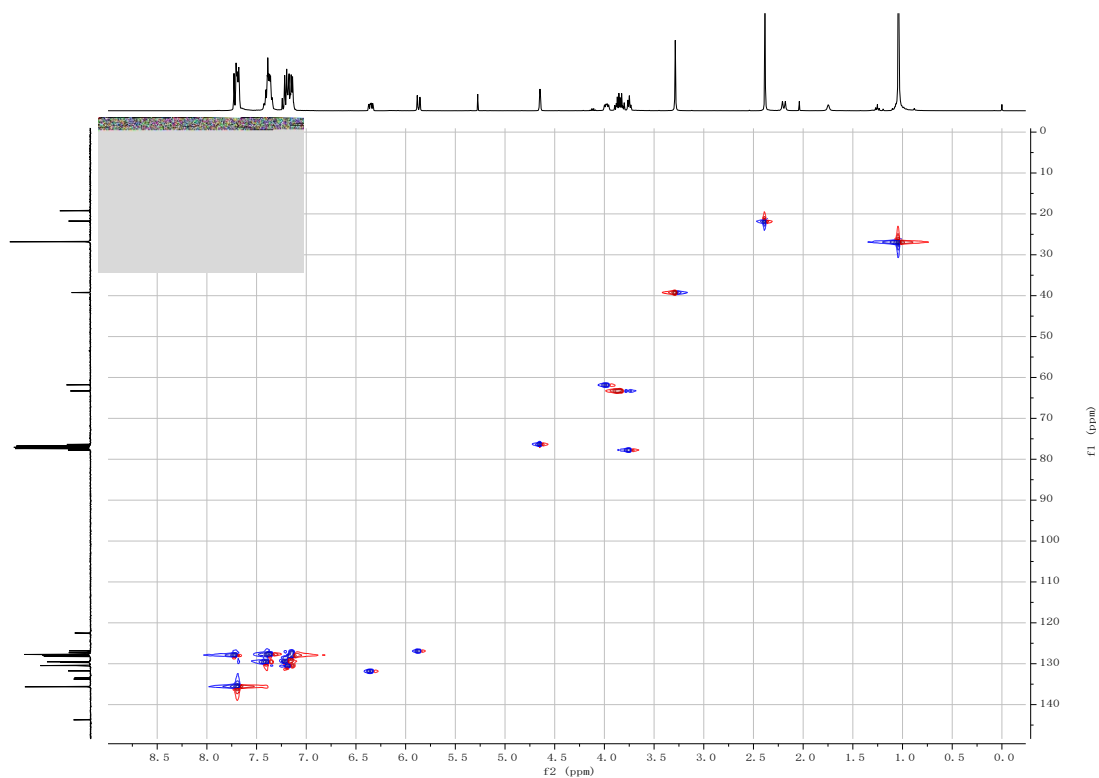

Figure S112. HSQC spectrum of  $\beta$ -(*S*)-**3a**

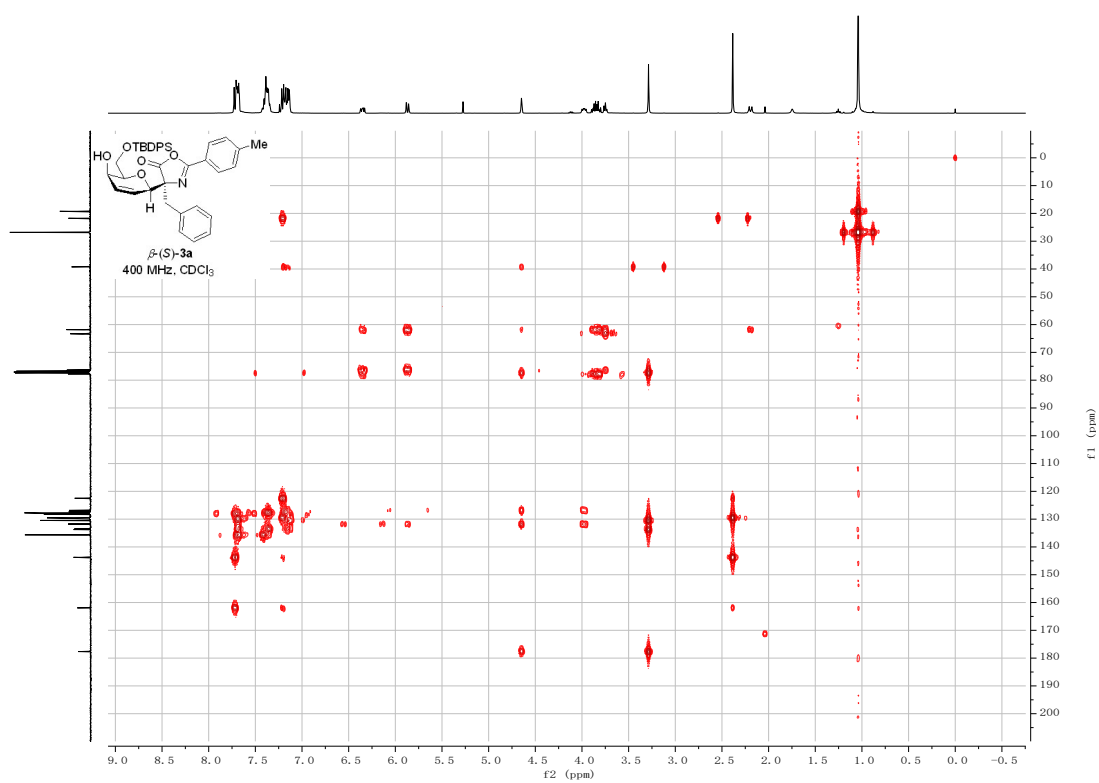

Figure S113. HMBC spectrum of  $\beta$ -(*S*)-**3a**

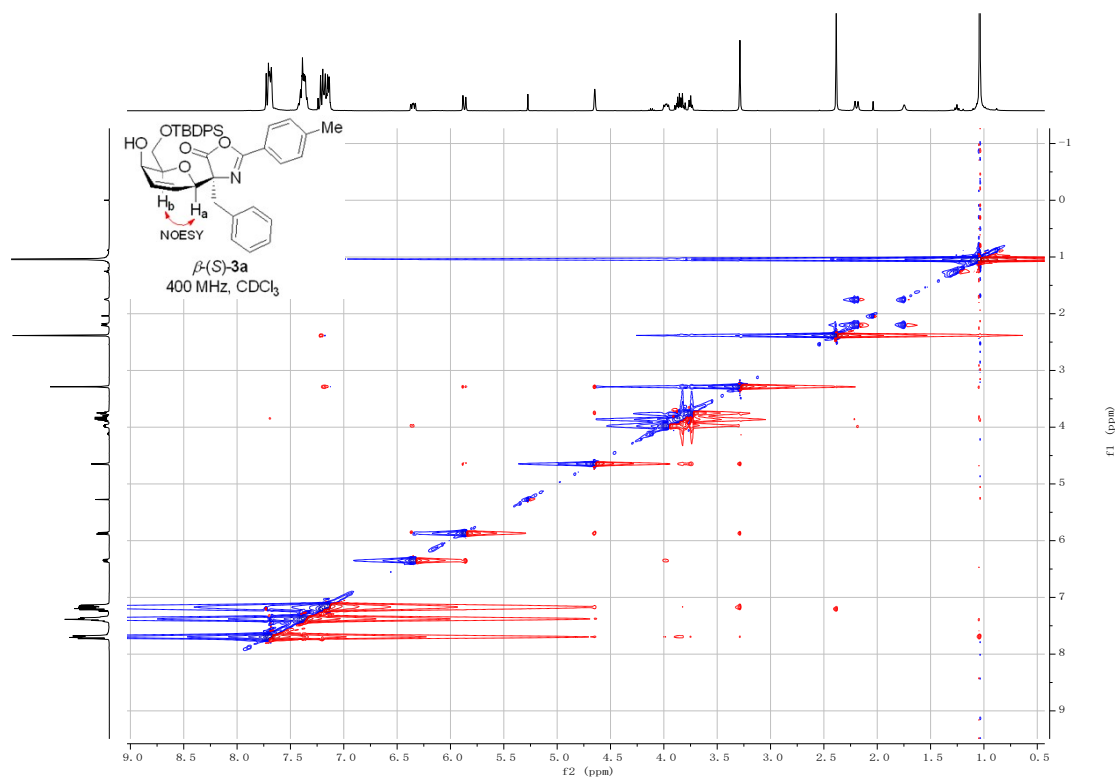

Figure S114. NOESY spectrum of  $\beta$ -(S)-3a

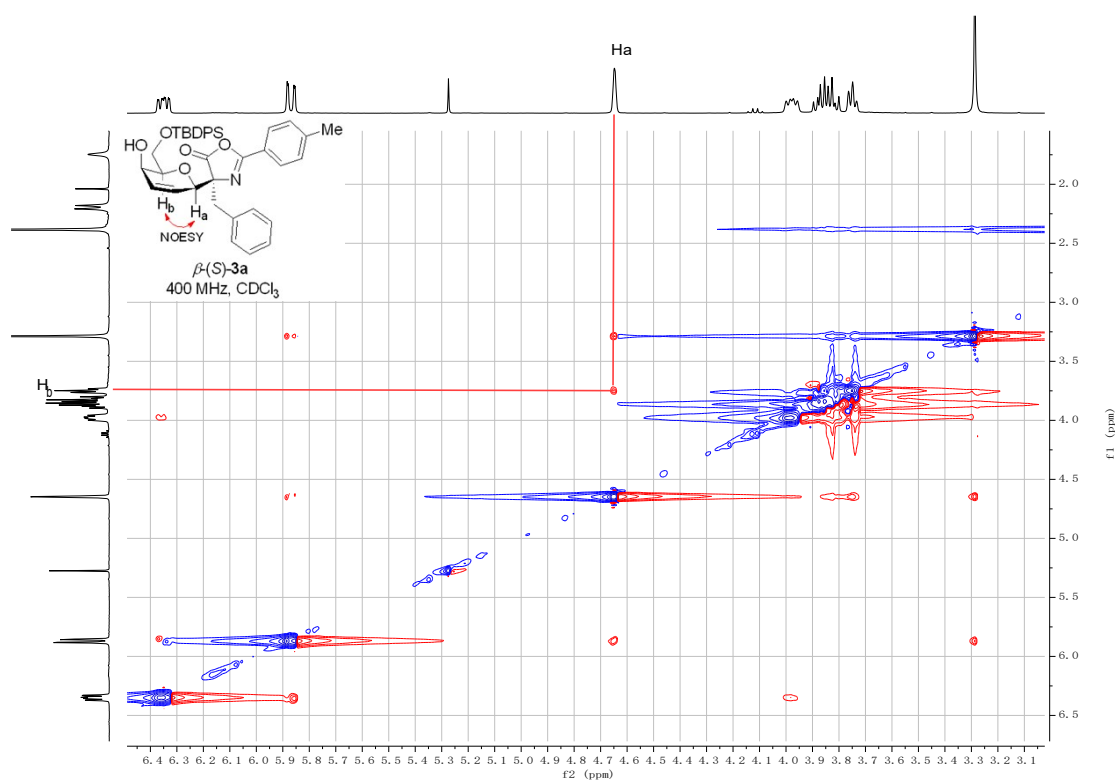

Figure S115. The enlarged NOESY spectrum of  $\beta$ -(S)-3a

## 9. Supplementary references

(1) (a) Dai, Y.; Tian, B.; Chen, H.; Zhang, Q. *ACS Catalysis* **2019**, *9*, 2909-2915; (b) Dai, Y.; Zheng, J.; Zhang, Q. *Organic Letters* **2018**, *20*, 3923-3927; (c) Meng, S.; Zhong, W.; Yao, W.; Li, Z. *Organic Letters* **2020**, *22*, 2981-2986.

(2) (a) Badiola, E.; Fiser, B.; Gómez-Bengoa, E.; Mielgo, A.; Olaizola, I.; Urruzuno, I.; García, J. M.; Odriozola, J. M.; Razkin, J.; Oiarbide, M.; Palomo, C. *Journal of the American Chemical Society* **2014**, *136*, 17869-17881; (b) Gerwick, W. H.; Fenical, W. *The Journal of Organic Chemistry* **1983**, *48*, 3325-3329.

(3) de Mello, A. C.; Momo, P. B.; Burtoloso, A. C. B.; Amarante, G. W. *The Journal of Organic Chemistry* **2018**, *83*, 11399-11406.
